# Supplementary material for: Predominance of hexamethylated 6-methyl branched glycerol dialkyl glycerol tetraethers in the Mariana Trench: source and environmental implication
Source: Copernicus journal article supplement (doi:10.5194/bg-17-2135-2020), 2020-04-17
Supplement: Supplementary file 1 [file bg-17-2135-2020-supplement.zip]

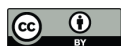

## *Supplement of*

# **Predominance of hexamethylated 6-methyl branched glycerol dialkyl glycerol tetraethers in the Mariana Trench: source and environmental implication**

**Wenjie Xiao et al.**

*Correspondence to:* Yunping Xu ([ypxu@shou.edu.cn](mailto:ypxu@shou.edu.cn))

- [bg-17-2135-2020-supplement-title-page.pdf](#)
- [Xiao et al., Supplementary Table of data about brGDGT in different environments.xlsx](#)

The copyright of individual parts of the supplement might differ from the CC BY 4.0 License.
