# Supplementary material for: Predominance of hexamethylated 6-methyl branched glycerol dialkyl glycerol tetraethers in the Mariana Trench: source and environmental implication
Source: Copernicus journal article supplement (doi:10.5194/bg-17-2135-2020), 2020-04-17
Supplement: Supplementary file 2 [file bg-17-2135-2020-supplement.zip]

Archive with 2 entries (2 files):
- Xiao et al., Supplementary Table of data about brGDGT in different environments.xlsx
- bg-17-2135-2020-supplement-title-page.pdf
