# Supplementary material for: Predominance of hexamethylated 6-methyl branched glycerol dialkyl glycerol tetraethers in the Mariana Trench: source and environmental implication
Source: Copernicus journal article supplement (doi:10.5194/bg-17-2135-2020), 2020-04-17
Supplement: Supplementary file 2 [file bg-17-2135-2020-supplement.zip › Xiao et al., Supplementary Table of data about brGDGT in different environments.xlsx]

## Sheet: Supplementary Table
Sample name	N	E	GDGT-1a	GDGT-1b	GDGT-1c	GDGT-2a	GDGT-2a'	GDGT-2b	GDGT-2b'	GDGT-2c	GDGT-2c'	GDGT-3a	GDGT-3a'	GDGT-3b	GDGT-3b'	GDGT-3c	GDGT-3c'	Reference
Mariana Trench																			OC (wt. %)	TN (wt. %)	OC/TN (mol/mol)	ON/OC(mol/mol)	δ13C	BIT	(IIIa+IIIa')/(IIa+IIa')	Tetramethylated%	Pentamethylated%	Hexamethylated%	#ringstetra
MT 0-2	11.4308	142.363	13.5518	2.71651	1.48646	0	10.4373	0	0	0	0	0	71.8079	0	0	0	0	This study	0.306535	0.0548423	6.52097	0.153351	-20.0206	0.0474133	6.87992	17.7547	10.4373	71.8079	0.320446
MT 2-3	11.4308	142.363	13.541	2.40654	1.58662	0	12.1414	0	1.30282	0	0	0	69.0216	0	0	0	0	This study	0.273281	0.0526655	6.05383	0.165185	-19.658	0.0316006	5.68479	17.5341	13.4443	69.0216	0.318224
MT 3-4	11.4308	142.363	11.0738	1.37462	0.639977	0	9.48185	0	0.574966	0	0	0	76.2166	0	0.638215	0	0	This study	0.28868	0.0491873	6.84717	0.146046	-19.5547	0.0235164	8.03815	13.0884	10.0568	76.8548	0.202819
MT 4-5	11.4308	142.363	14.152	1.38666	0.926607	0	9.19861	0	0.418479	0	0	0	73.9177	0	0	0	0	This study	0.270136	0.0545475	5.77768	0.17308	-19.8398	0.0231425	8.03575	16.4652	9.61709	73.9177	0.196771
MT 5-6	11.4308	142.363	11.0751	1.95523	0.823914	0	10.3055	0	0.839774	0	0	0	75.0004	0	0	0	0	This study	0.290672	0.0553419	6.12768	0.163194	-19.938	0.022798	7.27771	13.8543	11.1453	75.0004	0.260068
MT 6-7	11.4308	142.363	11.1698	2.08905	0.916936	0	9.11906	0	0	0	0	0	75.9529	0	0.752207	0	0	This study	0.300107	0.0623379	5.61657	0.178045	-19.4737	0.028165	8.32903	14.1758	9.11906	76.7051	0.276733
MT 7-8	11.4308	142.363	13.4327	1.46369	1.02905	0	11.3089	0	1.24331	0	0	0	71.5224	0	0	0	0	This study	0.268915	0.0431383	7.27277	0.137499	-19.5447	0.0216284	6.32445	15.9254	12.5522	71.5224	0.221144
MT 8-9	11.4308	142.363	13.0487	2.2284	1.12569	0	12.6872	0	0	0	0	0	70.91	0	0	0	0	This study	0.292481	0.0492691	6.9258	0.144388	-19.8249	0.0210738	5.58911	16.4028	12.6872	70.91	0.273111
MT 9-10	11.4308	142.363	11.7995	1.96793	0.656525	0	9.24919	0	0	0	0	0	76.3268	0	0	0	0	This study	0.28388	0.0427665	7.74422	0.129129	-20.0922	0.0241989	8.25227	14.424	9.24919	76.3268	0.227467
MT 10-11	11.4308	142.363	11.797	1.83484	1.00488	0	10.6035	0	1.03968	0	0.445788	0	73.2743	0	0	0	0	This study	0.260636	0.0364469	8.34295	0.119862	-20.2704	0.0267482	6.91037	14.6367	12.089	73.2743	0.262667
SOIL																			CBT'	IBT	CBT5me	pH			IIIA+A'/IIA+A'	Tetramethylated%	Pentamethylated%	Hexamethylated%	#ringstetra
Australia-17	-34.72	148.33	45	13	1	16	15	1	3	0	0	3	2	0	0	0	0	Occurrence and abundance of 6-methyl branched glycerol dialkyl glycerol tetraethers in soils: Implications for palaeoclimate reconstruction	-0.483961	0.0483047	0.639202	6.4			0.16129	59	35	5	0.254237
Australia-4	-26.72	150.6	52	2	0	26	13	1	1	0	0	3	3	0	0	0	0	Occurrence and abundance of 7-methyl branched glycerol dialkyl glycerol tetraethers in soils: Implications for palaeoclimate reconstruction	-0.678036	0.258278	1.41497	6.6			0.153846	54	41	6	0.037037
Brazil-1	-22.75	-43.68	92	1	0	5	2	0	0	0	0	0	0	0	0	0	0	Occurrence and abundance of 8-methyl branched glycerol dialkyl glycerol tetraethers in soils: Implications for palaeoclimate reconstruction	-1.68574	0.39794	1.98677	4.5			0	93	7	0	0.0107527
Brazil-12	-2.6	-54.95	59	22	7	3	4	2	2	0	0	0	1	0	0	0	0	Occurrence and abundance of 9-methyl branched glycerol dialkyl glycerol tetraethers in soils: Implications for palaeoclimate reconstruction	-0.646264	-0.221849	0.41218	6.2			0.142857	88	11	1	0.409091
Brazil-13	-2.9	-54.93	93	2	2	4	0	0	0	0	0	0	0	0	0	0	0	Occurrence and abundance of 10-methyl branched glycerol dialkyl glycerol tetraethers in soils: Implications for palaeoclimate reconstruction	-1.68574	#NUM!	1.68574	3.9			0	97	4	0	0.0618557
Brazil-14	-15.6	-47.7	91	0	0	6	2	0	0	0	0	0	0	0	0	0	0	Occurrence and abundance of 11-methyl branched glycerol dialkyl glycerol tetraethers in soils: Implications for palaeoclimate reconstruction	-1.68574	0.477121	#NUM!	4			0	91	8	0	0
Brazil-28	-12	-50	82	8	3	2	3	0	1	0	0	0	0	0	0	0	0	Occurrence and abundance of 12-methyl branched glycerol dialkyl glycerol tetraethers in soils: Implications for palaeoclimate reconstruction	-1.07918	-0.176091	1.02119	5.9			0	93	6	0	0.150538
Brazil-3	-21.13	-42.8	94	2	1	3	1	0	0	0	0	0	0	0	0	0	0	Occurrence and abundance of 13-methyl branched glycerol dialkyl glycerol tetraethers in soils: Implications for palaeoclimate reconstruction	-1.68574	0.477121	1.68574	5.1			0	97	4	0	0.0412371
Brazil-6	-22.55	-50.32	91	1	1	6	1	0	0	0	0	0	0	0	0	0	0	Occurrence and abundance of 14-methyl branched glycerol dialkyl glycerol tetraethers in soils: Implications for palaeoclimate reconstruction	-1.68574	0.778151	1.98677	5.2			0	93	7	0	0.0322581
Cameroon-1	4.23	9.33	54	24	6	5	6	2	3	0	0	1	1	0	0	0	0	Occurrence and abundance of 15-methyl branched glycerol dialkyl glycerol tetraethers in soils: Implications for palaeoclimate reconstruction	-0.574031	-0.0669468	0.355879	6.4			0.181818	84	16	2	0.428571
Canada-14	45.42	-63.42	57	2	3	36	0	1	0	0	0	2	0	0	0	0	0	Occurrence and abundance of 16-methyl branched glycerol dialkyl glycerol tetraethers in soils: Implications for palaeoclimate reconstruction	-1.5006	#NUM!	1.49136	4			0.0555556	62	37	2	0.129032
Canada-17	49.95	-98.18	14	9	1	13	21	9	11	0	1	6	14	1	1	0	0	Occurrence and abundance of 17-methyl branched glycerol dialkyl glycerol tetraethers in soils: Implications for palaeoclimate reconstruction	0.171682	-0.265314	0.176091	7.7			0.588235	24	55	22	0.458333
Canada-24	49.25	-122.38	49	3	1	36	1	1	0	0	0	8	1	0	0	0	0	Occurrence and abundance of 18-methyl branched glycerol dialkyl glycerol tetraethers in soils: Implications for palaeoclimate reconstruction	-1.49136	1.34242	1.32736	5			0.243243	53	38	9	0.0943396
China-19	18.9	109.5	93	2	1	4	1	0	0	0	0	0	0	0	0	0	0	Occurrence and abundance of 19-methyl branched glycerol dialkyl glycerol tetraethers in soils: Implications for palaeoclimate reconstruction	-1.68574	0.60206	1.68574	4.6			0	96	5	0	0.0416667
China-20	18.77	110.33	89	2	1	7	1	0	0	0	0	0	0	0	0	0	0	Occurrence and abundance of 20-methyl branched glycerol dialkyl glycerol tetraethers in soils: Implications for palaeoclimate reconstruction	-1.68124	0.845098	1.68124	3.9			0	92	8	0	0.0434783
China-23	28.22	116.92	86	2	1	6	4	1	0	0	0	1	1	0	0	0	0	Occurrence and abundance of 21-methyl branched glycerol dialkyl glycerol tetraethers in soils: Implications for palaeoclimate reconstruction	-1.19033	0.146128	1.48667	4.5			0.2	89	11	2	0.0449438
China-25	28.48	116.27	73	7	1	8	8	1	1	0	0	1	1	0	0	0	0	Occurrence and abundance of 22-methyl branched glycerol dialkyl glycerol tetraethers in soils: Implications for palaeoclimate reconstruction	-0.872421	0	1.0054	5.5			0.125	81	18	2	0.111111
China-27	27.09	117.75	83	2	0	11	2	0	0	0	0	1	0	0	0	0	0	Occurrence and abundance of 23-methyl branched glycerol dialkyl glycerol tetraethers in soils: Implications for palaeoclimate reconstruction	-1.67669	0.778151	1.6721	4.7			0.0769231	85	13	1	0.0235294
China-31	24.38	114.28	66	18	3	5	4	1	1	0	0	1	1	0	0	0	0	Occurrence and abundance of 24-methyl branched glycerol dialkyl glycerol tetraethers in soils: Implications for palaeoclimate reconstruction	-0.90309	0.0791812	0.572505	6.1			0.222222	87	11	2	0.275862
China-32	23.65	113.65	89	2	1	5	1	0	0	0	0	1	1	0	0	0	0	Occurrence and abundance of 25-methyl branched glycerol dialkyl glycerol tetraethers in soils: Implications for palaeoclimate reconstruction	-1.5006	0.477121	1.6721	4.3			0.333333	92	6	2	0.0434783
China-4	28.2	113.83	86	1	0	8	5	0	0	0	0	1	1	0	0	0	0	Occurrence and abundance of 26-methyl branched glycerol dialkyl glycerol tetraethers in soils: Implications for palaeoclimate reconstruction	-1.19957	0.176091	1.97313	4.9			0.153846	87	13	2	0.0114943
China-49	26.38	106.43	20	31	6	6	10	3	16	0	1	2	3	1	1	0	0	Occurrence and abundance of 27-methyl branched glycerol dialkyl glycerol tetraethers in soils: Implications for palaeoclimate reconstruction	0.121044	-0.210853	-0.116506	6.5			0.3125	57	36	7	0.754386
China-6	24.82	110.52	54	18	4	7	11	2	2	0	0	1	1	0	0	0	0	Occurrence and abundance of 28-methyl branched glycerol dialkyl glycerol tetraethers in soils: Implications for palaeoclimate reconstruction	-0.537119	-0.176091	0.4843	7.1			0.111111	76	22	2	0.342105
China-MG1180	29.62	102.17	37	8	0	15	24	1	5	0	0	4	7	0	0	0	0	Occurrence and abundance of 29-methyl branched glycerol dialkyl glycerol tetraethers in soils: Implications for palaeoclimate reconstruction	-0.191886	-0.212608	0.761761	7.9			0.282051	45	45	11	0.177778
China-MG1220	29.6	102.17	51	13	2	10	14	2	5	0	0	1	2	0	0	0	0	Occurrence and abundance of 30-methyl branched glycerol dialkyl glycerol tetraethers in soils: Implications for palaeoclimate reconstruction	-0.430664	-0.162727	0.609239	7.3			0.125	66	31	3	0.257576
China-MG1515	29.63	102.13	83	0	0	14	1	0	0	0	0	1	0	0	0	0	0	Occurrence and abundance of 31-methyl branched glycerol dialkyl glycerol tetraethers in soils: Implications for palaeoclimate reconstruction	-1.99123	1.17609	#NUM!	6.4			0.0666667	83	15	1	0
China-MG1645	29.61	102.11	20	17	3	10	17	8	11	1	1	4	7	1	2	0	0	Occurrence and abundance of 32-methyl branched glycerol dialkyl glycerol tetraethers in soils: Implications for palaeoclimate reconstruction	0.0813049	-0.234083	0.0791812	7.5			0.407407	40	48	14	0.575
China-MG1740	29.62	102.11	33	14	2	10	17	5	8	0	1	3	5	0	1	0	0	Occurrence and abundance of 33-methyl branched glycerol dialkyl glycerol tetraethers in soils: Implications for palaeoclimate reconstruction	-0.131279	-0.228479	0.354715	6.7			0.296296	49	41	9	0.367347
China-MG1800	29.61	102.09	20	11	2	11	23	6	9	1	1	4	10	0	1	0	0	Occurrence and abundance of 34-methyl branched glycerol dialkyl glycerol tetraethers in soils: Implications for palaeoclimate reconstruction	0.11869	-0.342423	0.260913	7.1			0.411765	33	51	15	0.454545
China-MG1850	29.61	102.09	20	12	2	12	21	6	11	1	1	5	8	1	1	0	0	Occurrence and abundance of 35-methyl branched glycerol dialkyl glycerol tetraethers in soils: Implications for palaeoclimate reconstruction	0.075251	-0.231949	0.249877	7.5			0.393939	34	52	15	0.470588
China-MG1915	29.61	102.09	43	10	2	23	11	2	2	0	0	3	2	0	0	0	0	Occurrence and abundance of 36-methyl branched glycerol dialkyl glycerol tetraethers in soils: Implications for palaeoclimate reconstruction	-0.6084	0.30103	0.740363	6.9			0.147059	55	38	5	0.254545
China-MG1973	29.6	102.07	11	12	2	7	23	10	13	1	1	4	13	1	2	0	0	Occurrence and abundance of 37-methyl branched glycerol dialkyl glycerol tetraethers in soils: Implications for palaeoclimate reconstruction	0.389971	-0.51491	-0.0871502	7.7			0.566667	25	55	20	0.64
China-MG2005	29.6	102.07	31	8	2	22	16	4	5	1	0	4	6	0	1	0	0	Occurrence and abundance of 38-methyl branched glycerol dialkyl glycerol tetraethers in soils: Implications for palaeoclimate reconstruction	-0.278754	0.0725507	0.645095	7.5			0.263158	41	48	11	0.292683
China-MG2115	29.6	102.07	11	11	3	9	17	11	13	1	2	6	12	1	3	0	0	Occurrence and abundance of 39-methyl branched glycerol dialkyl glycerol tetraethers in soils: Implications for palaeoclimate reconstruction	0.283997	-0.286307	-0.0413927	7.1			0.692308	25	53	22	0.68
China-MG2160	29.6	102.06	22	11	3	14	20	6	8	1	1	5	9	1	1	0	0	Occurrence and abundance of 40-methyl branched glycerol dialkyl glycerol tetraethers in soils: Implications for palaeoclimate reconstruction	0.0104654	-0.183644	0.325854	7.9			0.411765	36	50	16	0.472222
China-MG2220	29.6	102.05	30	6	2	25	17	3	4	1	0	6	7	0	0	0	0	Occurrence and abundance of 41-methyl branched glycerol dialkyl glycerol tetraethers in soils: Implications for palaeoclimate reconstruction	-0.308209	0.11115	0.78612	6.6			0.309524	38	50	13	0.263158
China-MG2300	29.6	102.05	37	4	1	28	13	1	2	0	0	8	6	0	0	0	0	Occurrence and abundance of 42-methyl branched glycerol dialkyl glycerol tetraethers in soils: Implications for palaeoclimate reconstruction	-0.5209	0.277549	1.11394	6.7			0.341463	42	44	14	0.142857
China-MG2350	29.6	102.05	29	7	2	20	18	3	5	1	0	5	9	0	1	0	0	Occurrence and abundance of 43-methyl branched glycerol dialkyl glycerol tetraethers in soils: Implications for palaeoclimate reconstruction	-0.188326	-0.0334238	0.690196	6.9			0.368421	38	47	15	0.289474
China-MG2420	29.59	102.04	22	5	1	22	15	4	5	1	0	10	12	1	1	1	0	Occurrence and abundance of 44-methyl branched glycerol dialkyl glycerol tetraethers in soils: Implications for palaeoclimate reconstruction	-0.200915	0.0737862	0.68921	7.2			0.594595	28	47	25	0.25
China-MG2470	29.59	102.04	20	6	1	16	22	4	7	1	1	6	15	0	1	0	0	Occurrence and abundance of 45-methyl branched glycerol dialkyl glycerol tetraethers in soils: Implications for palaeoclimate reconstruction	0.0488486	-0.225779	0.556303	7.9			0.552632	27	51	22	0.296296
China-MG2540	29.59	102.03	16	8	1	11	16	8	11	1	1	7	14	1	3	0	0	Occurrence and abundance of 46-methyl branched glycerol dialkyl glycerol tetraethers in soils: Implications for palaeoclimate reconstruction	0.131279	-0.221849	0.227244	7.8			0.777778	25	48	25	0.4
China-MG2620	29.59	102.03	23	9	3	19	15	6	5	1	1	8	8	1	1	0	0	Occurrence and abundance of 47-methyl branched glycerol dialkyl glycerol tetraethers in soils: Implications for palaeoclimate reconstruction	-0.180456	0.0696359	0.447158	6.5			0.470588	35	47	18	0.428571
China-MG2742	29.59	102.03	64	3	1	27	1	1	0	1	0	3	0	0	0	0	0	Occurrence and abundance of 48-methyl branched glycerol dialkyl glycerol tetraethers in soils: Implications for palaeoclimate reconstruction	-1.6721	1.47712	1.35698	4.4			0.107143	68	30	3	0.0735294
China-MG2764	29.58	102.02	40	3	1	38	5	1	0	1	0	10	1	0	0	0	0	Occurrence and abundance of 49-methyl branched glycerol dialkyl glycerol tetraethers in soils: Implications for palaeoclimate reconstruction	-1.09938	0.90309	1.29003	5.9			0.255814	44	45	11	0.113636
China-MG2808	29.58	102.01	53	3	1	31	3	1	0	1	0	6	1	0	0	0	0	Occurrence and abundance of 50-methyl branched glycerol dialkyl glycerol tetraethers in soils: Implications for palaeoclimate reconstruction	-1.25527	0.966142	1.32222	5			0.205882	57	36	7	0.0877193
China-MG2920	29.58	102.01	42	3	1	42	8	1	0	0	0	0	3	0	0	0	0	Occurrence and abundance of 51-methyl branched glycerol dialkyl glycerol tetraethers in soils: Implications for palaeoclimate reconstruction	-0.845098	0.581857	1.32222	5.2			0.06	46	51	3	0.108696
China-MG2960	29.58	102	24	7	4	23	15	6	3	2	0	10	6	0	1	0	0	Occurrence and abundance of 52-methyl branched glycerol dialkyl glycerol tetraethers in soils: Implications for palaeoclimate reconstruction	-0.293477	0.196295	0.558155	7.2			0.421053	35	49	17	0.428571
China-MG3049	29.58	112	46	2	1	42	0	1	0	1	0	8	0	0	0	0	0	Occurrence and abundance of 53-methyl branched glycerol dialkyl glycerol tetraethers in soils: Implications for palaeoclimate reconstruction	-1.98227	#NUM!	1.46736	4.5			0.190476	49	44	8	0.0816327
China-MG3065	29.58	101.99	28	2	0	36	8	2	2	0	0	15	5	0	1	0	0	Occurrence and abundance of 54-methyl branched glycerol dialkyl glycerol tetraethers in soils: Implications for palaeoclimate reconstruction	-0.693507	0.593627	1.20412	6.4			0.454545	30	48	21	0.0666667
China-MG3119	29.58	101.99	37	2	0	40	5	1	1	1	0	12	1	0	0	0	0	Occurrence and abundance of 55-methyl branched glycerol dialkyl glycerol tetraethers in soils: Implications for palaeoclimate reconstruction	-1.10429	0.937852	1.40937	5.6			0.288889	39	48	13	0.0512821
China-MG3140	29.57	101.98	57	2	0	34	1	1	0	0	0	4	1	0	0	0	0	Occurrence and abundance of 56-methyl branched glycerol dialkyl glycerol tetraethers in soils: Implications for palaeoclimate reconstruction	-1.67669	1.27875	1.48192	4.9			0.142857	59	36	5	0.0338983
China-MG3145	29.58	101.99	19	3	1	25	12	5	5	1	0	15	13	1	1	0	0	Occurrence and abundance of 57-methyl branched glycerol dialkyl glycerol tetraethers in soils: Implications for palaeoclimate reconstruction	-0.265702	0.20412	0.740363	7.3			0.756757	23	48	30	0.217391
China-MG3188	29.58	101.99	41	2	0	40	2	1	0	0	0	13	0	0	0	0	0	Occurrence and abundance of 58-methyl branched glycerol dialkyl glycerol tetraethers in soils: Implications for palaeoclimate reconstruction	-1.6721	1.42325	1.43136	5.3			0.309524	43	43	13	0.0465116
China-MG3209	29.57	101.98	31	2	0	37	4	1	0	0	0	24	1	0	0	0	0	Occurrence and abundance of 59-methyl branched glycerol dialkyl glycerol tetraethers in soils: Implications for palaeoclimate reconstruction	-1.26482	1.08636	1.35539	5			0.609756	33	42	25	0.0606061
China-MG3676	29.55	101.97	35	1	0	31	10	1	0	0	0	18	3	0	0	0	0	Occurrence and abundance of 60-methyl branched glycerol dialkyl glycerol tetraethers in soils: Implications for palaeoclimate reconstruction	-0.810336	0.576253	1.51851	6.6			0.512195	36	42	21	0.0277778
China-MG3769	29.55	101.97	36	1	0	40	4	1	0	0	0	16	1	0	0	0	0	Occurrence and abundance of 61-methyl branched glycerol dialkyl glycerol tetraethers in soils: Implications for palaeoclimate reconstruction	-1.26482	1.04922	1.57978	6.3			0.386364	37	45	17	0.027027
China-MG3819	29.55	101.96	37	2	0	40	3	1	0	0	0	17	1	0	0	0	0	Occurrence and abundance of 62-methyl branched glycerol dialkyl glycerol tetraethers in soils: Implications for palaeoclimate reconstruction	-1.37107	1.15381	1.40937	5			0.418605	39	44	18	0.0512821
Colombia-12	1.33	-77.33	81	3	1	11	3	0	0	0	0	0	0	0	0	0	0	Occurrence and abundance of 63-methyl branched glycerol dialkyl glycerol tetraethers in soils: Implications for palaeoclimate reconstruction	-1.36173	0.564271	1.48667	4.8			0	85	14	0	0.0588235
Colombia-14	1.17	-77.37	40	3	1	37	2	3	0	0	0	11	1	0	0	0	0	Occurrence and abundance of 64-methyl branched glycerol dialkyl glycerol tetraethers in soils: Implications for palaeoclimate reconstruction	-1.34242	1.20412	1.10834	5.5			0.307692	44	42	12	0.113636
Colombia-7	-0.47	-72.23	96	1	1	2	0	0	0	0	0	0	0	0	0	0	0	Occurrence and abundance of 65-methyl branched glycerol dialkyl glycerol tetraethers in soils: Implications for palaeoclimate reconstruction	-1.99123	#NUM!	1.99123	4.2			0	98	2	0	0.0306122
Colombia-9	-1.47	-72.22	97	1	1	1	0	0	0	0	0	0	0	0	0	0	0	Occurrence and abundance of 66-methyl branched glycerol dialkyl glycerol tetraethers in soils: Implications for palaeoclimate reconstruction	-1.99123	#NUM!	1.99123	3.8			0	99	1	0	0.030303
Ecuador-19	-2.12	-78.72	30	13	6	13	18	3	8	2	0	3	4	0	0	0	0	Occurrence and abundance of 67-methyl branched glycerol dialkyl glycerol tetraethers in soils: Implications for palaeoclimate reconstruction	-0.106455	-0.138303	0.429348	6.6			0.225806	49	44	7	0.510204
Ecuador-6	-0.52	-76.93	86	6	1	4	2	0	0	0	0	0	0	0	0	0	0	Occurrence and abundance of 68-methyl branched glycerol dialkyl glycerol tetraethers in soils: Implications for palaeoclimate reconstruction	-1.47712	0.30103	1.17609	4.9			0	93	6	0	0.0860215
Ecuador-7	-0.32	-76.83	90	4	1	3	2	0	0	0	0	0	0	0	0	0	0	Occurrence and abundance of 69-methyl branched glycerol dialkyl glycerol tetraethers in soils: Implications for palaeoclimate reconstruction	-1.49136	0.176091	1.36642	4.6			0	95	5	0	0.0631579
Egypt-1	28.53	33.97	34	25	4	2	21	2	8	0	1	0	3	0	1	0	0	Occurrence and abundance of 70-methyl branched glycerol dialkyl glycerol tetraethers in soils: Implications for palaeoclimate reconstruction	0.0234811	-1.07918	0.124939	7.6			0.130435	63	34	4	0.52381
Egypt-2	28.53	33.97	18	0	0	0	39	0	0	0	0	0	43	0	0	0	0	Occurrence and abundance of 71-methyl branched glycerol dialkyl glycerol tetraethers in soils: Implications for palaeoclimate reconstruction	0.658541	#DIV/0!	#NUM!				1.10256	18	39	43	0
Finland-2	61.24	34.1	71	0	0	26	0	0	0	0	0	2	0	0	0	0	0	Occurrence and abundance of 72-methyl branched glycerol dialkyl glycerol tetraethers in soils: Implications for palaeoclimate reconstruction	#NUM!	#NUM!	#NUM!	3.7			0.0769231	71	26	2	0
France-15	45.05	2.55	44	2	1	38	4	1	0	0	0	9	1	0	0	0	0	Occurrence and abundance of 73-methyl branched glycerol dialkyl glycerol tetraethers in soils: Implications for palaeoclimate reconstruction	-1.18089	0.973128	1.43669	4.7			0.238095	47	43	10	0.0851064
France-TESO1	42.56	1.98	39	2	1	39	4	1	0	0	0	12	1	0	0	0	0	Occurrence and abundance of 74-methyl branched glycerol dialkyl glycerol tetraethers in soils: Implications for palaeoclimate reconstruction	-1.17609	1.0086	1.41497	4.92			0.302326	42	44	13	0.0952381
France-TESO10	42.49	2.35	19	4	1	18	19	2	2	0	0	10	24	0	0	0	0	Occurrence and abundance of 75-methyl branched glycerol dialkyl glycerol tetraethers in soils: Implications for palaeoclimate reconstruction	-0.00934003	-0.18631	0.79005	6.46			0.918919	24	41	34	0.25
France-TESO11	42.56	2.39	16	5	1	15	21	3	4	1	0	8	24	0	1	0	0	Occurrence and abundance of 76-methyl branched glycerol dialkyl glycerol tetraethers in soils: Implications for palaeoclimate reconstruction	0.116506	-0.291485	0.588272	6.83			0.888889	22	44	33	0.318182
France-TESO12	42.53	2.34	18	5	1	17	23	3	3	0	0	8	21	0	1	0	0	Occurrence and abundance of 77-methyl branched glycerol dialkyl glycerol tetraethers in soils: Implications for palaeoclimate reconstruction	0.0567276	-0.245513	0.640978	6.59			0.725	24	46	30	0.291667
France-TESO13	42.57	2.38	18	11	2	18	18	9	7	1	0	7	7	0	1	0	0	Occurrence and abundance of 78-methyl branched glycerol dialkyl glycerol tetraethers in soils: Implications for palaeoclimate reconstruction	-0.0894004	0	0.255273	6.32			0.388889	31	53	15	0.483871
France-TESO14	42.58	2.37	14	4	1	14	26	2	5	0	0	7	24	0	1	0	0	Occurrence and abundance of 79-methyl branched glycerol dialkyl glycerol tetraethers in soils: Implications for palaeoclimate reconstruction	0.211807	-0.376751	0.669007	7.68			0.775	19	47	32	0.315789
France-TESO14B	42.58	2.37	14	7	1	10	26	4	10	0	1	6	20	0	2	0	0	Occurrence and abundance of 80-methyl branched glycerol dialkyl glycerol tetraethers in soils: Implications for palaeoclimate reconstruction	0.30103	-0.458638	0.338819	7.81			0.722222	22	51	28	0.409091
France-TESO15	42.65	2.49	19	5	1	18	20	3	5	0	0	9	19	0	1	0	0	Occurrence and abundance of 81-methyl branched glycerol dialkyl glycerol tetraethers in soils: Implications for palaeoclimate reconstruction	0	-0.159701	0.665112	6.39			0.736842	25	46	29	0.28
France-TESO16	42.64	2.3	21	7	2	23	18	4	3	1	0	10	12	0	1	0	0	Occurrence and abundance of 82-methyl branched glycerol dialkyl glycerol tetraethers in soils: Implications for palaeoclimate reconstruction	-0.176091	0.0413927	0.60206	6.39			0.536585	30	49	23	0.366667
France-TESO18	42.68	2.27	43	2	0	35	5	1	0	0	0	11	1	0	0	0	0	Occurrence and abundance of 83-methyl branched glycerol dialkyl glycerol tetraethers in soils: Implications for palaeoclimate reconstruction	-1.17124	0.884607	1.41497	5.52			0.3	45	41	12	0.0444444
France-TESO19	42.67	2.61	14	8	2	4	33	4	11	0	0	3	18	1	2	0	0	Occurrence and abundance of 84-methyl branched glycerol dialkyl glycerol tetraethers in soils: Implications for palaeoclimate reconstruction	0.497325	-0.862472	0.176091	7.87			0.567568	24	52	24	0.5
France-TESO2	42.57	1.98	33	2	1	43	3	1	0	0	0	16	1	0	0	0	0	Occurrence and abundance of 85-methyl branched glycerol dialkyl glycerol tetraethers in soils: Implications for palaeoclimate reconstruction	-1.26482	1.16879	1.40369	4.67			0.369565	36	47	17	0.111111
France-TESO22B	42.67	2.609	20	8	1	15	21	4	6	1	0	7	16	0	1	0	0	Occurrence and abundance of 86-methyl branched glycerol dialkyl glycerol tetraethers in soils: Implications for palaeoclimate reconstruction	0.0299632	-0.225779	0.464887	8.48			0.638889	29	47	24	0.344828
France-TESO24	42.7	2.67	19	5	1	16	22	3	6	0	0	9	19	0	1	0	0	Occurrence and abundance of 87-methyl branched glycerol dialkyl glycerol tetraethers in soils: Implications for palaeoclimate reconstruction	0.0467434	-0.214844	0.640978	7.77			0.736842	25	47	29	0.28
France-TESO25	42.71	2.68	18	7	1	7	31	2	11	0	1	3	16	0	2	0	0	Occurrence and abundance of 88-methyl branched glycerol dialkyl glycerol tetraethers in soils: Implications for palaeoclimate reconstruction	0.345234	-0.672098	0.443697	7.9			0.5	26	52	21	0.346154
France-TESO26	42.69	2.7	16	10	2	14	20	6	9	1	1	8	13	0	2	0	0	Occurrence and abundance of 89-methyl branched glycerol dialkyl glycerol tetraethers in soils: Implications for palaeoclimate reconstruction	0.0923143	-0.176091	0.273001	7.26			0.617647	28	51	23	0.5
France-TESO28	42.7	2.61	17	9	1	11	23	6	8	0	0	6	15	0	2	0	0	Occurrence and abundance of 90-methyl branched glycerol dialkyl glycerol tetraethers in soils: Implications for palaeoclimate reconstruction	0.158717	-0.349335	0.271067	8.43			0.617647	27	48	23	0.407407
France-TESO3	42.57	1.97	38	3	1	43	3	1	0	1	0	10	1	0	0	0	0	Occurrence and abundance of 91-methyl branched glycerol dialkyl glycerol tetraethers in soils: Implications for palaeoclimate reconstruction	-1.26007	1.12222	1.30643	4.65			0.23913	42	48	11	0.119048
France-TESO30	42.67	2.61	29	7	1	20	20	3	6	0	0	7	9	0	0	0	0	Occurrence and abundance of 92-methyl branched glycerol dialkyl glycerol tetraethers in soils: Implications for palaeoclimate reconstruction	-0.191886	-0.0310342	0.690196	7.4			0.4	37	49	16	0.243243
France-TESO31	42.69	2.79	17	14	1	4	26	1	15	0	1	4	15	0	2	0	0	Occurrence and abundance of 93-methyl branched glycerol dialkyl glycerol tetraethers in soils: Implications for palaeoclimate reconstruction	0.380211	-0.709694	0.146128	7.51			0.633333	32	47	21	0.5
France-TESO33	42.69	2.791	58	5	2	29	0	1	1	0	0	3	1	0	0	0	0	Occurrence and abundance of 94-methyl branched glycerol dialkyl glycerol tetraethers in soils: Implications for palaeoclimate reconstruction	-1.35218	1.50515	1.16137	7.78			0.137931	65	31	4	0.138462
France-TESO34	42.69	2.82	14	14	4	13	13	10	10	1	2	7	10	1	2	0	0	Occurrence and abundance of 95-methyl branched glycerol dialkyl glycerol tetraethers in soils: Implications for palaeoclimate reconstruction	0.0813049	-0.0606978	0.0511525	8.11			0.653846	32	49	20	0.6875
France-TESO36	42.71	3.04	18	7	1	13	24	6	8	0	1	7	15	0	0	0	0	Occurrence and abundance of 96-methyl branched glycerol dialkyl glycerol tetraethers in soils: Implications for palaeoclimate reconstruction	0.110412	-0.290035	0.377418	7.47			0.594595	26	52	22	0.346154
France-TESO4	42.57	1.97	34	1	0	47	0	1	0	0	0	16	1	0	0	0	0	Occurrence and abundance of 97-methyl branched glycerol dialkyl glycerol tetraethers in soils: Implications for palaeoclimate reconstruction	-1.98677	1.79934	1.60746	4.1			0.361702	35	48	17	0.0285714
France-TESO43	42.71	2.98	20	6	1	20	20	5	6	0	0	9	10	1	1	0	0	Occurrence and abundance of 98-methyl branched glycerol dialkyl glycerol tetraethers in soils: Implications for palaeoclimate reconstruction	-0.110412	-0.0147233	0.560667	6.9			0.475	27	51	21	0.296296
France-TESO43B	42.71	2.98	18	6	1	21	21	4	7	0	0	9	12	0	1	0	0	Occurrence and abundance of 99-methyl branched glycerol dialkyl glycerol tetraethers in soils: Implications for palaeoclimate reconstruction	-0.0579919	-0.0413927	0.591065	7.47			0.5	25	53	22	0.32
France-TESO47	42.56	2.31	22	12	2	10	21	5	9	0	1	4	11	0	2	0	0	Occurrence and abundance of 100-methyl branched glycerol dialkyl glycerol tetraethers in soils: Implications for palaeoclimate reconstruction	0.106455	-0.359022	0.274701	6.98			0.483871	36	46	17	0.444444
France-TESO48	42.53	2.08	36	3	1	40	4	1	0	0	0	14	1	0	0	1	0	Occurrence and abundance of 101-methyl branched glycerol dialkyl glycerol tetraethers in soils: Implications for palaeoclimate reconstruction	-1.17609	1.03342	1.27875	4.64			0.340909	40	45	16	0.125
France-TESO49	42.51	2.11	38	3	1	44	2	2	0	1	0	9	1	0	0	0	0	Occurrence and abundance of 102-methyl branched glycerol dialkyl glycerol tetraethers in soils: Implications for palaeoclimate reconstruction	-1.35698	1.24715	1.21484	4.82			0.217391	42	49	10	0.119048
France-TESO5	42.57	1.97	40	5	1	32	5	2	0	1	0	11	2	1	0	0	0	Occurrence and abundance of 103-methyl branched glycerol dialkyl glycerol tetraethers in soils: Implications for palaeoclimate reconstruction	-1.01599	0.78837	1.01223	4.18			0.351351	46	40	14	0.152174
France-TESO51	42	2.22	16	5	1	16	20	3	4	1	0	9	23	0	1	0	0	Occurrence and abundance of 104-methyl branched glycerol dialkyl glycerol tetraethers in soils: Implications for palaeoclimate reconstruction	0.0774122	-0.235528	0.60206	6.9			0.888889	22	44	33	0.318182
France-TESO6	42.57	1.99	33	2	1	42	7	1	0	0	0	13	1	0	0	0	0	Occurrence and abundance of 105-methyl branched glycerol dialkyl glycerol tetraethers in soils: Implications for palaeoclimate reconstruction	-0.99024	0.837273	1.39794	4.87			0.285714	36	50	14	0.111111
France-TESO7	42.57	2.32	14	13	3	9	16	13	10	1	1	5	11	1	2	0	0	Occurrence and abundance of 106-methyl branched glycerol dialkyl glycerol tetraethers in soils: Implications for palaeoclimate reconstruction	0.18631	-0.285236	-0.0532455	7.48			0.64	30	50	19	0.633333
France-TESO8	42.54	2.27	40	2	1	31	12	1	1	0	0	8	3	0	0	0	0	Occurrence and abundance of 107-methyl branched glycerol dialkyl glycerol tetraethers in soils: Implications for palaeoclimate reconstruction	-0.667178	0.414973	1.37414	5.42			0.255814	43	45	11	0.0930233
Gabon-1	0.52	12.8	87	1	1	9	1	0	0	0	0	1	0	0	0	0	0	Occurrence and abundance of 108-methyl branched glycerol dialkyl glycerol tetraethers in soils: Implications for palaeoclimate reconstruction	-1.68574	1	1.98227	3.3			0.1	89	10	1	0.0337079
Gabon-2	-1.52	14.12	97	1	1	1	0	0	0	0	0	0	0	0	0	0	0	Occurrence and abundance of 109-methyl branched glycerol dialkyl glycerol tetraethers in soils: Implications for palaeoclimate reconstruction	-1.99123	#NUM!	1.99123	5.3			0	99	1	0	0.030303
Gabon-3	-1.68	13.58	98	0	1	1	0	0	0	0	0	0	0	0	0	0	0	Occurrence and abundance of 110-methyl branched glycerol dialkyl glycerol tetraethers in soils: Implications for palaeoclimate reconstruction	-1.99564	#NUM!	#NUM!	4.7			0	99	1	0	0.020202
Gabon-4	-2.22	11.53	93	3	1	2	1	0	0	0	0	0	0	0	0	0	0	Occurrence and abundance of 111-methyl branched glycerol dialkyl glycerol tetraethers in soils: Implications for palaeoclimate reconstruction	-1.67669	0.30103	1.5006	5.3			0	97	3	0	0.0515464
Gabon-5	-0.38	11.52	97	0	0	2	0	0	0	0	0	0	0	0	0	0	0	Occurrence and abundance of 112-methyl branched glycerol dialkyl glycerol tetraethers in soils: Implications for palaeoclimate reconstruction	#NUM!	#NUM!	#NUM!	5.1			0	97	2	0	0
Gabon-6	-0.52	10.28	68	17	4	3	5	1	1	0	0	0	0	0	0	0	0	Occurrence and abundance of 113-methyl branched glycerol dialkyl glycerol tetraethers in soils: Implications for palaeoclimate reconstruction	-0.851258	-0.221849	0.595986	5.9			0	89	10	0	0.280899
Galapagos	-0.85	-89.75	90	1	1	6	1	0	0	0	0	0	0	0	0	0	0	Occurrence and abundance of 114-methyl branched glycerol dialkyl glycerol tetraethers in soils: Implications for palaeoclimate reconstruction	-1.68124	0.778151	1.98227	4.4			0	92	7	0	0.0326087
Germany-G1	48	12	44	3	1	22	6	4	3	1	0	8	6	0	1	0	0	Occurrence and abundance of 115-methyl branched glycerol dialkyl glycerol tetraethers in soils: Implications for palaeoclimate reconstruction	-0.638783	0.39794	0.974446	7.4			0.5	48	36	15	0.104167
Germany-G2	48	12	12	7	1	13	11	14	5	1	1	15	16	2	2	0	0	Occurrence and abundance of 116-methyl branched glycerol dialkyl glycerol tetraethers in soils: Implications for palaeoclimate reconstruction	-0.0457575	0.0157943	0.0757207	7.3			1.29167	20	45	35	0.45
Germany-H1	53.63	9.98	25	12	4	30	7	6	2	1	0	9	3	0	0	0	0	Occurrence and abundance of 117-methyl branched glycerol dialkyl glycerol tetraethers in soils: Implications for palaeoclimate reconstruction	-0.60206	0.591065	0.48509	6.1			0.324324	41	46	12	0.487805
Ghana-2	5	0	95	3	1	1	1	0	0	0	0	0	0	0	0	0	0	Occurrence and abundance of 118-methyl branched glycerol dialkyl glycerol tetraethers in soils: Implications for palaeoclimate reconstruction	-1.68124	0	1.50515	6			0	99	2	0	0.0505051
Greece-13	40.5	23.55	53	0	0	32	6	0	0	0	0	7	2	0	0	0	0	Occurrence and abundance of 119-methyl branched glycerol dialkyl glycerol tetraethers in soils: Implications for palaeoclimate reconstruction	-1.0607	0.687975	#NUM!	5.4			0.236842	53	38	9	0
Greece-5	40.58	22.5	12	7	3	5	34	5	7	0	0	6	22	0	0	0	0	Occurrence and abundance of 120-methyl branched glycerol dialkyl glycerol tetraethers in soils: Implications for palaeoclimate reconstruction	0.457816	-0.706795	0.151268	7.4			0.717949	22	51	28	0.590909
Greenland-5	65.62	-37.67	35	2	1	28	16	2	0	1	0	13	3	0	0	0	0	Occurrence and abundance of 121-methyl branched glycerol dialkyl glycerol tetraethers in soils: Implications for palaeoclimate reconstruction	-0.579784	0.33403	1.19728	5.5			0.363636	38	47	16	0.105263
Iceland-6	65.35	-20.88	28	8	2	31	12	3	2	1	0	10	3	0	0	0	0	Occurrence and abundance of 122-methyl branched glycerol dialkyl glycerol tetraethers in soils: Implications for palaeoclimate reconstruction	-0.560095	0.436693	0.729459	6.1			0.302326	38	49	13	0.315789
Iceland-sa	65.08	-22.75	33	4	1	44	2	1	0	1	0	14	1	0	0	0	0	Occurrence and abundance of 123-methyl branched glycerol dialkyl glycerol tetraethers in soils: Implications for palaeoclimate reconstruction	-1.35698	1.28631	1.18752	5.3			0.326087	38	48	15	0.157895
Ireland-9	53.9	-7.8	53	3	2	36	0	1	0	1	0	4	0	0	0	0	0	Occurrence and abundance of 124-methyl branched glycerol dialkyl glycerol tetraethers in soils: Implications for palaeoclimate reconstruction	-1.66745	#NUM!	1.34733	3.8			0.111111	58	38	4	0.12069
Italy-1	39.67	16.15	44	6	1	17	21	2	2	0	0	4	4	0	0	0	0	Occurrence and abundance of 125-methyl branched glycerol dialkyl glycerol tetraethers in soils: Implications for palaeoclimate reconstruction	-0.365755	-0.0757207	0.88224	6.2			0.210526	51	42	8	0.156863
Italy-11	41.48	13.52	50	2	0	26	13	1	1	0	0	6	3	0	0	0	0	Occurrence and abundance of 126-methyl branched glycerol dialkyl glycerol tetraethers in soils: Implications for palaeoclimate reconstruction	-0.683365	0.30103	1.40369	5.4			0.230769	52	41	9	0.0384615
Italy-14	41.48	13.53	44	4	0	21	20	1	1	0	0	5	4	0	0	0	0	Occurrence and abundance of 127-methyl branched glycerol dialkyl glycerol tetraethers in soils: Implications for palaeoclimate reconstruction	-0.447158	0.0347621	1.11394	5.6			0.219512	48	43	9	0.0833333
Italy-17	41.45	13.62	21	12	3	7	18	5	11	1	1	5	12	1	2	0	0	Occurrence and abundance of 128-methyl branched glycerol dialkyl glycerol tetraethers in soils: Implications for palaeoclimate reconstruction	0.153584	-0.39794	0.216709	7.6			0.68	36	43	20	0.5
Netherlands-B	50.92	4.75	9	10	1	5	20	4	22	1	1	5	17	1	3	0	0	Occurrence and abundance of 129-methyl branched glycerol dialkyl glycerol tetraethers in soils: Implications for palaeoclimate reconstruction	0.527426	-0.568202	0	7.7			0.88	20	53	26	0.6
Netherlands-T5	53.08	4.75	60	2	2	32	0	2	0	1	0	3	0	0	0	0	0	Occurrence and abundance of 130-methyl branched glycerol dialkyl glycerol tetraethers in soils: Implications for palaeoclimate reconstruction	-1.67669	#NUM!	1.36173	4			0.09375	64	35	3	0.09375
Netherlands-T7	53.08	4.75	53	3	1	35	1	2	0	1	0	4	1	0	0	0	0	Occurrence and abundance of 131-methyl branched glycerol dialkyl glycerol tetraethers in soils: Implications for palaeoclimate reconstruction	-1.48667	1.29003	1.24551	3.7			0.138889	57	39	5	0.0877193
Nigeria-15	5.3	6.63	98	1	1	1	0	0	0	0	0	0	0	0	0	0	0	Occurrence and abundance of 132-methyl branched glycerol dialkyl glycerol tetraethers in soils: Implications for palaeoclimate reconstruction	-1.99564	#NUM!	1.99564	4.4			0	100	1	0	0.03
Nigeria-19	6.62	3.5	35	37	7	3	8	3	6	0	1	0	1	0	0	0	0	Occurrence and abundance of 133-methyl branched glycerol dialkyl glycerol tetraethers in soils: Implications for palaeoclimate reconstruction	-0.218056	-0.477121	-0.0222764	7.3			0.0909091	79	21	1	0.64557
Norway-1	63.82	9.68	14	8	1	12	21	8	11	1	1	7	15	1	2	0	0	Occurrence and abundance of 134-methyl branched glycerol dialkyl glycerol tetraethers in soils: Implications for palaeoclimate reconstruction	0.189056	-0.277549	0.210853	7.6			0.666667	23	54	25	0.434783
Norway-3	63.43	10.68	53	3	1	36	0	1	0	1	0	6	0	0	0	0	0	Occurrence and abundance of 135-methyl branched glycerol dialkyl glycerol tetraethers in soils: Implications for palaeoclimate reconstruction	-1.97772	#NUM!	1.34733	4.3			0.166667	57	38	6	0.0877193
Peru-1	-3.82	-73.32	94	1	4	0	0	0	0	0	0	0	0	0	0	0	0	Occurrence and abundance of 136-methyl branched glycerol dialkyl glycerol tetraethers in soils: Implications for palaeoclimate reconstruction	-1.37107	#DIV/0!	1.97313	4.5			#DIV/0!	99	0	0	0.0909091
Peru-10	-12.68	-69.13	93	1	1	3	1	0	0	0	0	0	0	0	0	0	0	Occurrence and abundance of 137-methyl branched glycerol dialkyl glycerol tetraethers in soils: Implications for palaeoclimate reconstruction	-1.68124	0.477121	1.98227	4.4			0	95	4	0	0.0315789
Peru-13	-3.92	-73.37	92	3	5	0	0	0	0	0	0	0	0	0	0	0	0	Occurrence and abundance of 138-methyl branched glycerol dialkyl glycerol tetraethers in soils: Implications for palaeoclimate reconstruction	-1.26482	#DIV/0!	1.48667				#DIV/0!	100	0	0	0.13
Peru-14	-3.92	-73.37	94	3	2	1	0	0	0	0	0	0	0	0	0	0	0	Occurrence and abundance of 139-methyl branched glycerol dialkyl glycerol tetraethers in soils: Implications for palaeoclimate reconstruction	-1.67669	#NUM!	1.5006				0	99	1	0	0.0707071
Peru-4	-3.85	-73.27	91	2	2	4	0	0	0	0	0	0	0	0	0	0	0	Occurrence and abundance of 140-methyl branched glycerol dialkyl glycerol tetraethers in soils: Implications for palaeoclimate reconstruction	-1.67669	#NUM!	1.67669	4			0	95	4	0	0.0631579
Rarotonga	-21.2	-159.82	93	2	1	3	1	0	0	0	0	0	0	0	0	0	0	Occurrence and abundance of 141-methyl branched glycerol dialkyl glycerol tetraethers in soils: Implications for palaeoclimate reconstruction	-1.68124	0.477121	1.68124	5.4			0	96	4	0	0.0416667
Scotland-D	54.92	-3.33	44	4	1	39	2	1	0	0	0	7	1	0	0	0	0	Occurrence and abundance of 142-methyl branched glycerol dialkyl glycerol tetraethers in soils: Implications for palaeoclimate reconstruction	-1.35218	1.18564	1.22011	5.4			0.195122	49	42	8	0.122449
Seychelles	-4.67	55.31	97	1	1	1	0	0	0	0	0	0	0	0	0	0	0	Occurrence and abundance of 143-methyl branched glycerol dialkyl glycerol tetraethers in soils: Implications for palaeoclimate reconstruction	-1.99123	#NUM!	1.99123	5.2			0	99	1	0	0.030303
South Africa-12	-29.52	30.27	82	2	1	12	3	0	0	0	0	1	0	0	0	0	0	Occurrence and abundance of 144-methyl branched glycerol dialkyl glycerol tetraethers in soils: Implications for palaeoclimate reconstruction	-1.37566	0.636822	1.6721	5.5			0.0666667	85	15	1	0.0470588
SouthAfrica-16	-29.67	30.38	79	4	1	7	7	1	0	0	0	1	1	0	0	0	0	Occurrence and abundance of 145-methyl branched glycerol dialkyl glycerol tetraethers in soils: Implications for palaeoclimate reconstruction	-0.985277	0	1.23553	6			0.142857	84	15	2	0.0714286
SouthAfrica3	-29.5	30.92	84	3	2	9	1	0	0	0	0	0	0	0	0	0	0	Occurrence and abundance of 146-methyl branched glycerol dialkyl glycerol tetraethers in soils: Implications for palaeoclimate reconstruction	-1.49136	0.954243	1.49136	4.4			0	89	10	0	0.0786517
SouthAfrica-7	-29.78	30.68	90	0	0	8	2	0	0	0	0	0	0	0	0	0	0	Occurrence and abundance of 147-methyl branched glycerol dialkyl glycerol tetraethers in soils: Implications for palaeoclimate reconstruction	-1.6902	0.60206	#NUM!	5.5			0	90	10	0	0
Spain-6	38.9	-6.27	38	4	0	23	21	1	1	0	0	7	5	0	0	0	0	Occurrence and abundance of 148-methyl branched glycerol dialkyl glycerol tetraethers in soils: Implications for palaeoclimate reconstruction	-0.401145	0.0621479	1.08636	6.6			0.272727	42	46	12	0.0952381
Spain-7	38.98	-6.33	38	0	0	34	17	0	0	0	0	6	2	2	0	0	0	Occurrence and abundance of 149-methyl branched glycerol dialkyl glycerol tetraethers in soils: Implications for palaeoclimate reconstruction	-0.613341	0.323306	#NUM!	5.5			0.156863	38	51	10	0
Svalbard-LB1	78.22	15.6	17	3	0	25	23	2	3	1	0	13	11	2	0	0	0	Occurrence and abundance of 150-methyl branched glycerol dialkyl glycerol tetraethers in soils: Implications for palaeoclimate reconstruction	-0.172161	0.0483047	0.924279	4.35			0.5	20	54	26	0.15
Svalbard-MP1	79.18	11.17	26	2	0	22	25	1	2	0	0	9	11	0	0	0	0	Occurrence and abundance of 151-methyl branched glycerol dialkyl glycerol tetraethers in soils: Implications for palaeoclimate reconstruction	-0.176091	-0.0649408	1.20412	7.11			0.425532	28	50	20	0.0714286
Svalbard-MP2	79.18	11.2	10	4	0	11	24	4	8	0	0	10	27	1	1	0	0	Occurrence and abundance of 152-methyl branched glycerol dialkyl glycerol tetraethers in soils: Implications for palaeoclimate reconstruction	0.28679	-0.385351	0.419129	8.29			1.05714	14	47	39	0.285714
Svalbard-MP3	79.2	11.27	28	2	0	31	21	1	1	1	0	11	5	0	0	0	0	Occurrence and abundance of 153-methyl branched glycerol dialkyl glycerol tetraethers in soils: Implications for palaeoclimate reconstruction	-0.413734	0.208276	1.29373	5.5			0.307692	30	55	16	0.0666667
Svalbard-MP4	79.2	11.3	9	4	1	10	27	3	13	0	1	7	23	1	2	0	0	Occurrence and abundance of 154-methyl branched glycerol dialkyl glycerol tetraethers in soils: Implications for palaeoclimate reconstruction	0.411101	-0.468521	0.433656	8.34			0.810811	14	54	33	0.428571
Svalbard-MP5	79.2	11.32	10	4	1	10	23	4	11	0	1	7	25	2	1	0	0	Occurrence and abundance of 155-methyl branched glycerol dialkyl glycerol tetraethers in soils: Implications for palaeoclimate reconstruction	0.361028	-0.450792	0.39794	8.25			0.969697	15	49	35	0.4
Svalbard-MP6	79.2	11.32	8	3	1	12	15	4	6	0	1	19	26	1	2	0	0	Occurrence and abundance of 156-methyl branched glycerol dialkyl glycerol tetraethers in soils: Implications for palaeoclimate reconstruction	0.116506	-0.121422	0.455932	9.34			1.66667	12	38	48	0.416667
Svalbard-NA1	78.92	11.93	9	2	0	13	21	4	3	0	0	16	31	1	1	0	0	Occurrence and abundance of 157-methyl branched glycerol dialkyl glycerol tetraethers in soils: Implications for palaeoclimate reconstruction	0.168404	-0.253605	0.564271	7.42			1.38235	11	41	49	0.181818
Svalbard-NA2	78.93	11.92	26	1	0	27	26	1	1	0	0	12	6	0	0	0	0	Occurrence and abundance of 158-methyl branched glycerol dialkyl glycerol tetraethers in soils: Implications for palaeoclimate reconstruction	-0.294399	0.0859146	1.42325	6.32			0.339623	27	55	18	0.037037
Sweden-15	64.18	19.57	54	1	1	36	2	1	0	1	0	4	0	0	0	0	0	Occurrence and abundance of 159-methyl branched glycerol dialkyl glycerol tetraethers in soils: Implications for palaeoclimate reconstruction	-1.49601	1.30103	1.65321	4.5			0.105263	56	40	4	0.0535714
Sweden-17	64.2	19.48	65	2	0	27	3	0	0	0	0	3	0	0	0	0	0	Occurrence and abundance of 160-methyl branched glycerol dialkyl glycerol tetraethers in soils: Implications for palaeoclimate reconstruction	-1.5006	1	1.66276	4.5			0.1	67	30	3	0.0298507
Sweden-4	55.82	14.07	16	8	1	9	25	7	11	0	1	6	14	0	1	0	0	Occurrence and abundance of 161-methyl branched glycerol dialkyl glycerol tetraethers in soils: Implications for palaeoclimate reconstruction	0.232914	-0.414973	0.221849	7.7			0.588235	25	53	21	0.4
Sweden-B	59.63	18.43	25	12	5	22	12	9	5	1	0	6	4	0	0	0	0	Occurrence and abundance of 162-methyl branched glycerol dialkyl glycerol tetraethers in soils: Implications for palaeoclimate reconstruction	-0.309303	0.243038	0.349879	4			0.294118	42	49	10	0.52381
Netherlands-A	53.08	4.75	20	11	1	13	23	5	9	0	1	5	11	0	1	0	0	Occurrence and abundance of 163-methyl branched glycerol dialkyl glycerol tetraethers in soils: Implications for palaeoclimate reconstruction	0.0829742	-0.276206	0.314394	6.7			0.444444	32	51	17	0.40625
Netherlands-F	53.08	4.75	23	9	1	21	20	4	6	0	0	7	7	0	1	0	0	Occurrence and abundance of 164-methyl branched glycerol dialkyl glycerol tetraethers in soils: Implications for palaeoclimate reconstruction	-0.163502	0.0157943	0.529509	6.7			0.341463	33	51	15	0.333333
Netherlands-J	53.08	4.75	20	10	1	13	24	5	8	0	1	5	11	0	1	0	0	Occurrence and abundance of 165-methyl branched glycerol dialkyl glycerol tetraethers in soils: Implications for palaeoclimate reconstruction	0.0829742	-0.288796	0.342423	6.4			0.432432	31	51	17	0.387097
Netherlands-M	53.08	4.75	15	9	1	9	24	6	11	0	1	5	17	0	2	0	0	Occurrence and abundance of 166-methyl branched glycerol dialkyl glycerol tetraethers in soils: Implications for palaeoclimate reconstruction	0.28579	-0.466656	0.20412	6.9			0.666667	25	51	24	0.44
Turkey-12	39.92	29.93	19	8	1	3	30	4	5	0	0	4	25	1	1	0	0	Occurrence and abundance of 167-methyl branched glycerol dialkyl glycerol tetraethers in soils: Implications for palaeoclimate reconstruction	0.377418	-0.895265	0.263241	8			0.878788	28	42	31	0.357143
Turkey-8	37.73	33.57	20	2	1	2	23	0	0	0	0	1	51	1	0	0	0	Occurrence and abundance of 168-methyl branched glycerol dialkyl glycerol tetraethers in soils: Implications for palaeoclimate reconstruction	0.513333	-1.39211	1.04139	8			2.08	23	25	53	0.173913
Uganda-1	0.35	29.97	69	1	1	26	0	1	0	0	0	2	0	0	0	0	0	Occurrence and abundance of 169-methyl branched glycerol dialkyl glycerol tetraethers in soils: Implications for palaeoclimate reconstruction	-1.98677	#NUM!	1.67669	3.6			0.0769231	71	27	2	0.0422535
Uganda-2	0.38	29.88	16	0	0	38	3	0	0	0	0	41	2	0	0	0	0	Occurrence and abundance of 170-methyl branched glycerol dialkyl glycerol tetraethers in soils: Implications for palaeoclimate reconstruction	-1.27875	1.19866	#NUM!	5.1			1.04878	16	41	43	0
Uganda-3	0.83	30.05	34	27	6	4	13	3	10	0	1	1	2	0	1	0	0	Occurrence and abundance of 171-methyl branched glycerol dialkyl glycerol tetraethers in soils: Implications for palaeoclimate reconstruction	-0.0725507	-0.477121	0.102662	7.1			0.176471	67	31	4	0.58209
Uruguay-7	-32.67	-57.83	80	3	1	9	5	0	0	0	0	2	1	0	0	0	0	Occurrence and abundance of 172-methyl branched glycerol dialkyl glycerol tetraethers in soils: Implications for palaeoclimate reconstruction	-1.11394	0.263241	1.47227	5.6			0.214286	84	14	3	0.0595238
Uruguay-8	-32	-57.5	81	2	1	11	4	0	0	0	0	1	0	0	0	0	0	Occurrence and abundance of 173-methyl branched glycerol dialkyl glycerol tetraethers in soils: Implications for palaeoclimate reconstruction	-1.26951	0.477121	1.66276	5.3			0.0666667	84	15	1	0.047619
USA-10	22.67	-159.4	86	5	2	5	1	0	0	0	0	0	0	0	0	0	0	Occurrence and abundance of 174-methyl branched glycerol dialkyl glycerol tetraethers in soils: Implications for palaeoclimate reconstruction	-1.48192	0.69897	1.26007	5.1			0	93	6	0	0.0967742
USA-13	40.47	-99.47	58	7	0	17	12	1	1	0	0	2	2	0	0	0	0	Occurrence and abundance of 175-methyl branched glycerol dialkyl glycerol tetraethers in soils: Implications for palaeoclimate reconstruction	-0.710399	0.132626	0.971971	5.9			0.137931	65	31	4	0.107692
USA-17	64.87	-147.83	19	5	1	23	17	3	6	1	0	13	9	1	1	0	0	Occurrence and abundance of 176-methyl branched glycerol dialkyl glycerol tetraethers in soils: Implications for palaeoclimate reconstruction	-0.208884	0.141329	0.720159	7.1			0.55	25	50	24	0.28
USA-BB1	44.9	-68.1	62	2	0	29	1	1	0	0	0	4	0	0	0	0	0	Occurrence and abundance of 177-methyl branched glycerol dialkyl glycerol tetraethers in soils: Implications for palaeoclimate reconstruction	-1.97772	1.51851	1.48192	4.25			0.133333	64	31	4	0.03125
USA-BB2	44.9	-68.1	54	5	1	31	2	1	0	0	0	5	1	0	0	0	0	Occurrence and abundance of 178-methyl branched glycerol dialkyl glycerol tetraethers in soils: Implications for palaeoclimate reconstruction	-1.35218	1.07918	1.15127	4.6			0.181818	60	34	6	0.116667
USA-BF1	41.6	-80.1	61	3	1	30	1	1	0	0	0	4	0	0	0	0	0	Occurrence and abundance of 179-methyl branched glycerol dialkyl glycerol tetraethers in soils: Implications for palaeoclimate reconstruction	-1.67669	1.53148	1.35698	4.05			0.129032	65	32	4	0.0769231
USA-BP1	43.8	-102.4	17	7	1	14	27	4	7	0	0	7	14	0	1	0	0	Occurrence and abundance of 180-methyl branched glycerol dialkyl glycerol tetraethers in soils: Implications for palaeoclimate reconstruction	0.119186	-0.290565	0.449969	7.53			0.512195	25	52	22	0.36
USA-BZ2	64.8	-148.3	32	1	0	39	11	1	0	0	0	15	1	0	0	0	0	Occurrence and abundance of 181-methyl branched glycerol dialkyl glycerol tetraethers in soils: Implications for palaeoclimate reconstruction	-0.855317	0.653213	1.55023	5.16			0.32	33	51	16	0.030303
USA-BZ3	64.8	-148.3	39	1	0	43	1	1	0	0	0	14	0	0	0	0	0	Occurrence and abundance of 182-methyl branched glycerol dialkyl glycerol tetraethers in soils: Implications for palaeoclimate reconstruction	-1.98227	1.75587	1.61278	5.36			0.318182	40	45	14	0.025
USA-CA1	36.1	-111.8	13	4	1	17	32	2	5	0	0	10	15	0	0	0	0	Occurrence and abundance of 183-methyl branched glycerol dialkyl glycerol tetraethers in soils: Implications for palaeoclimate reconstruction	0.122216	-0.240734	0.69897	7.27			0.510204	18	56	25	0.333333
USA-CA2	36.1	-111.7	12	3	1	14	35	2	4	0	0	10	19	0	1	0	0	Occurrence and abundance of 184-methyl branched glycerol dialkyl glycerol tetraethers in soils: Implications for palaeoclimate reconstruction	0.221849	-0.352183	0.716003	8.02			0.591837	16	55	30	0.3125
USA-CC1	45.4	-93.2	58	7	1	19	9	1	1	0	0	3	1	0	0	0	0	Occurrence and abundance of 185-methyl branched glycerol dialkyl glycerol tetraethers in soils: Implications for palaeoclimate reconstruction	-0.823909	0.342423	0.983401	6.06			0.142857	66	30	4	0.136364
USA-CF1	42.2	-74.3	56	5	1	30	2	1	0	1	0	5	0	0	0	0	0	Occurrence and abundance of 186-methyl branched glycerol dialkyl glycerol tetraethers in soils: Implications for palaeoclimate reconstruction	-1.48192	1.24304	1.15635	3.92			0.15625	62	34	5	0.112903
USA-CF2	41.9	-74.4	67	2	1	26	1	1	0	0	0	2	0	0	0	0	0	Occurrence and abundance of 187-methyl branched glycerol dialkyl glycerol tetraethers in soils: Implications for palaeoclimate reconstruction	-1.67669	1.44716	1.49136	3.63			0.0740741	70	28	2	0.0571429
USA-CF3	42.1	-74.1	76	2	1	18	0	1	0	0	0	1	0	0	0	0	0	Occurrence and abundance of 188-methyl branched glycerol dialkyl glycerol tetraethers in soils: Implications for palaeoclimate reconstruction	-1.97772	#NUM!	1.49601	3.56			0.0555556	79	19	1	0.0506329
USA-CL1	34.6	-87.7	66	6	1	15	6	1	2	0	0	1	2	0	0	0	0	Occurrence and abundance of 189-methyl branched glycerol dialkyl glycerol tetraethers in soils: Implications for palaeoclimate reconstruction	-0.872421	0.30103	1.06339	5.68			0.142857	73	24	3	0.109589
USA-CL2	34.6	-87.7	70	6	1	14	6	1	1	0	0	2	1	0	0	0	0	Occurrence and abundance of 190-methyl branched glycerol dialkyl glycerol tetraethers in soils: Implications for palaeoclimate reconstruction	-0.980256	0.359022	1.07918	5.57			0.15	77	22	3	0.103896
USA-CL3	34.6	-87.7	76	3	1	16	2	0	0	0	0	2	1	0	0	0	0	Occurrence and abundance of 191-methyl branched glycerol dialkyl glycerol tetraethers in soils: Implications for palaeoclimate reconstruction	-1.37107	0.778151	1.48667	4.89			0.166667	80	18	3	0.0625
USA-CM1	33.3	-96.2	19	24	5	9	15	8	9	0	1	4	6	1	1	0	0	Occurrence and abundance of 192-methyl branched glycerol dialkyl glycerol tetraethers in soils: Implications for palaeoclimate reconstruction	0.0630517	-0.208276	-0.0579919	7.85			0.416667	48	42	12	0.708333
USA-CO1	40.4	-105.7	23	2	1	32	18	1	1	0	0	15	6	0	0	0	0	Occurrence and abundance of 193-methyl branched glycerol dialkyl glycerol tetraethers in soils: Implications for palaeoclimate reconstruction	-0.430125	0.291887	1.26324	6.13			0.42	26	52	21	0.153846
USA-CO2	40.6	-105.3	31	2	0	33	16	0	0	0	0	13	4	0	0	0	0	Occurrence and abundance of 194-methyl branched glycerol dialkyl glycerol tetraethers in soils: Implications for palaeoclimate reconstruction	-0.585461	0.361728	1.50515	5.68			0.346939	33	49	17	0.0606061
USA-CO3	40.8	-104.8	37	4	0	29	18	1	2	0	0	6	4	0	0	0	0	Occurrence and abundance of 195-methyl branched glycerol dialkyl glycerol tetraethers in soils: Implications for palaeoclimate reconstruction	-0.477121	0.201645	1.12057	6.02			0.212766	41	50	10	0.097561
USA-DF1	36	-78.1	70	2	1	20	2	0	0	0	0	3	0	0	0	0	0	Occurrence and abundance of 196-methyl branched glycerol dialkyl glycerol tetraethers in soils: Implications for palaeoclimate reconstruction	-1.49136	1.0607	1.65321	5.37			0.136364	73	22	3	0.0547945
USA-DF3	36	-78.1	73	2	1	20	1	0	0	0	0	2	1	0	0	1	0	Occurrence and abundance of 197-methyl branched glycerol dialkyl glycerol tetraethers in soils: Implications for palaeoclimate reconstruction	-1.5006	1.04139	1.66745	5.05			0.142857	76	21	4	0.0526316
USA-GB2	39.3	-111.5	7	3	2	3	27	5	9	0	0	7	33	1	2	0	0	Occurrence and abundance of 198-methyl branched glycerol dialkyl glycerol tetraethers in soils: Implications for palaeoclimate reconstruction	0.632874	-0.778151	0.09691	7.57			1.33333	12	44	43	0.583333
USA-GB3	39.3	-111.5	16	4	0	9	35	2	7	0	0	6	18	0	1	0	0	Occurrence and abundance of 199-methyl branched glycerol dialkyl glycerol tetraethers in soils: Implications for palaeoclimate reconstruction	0.293968	-0.548185	0.619789	7.18			0.545455	20	53	25	0.2
USA-GB4	39.3	-111.5	17	3	1	20	28	2	3	1	0	13	12	0	0	0	0	Occurrence and abundance of 200-methyl branched glycerol dialkyl glycerol tetraethers in soils: Implications for palaeoclimate reconstruction	-0.0555173	-0.0835461	0.869232	6.85			0.520833	21	54	25	0.238095
USA-GB5	39.3	-111.5	7	2	1	5	27	1	3	0	0	5	46	2	1	0	0	Occurrence and abundance of 201-methyl branched glycerol dialkyl glycerol tetraethers in soils: Implications for palaeoclimate reconstruction	0.661646	-0.863323	0.60206	8.22			1.59375	10	36	54	0.4
USA-GB6	39.3	-111.5	12	4	1	9	33	3	7	1	0	7	23	1	1	0	0	Occurrence and abundance of 202-methyl branched glycerol dialkyl glycerol tetraethers in soils: Implications for palaeoclimate reconstruction	0.365755	-0.544068	0.477121	7.23			0.714286	17	53	32	0.352941
USA-HF2	42.5	-72.2	67	1	0	28	1	0	0	0	0	2	0	0	0	1	0	Occurrence and abundance of 203-methyl branched glycerol dialkyl glycerol tetraethers in soils: Implications for palaeoclimate reconstruction	-1.98677	1.47712	1.97772	3.98			0.0689655	68	29	3	0.0147059
USA-HI3	20.1	-155.7	37	19	2	15	12	5	5	0	0	2	2	0	1	0	0	Occurrence and abundance of 204-methyl branched glycerol dialkyl glycerol tetraethers in soils: Implications for palaeoclimate reconstruction	-0.389971	0.0843209	0.335792	6.53			0.148148	58	37	5	0.396552
USA-HJ1	44.2	-122.2	41	2	0	28	13	0	0	0	0	11	3	0	0	0	0	Occurrence and abundance of 205-methyl branched glycerol dialkyl glycerol tetraethers in soils: Implications for palaeoclimate reconstruction	-0.69897	0.386945	1.53782	5.41			0.341463	43	41	14	0.0465116
USA-IE2	41.8	-73.47	52	6	2	28	6	2	0	0	0	4	1	0	0	0	0	Occurrence and abundance of 206-methyl branched glycerol dialkyl glycerol tetraethers in soils: Implications for palaeoclimate reconstruction	-0.970037	0.660052	1	5.52			0.147059	60	36	5	0.166667
USA-IE3	41.8	-73.47	37	9	2	25	14	3	3	0	0	5	3	0	0	0	0	Occurrence and abundance of 207-methyl branched glycerol dialkyl glycerol tetraethers in soils: Implications for palaeoclimate reconstruction	-0.483652	0.246672	0.71321	5.72			0.205128	48	45	8	0.270833
USA-IE4	41.8	-73.47	27	19	3	14	16	8	6	1	0	3	4	0	1	0	0	Occurrence and abundance of 208-methyl branched glycerol dialkyl glycerol tetraethers in soils: Implications for palaeoclimate reconstruction	-0.166331	-0.0705811	0.18142	6.29			0.233333	49	45	8	0.510204
USA-IE5	41.8	-73.47	50	7	2	27	6	2	1	0	0	4	1	0	0	0	0	Occurrence and abundance of 209-methyl branched glycerol dialkyl glycerol tetraethers in soils: Implications for palaeoclimate reconstruction	-0.908485	0.646264	0.932248	5.57			0.151515	59	36	5	0.186441
USA-IT1	47.2	-95.2	40	6	1	33	9	2	2	0	0	6	2	0	0	0	0	Occurrence and abundance of 210-methyl branched glycerol dialkyl glycerol tetraethers in soils: Implications for palaeoclimate reconstruction	-0.751499	0.549672	0.960233	5.78			0.190476	47	46	8	0.170213
USA-IT2	47.2	-95.2	44	4	0	38	4	1	1	0	0	7	1	0	0	0	0	Occurrence and abundance of 211-methyl branched glycerol dialkyl glycerol tetraethers in soils: Implications for palaeoclimate reconstruction	-1.17124	0.954243	1.21484	5.42			0.190476	48	44	8	0.0833333
USA-KP1	39.1	-96.6	42	14	3	17	13	4	2	0	0	3	2	0	0	0	0	Occurrence and abundance of 212-methyl branched glycerol dialkyl glycerol tetraethers in soils: Implications for palaeoclimate reconstruction	-0.491362	0.124939	0.51558	6.37			0.166667	59	36	5	0.338983
USA-KP2	39.1	-96.6	52	11	2	15	12	2	1	0	0	2	2	0	0	0	0	Occurrence and abundance of 213-methyl branched glycerol dialkyl glycerol tetraethers in soils: Implications for palaeoclimate reconstruction	-0.6084	0.0843209	0.712131	6.5			0.148148	65	30	4	0.230769
USA-LQ2	18.3	-65.8	90	1	3	5	1	0	0	0	0	0	0	0	0	0	0	Occurrence and abundance of 214-methyl branched glycerol dialkyl glycerol tetraethers in soils: Implications for palaeoclimate reconstruction	-1.37566	0.69897	1.97772	5.03			0	94	6	0	0.0744681
USA-MD3	35.2	-115.9	27	3	0	5	44	0	0	0	0	2	20	0	0	0	0	Occurrence and abundance of 215-methyl branched glycerol dialkyl glycerol tetraethers in soils: Implications for palaeoclimate reconstruction	0.274701	-0.961082	1.02803	7.9			0.44898	30	49	22	0.1
USA-MD4	35.2	-115.9	22	1	0	0	47	0	0	0	0	0	30	0	0	0	0	Occurrence and abundance of 216-methyl branched glycerol dialkyl glycerol tetraethers in soils: Implications for palaeoclimate reconstruction	0.544068	#DIV/0!	1.34242	8.86			0.638298	23	47	30	0.0434783
USA-MP1	49.5	-123.5	34	1	0	41	2	1	0	0	0	19	1	0	0	0	0	Occurrence and abundance of 217-methyl branched glycerol dialkyl glycerol tetraethers in soils: Implications for palaeoclimate reconstruction	-1.49601	1.30103	1.57403	4.56			0.465116	35	44	20	0.0285714
USA-MP2	49.5	-123.5	34	1	0	42	2	1	0	0	0	20	0	0	0	0	0	Occurrence and abundance of 218-methyl branched glycerol dialkyl glycerol tetraethers in soils: Implications for palaeoclimate reconstruction	-1.68124	1.49136	1.57978	4.38			0.454545	35	45	20	0.0285714
USA-R-1	42.75	-73.8	19	17	2	7	18	2	14	1	1	12	5	0	1	0	0	Occurrence and abundance of 219-methyl branched glycerol dialkyl glycerol tetraethers in soils: Implications for palaeoclimate reconstruction	0.0330003	-0.0829742	0.13622	6.6			0.68	38	43	18	0.552632
USA-R-2	41.58	-84.6	24	17	2	25	9	10	4	1	0	5	3	0	0	0	0	Occurrence and abundance of 220-methyl branched glycerol dialkyl glycerol tetraethers in soils: Implications for palaeoclimate reconstruction	-0.477121	0.39794	0.258832	6.5			0.235294	43	49	8	0.488372
USA-R-3	43.31	-89.25	21	17	3	13	15	10	9	0	1	4	6	0	1	0	0	Occurrence and abundance of 221-methyl branched glycerol dialkyl glycerol tetraethers in soils: Implications for palaeoclimate reconstruction	-0.0357156	-0.0917704	0.100115	7.7			0.357143	41	48	11	0.560976
USA-R-4	44.53	-93.13	18	12	2	18	16	9	8	1	1	7	9	1	1	0	0	Occurrence and abundance of 222-methyl branched glycerol dialkyl glycerol tetraethers in soils: Implications for palaeoclimate reconstruction	-0.0652667	0	0.234083	7.7			0.470588	32	53	18	0.5
USA-R-5	45.57	-112.29	16	4	2	4	29	5	5	0	1	7	26	1	1	0	0	Occurrence and abundance of 223-methyl branched glycerol dialkyl glycerol tetraethers in soils: Implications for palaeoclimate reconstruction	0.374816	-0.69897	0.346787	8.1			1	22	44	35	0.363636
USA-R-6	47.38	-117.32	22	4	1	16	25	3	3	0	0	13	14	0	0	0	0	Occurrence and abundance of 224-methyl branched glycerol dialkyl glycerol tetraethers in soils: Implications for palaeoclimate reconstruction	-0.0741017	-0.128667	0.734686	7.4			0.658537	27	47	27	0.222222
USA-RT1	31.5	-96.9	18	25	5	6	16	3	17	0	1	3	5	1	1	0	0	Occurrence and abundance of 225-methyl branched glycerol dialkyl glycerol tetraethers in soils: Implications for palaeoclimate reconstruction	0.221849	-0.367977	-0.0669468	7.92			0.363636	48	43	10	0.729167
USA-RT2	31.5	-96.9	19	24	5	6	17	2	17	0	1	3	5	0	1	0	0	Occurrence and abundance of 226-methyl branched glycerol dialkyl glycerol tetraethers in soils: Implications for palaeoclimate reconstruction	0.2156	-0.38818	-0.0170333	8.07			0.347826	48	43	9	0.708333
USA-SA1	35.4	-111.6	23	2	0	24	24	1	2	0	0	17	8	0	0	0	0	Occurrence and abundance of 227-methyl branched glycerol dialkyl glycerol tetraethers in soils: Implications for palaeoclimate reconstruction	-0.274701	0.107634	1.19498	6.9			0.520833	25	51	25	0.08
USA-SB1	34.5	-119.8	12	1	0	0	54	0	3	0	0	1	30	0	0	0	0	Occurrence and abundance of 228-methyl branched glycerol dialkyl glycerol tetraethers in soils: Implications for palaeoclimate reconstruction	0.825576	-1.92428	1.07918	7.92			0.574074	13	57	31	0.0769231
USA-SN1	36.5	-118.2	18	4	0	38	11	0	0	0	0	23	5	0	0	0	0	Occurrence and abundance of 229-methyl branched glycerol dialkyl glycerol tetraethers in soils: Implications for palaeoclimate reconstruction	-0.693507	0.58121	1.14613	4.95			0.571429	22	49	28	0.181818
USA-SN3	36.5	-118.2	22	1	1	38	13	1	0	0	0	19	4	0	0	0	0	Occurrence and abundance of 230-methyl branched glycerol dialkyl glycerol tetraethers in soils: Implications for palaeoclimate reconstruction	-0.642355	0.525426	1.47712	5.74			0.45098	24	52	23	0.125
USA-SP1	36.5	-118.7	32	3	0	25	22	2	2	0	0	10	5	0	0	0	0	Occurrence and abundance of 231-methyl branched glycerol dialkyl glycerol tetraethers in soils: Implications for palaeoclimate reconstruction	-0.363677	0.112704	1.0569	6.25			0.319149	35	51	15	0.0857143
USA-SP2	36.6	-111.6	35	2	1	42	5	1	0	0	0	14	1	0	0	0	0	Occurrence and abundance of 232-methyl branched glycerol dialkyl glycerol tetraethers in soils: Implications for palaeoclimate reconstruction	-1.11394	0.970037	1.40937	5.13			0.319149	38	48	15	0.105263
USA-SR1	34.7	-120.1	20	2	0	24	27	1	3	0	0	12	11	0	0	0	0	Occurrence and abundance of 233-methyl branched glycerol dialkyl glycerol tetraethers in soils: Implications for palaeoclimate reconstruction	-0.135404	-0.0234811	1.16633	6.84			0.45098	22	55	23	0.0909091
USA-SR2	34.7	-120.1	10	3	0	5	34	2	4	0	0	11	31	1	1	0	0	Occurrence and abundance of 234-methyl branched glycerol dialkyl glycerol tetraethers in soils: Implications for palaeoclimate reconstruction	0.430125	-0.608793	0.477121	8			1.07692	13	45	44	0.230769
USA-SR3	34.7	-120.1	14	2	0	23	29	1	2	0	0	15	15	0	0	0	0	Occurrence and abundance of 235-methyl branched glycerol dialkyl glycerol tetraethers in soils: Implications for palaeoclimate reconstruction	-0.0532455	-0.0636691	1.09108	6.95			0.576923	16	55	30	0.125
USA-SV1	34.3	-106.7	11	1	0	0	54	0	2	0	0	2	30	0	0	0	0	Occurrence and abundance of 236-methyl branched glycerol dialkyl glycerol tetraethers in soils: Implications for palaeoclimate reconstruction	0.820555	-1.62325	1.04139	8.31			0.592593	12	56	32	0.0833333
USA-SV2	34.3	-106.7	15	2	1	2	51	0	3	0	0	2	24	0	0	0	0	Occurrence and abundance of 237-methyl branched glycerol dialkyl glycerol tetraethers in soils: Implications for palaeoclimate reconstruction	0.618873	-1.273	0.929419	8.44			0.490566	18	56	26	0.222222
USA-SV3	34.3	-106.7	14	5	0	12	28	5	5	0	0	9	23	0	0	0	0	Occurrence and abundance of 238-methyl branched glycerol dialkyl glycerol tetraethers in soils: Implications for palaeoclimate reconstruction	0.20412	-0.385351	0.414973	8.31			0.8	19	50	32	0.263158
USA-SV4	34.3	-106.7	23	2	0	5	44	0	2	0	0	2	22	0	0	0	0	Occurrence and abundance of 239-methyl branched glycerol dialkyl glycerol tetraethers in soils: Implications for palaeoclimate reconstruction	0.355388	-0.974446	1.14613	8.29			0.489796	25	51	24	0.08
USA-VC1	35.9	-106.6	35	2	0	34	14	1	1	0	0	8	4	0	0	0	0	Occurrence and abundance of 240-methyl branched glycerol dialkyl glycerol tetraethers in soils: Implications for palaeoclimate reconstruction	-0.607737	0.367977	1.36173	5.55			0.25	37	50	12	0.0540541
USA-VC2	35.9	-106.6	32	5	1	31	16	3	1	1	0	7	3	0	0	0	0	Occurrence and abundance of 241-methyl branched glycerol dialkyl glycerol tetraethers in soils: Implications for palaeoclimate reconstruction	-0.522879	0.30103	0.896251	5.99			0.212766	38	52	10	0.184211
USA-W	41.54	-70.65	74	1	1	21	1	1	0	0	0	1	0	0	0	0	0	Occurrence and abundance of 242-methyl branched glycerol dialkyl glycerol tetraethers in soils: Implications for palaeoclimate reconstruction	-1.68124	1.34242	1.67669	4.5			0.0454545	76	23	1	0.0394737
Zaire-1	0.87	42.47	89	2	1	7	1	0	0	0	0	1	0	0	0	0	0	Occurrence and abundance of 243-methyl branched glycerol dialkyl glycerol tetraethers in soils: Implications for palaeoclimate reconstruction	-1.68574	0.90309	1.68124	3.9			0.125	92	8	1	0.0434783
Zaire-2	0.77	24.43	95	2	1	2	0	0	0	0	0	0	0	0	0	0	0	Occurrence and abundance of 244-methyl branched glycerol dialkyl glycerol tetraethers in soils: Implications for palaeoclimate reconstruction	-1.98677	#NUM!	1.68574	4.1			0	98	2	0	0.0408163
P756	35.35	100.93	6	3	1	5	34	5	9	1	0	6	27	2	1	1	0	Distribution of branched glycerol dialkyl glycerol tetraethers in surface soils of the Qinghai- Tibetan Plateau: implications of brGDGTs-based proxies in cold and dry regions.	0.626884	-0.743937	0.138303	7.75			0.846154	10	54	37	0.5
P760	34.54	100.22	10	5	0	16	30	0	18	0	0	6	15	0	0	0	0	Distribution of branched glycerol dialkyl glycerol tetraethers in surface soils of the Qinghai- Tibetan Plateau: implications of brGDGTs-based proxies in cold and dry regions.	0.294191	-0.31079	0.716003	7.5			0.456522	15	64	21	0.333333
P765	33.03	96.92	11	6	1	6	32	4	13	0	0	6	18	2	1	0	0	Distribution of branched glycerol dialkyl glycerol tetraethers in surface soils of the Qinghai- Tibetan Plateau: implications of brGDGTs-based proxies in cold and dry regions.	0.451186	-0.619789	0.230449	7.63			0.631579	18	55	27	0.444444
P773	33.95	95.7	8	0	0	16	29	3	13	0	0	7	23	0	0	0	0	Distribution of branched glycerol dialkyl glycerol tetraethers in surface soils of the Qinghai- Tibetan Plateau: implications of brGDGTs-based proxies in cold and dry regions.	0.321552	-0.354276	0.90309	7.14			0.666667	8	61	30	0
P775	34.1	96.2	11	6	1	10	29	4	9	0	0	8	22	0	0	0	0	Distribution of branched glycerol dialkyl glycerol tetraethers in surface soils of the Qinghai- Tibetan Plateau: implications of brGDGTs-based proxies in cold and dry regions.	0.322932	-0.452298	0.322219	7.18			0.769231	18	52	30	0.444444
P782	36.86	101.02	5	3	1	4	38	7	7	0	0	5	28	1	1	0	0	Distribution of branched glycerol dialkyl glycerol tetraethers in surface soils of the Qinghai- Tibetan Plateau: implications of brGDGTs-based proxies in cold and dry regions.	0.728933	-0.865301	-0.0457575	7.81			0.785714	9	56	35	0.555556
P787	37.28	98.39	8	3	0	4	36	4	6	0	0	4	30	2	2	1	0	Distribution of branched glycerol dialkyl glycerol tetraethers in surface soils of the Qinghai- Tibetan Plateau: implications of brGDGTs-based proxies in cold and dry regions.	0.665112	-0.916454	0.234083	7.98			0.85	11	50	39	0.272727
P796	35.13	93.04	6	3	0	7	24	6	11	1	0	9	30	2	1	0	0	Distribution of branched glycerol dialkyl glycerol tetraethers in surface soils of the Qinghai- Tibetan Plateau: implications of brGDGTs-based proxies in cold and dry regions.	0.477121	-0.528274	0.159701	8.04			1.25806	9	49	42	0.333333
P801	33.73	92.1	7	1	0	6	30	6	7	0	0	8	35	0	0	0	0	Distribution of branched glycerol dialkyl glycerol tetraethers in surface soils of the Qinghai- Tibetan Plateau: implications of brGDGTs-based proxies in cold and dry regions.	0.535113	-0.666785	0.268845	7.66			1.19444	8	49	43	0.125
P802	33.32	91.88	7	1	0	11	30	12	6	0	0	8	24	0	0	0	0	Distribution of branched glycerol dialkyl glycerol tetraethers in surface soils of the Qinghai- Tibetan Plateau: implications of brGDGTs-based proxies in cold and dry regions.	0.363178	-0.45364	0.141329	7.65			0.780488	8	59	32	0.125
P804	32.19	91.68	11	2	0	13	32	0	0	0	0	13	30	0	0	0	0	Distribution of branched glycerol dialkyl glycerol tetraethers in surface soils of the Qinghai- Tibetan Plateau: implications of brGDGTs-based proxies in cold and dry regions.	0.22419	-0.377418	1.07918	7.67			0.955556	13	45	43	0.153846
P816	29.28	90.64	18	3	0	11	48	0	0	0	0	5	15	0	0	0	0	Distribution of branched glycerol dialkyl glycerol tetraethers in surface soils of the Qinghai- Tibetan Plateau: implications of brGDGTs-based proxies in cold and dry regions.	0.267862	-0.595221	0.985277	7.81			0.338983	21	59	20	0.142857
P817	29.19	90.62	28	2	0	29	24	1	2	0	0	8	4	0	0	0	0	Distribution of branched glycerol dialkyl glycerol tetraethers in surface soils of the Qinghai- Tibetan Plateau: implications of brGDGTs-based proxies in cold and dry regions.	-0.335792	0.121044	1.27875	6.52			0.226415	30	56	12	0.0666667
P818	29.2	90.62	27	2	0	30	24	2	1	0	0	9	4	0	0	0	0	Distribution of branched glycerol dialkyl glycerol tetraethers in surface soils of the Qinghai- Tibetan Plateau: implications of brGDGTs-based proxies in cold and dry regions.	-0.357146	0.143907	1.15381	6.74			0.240741	29	57	13	0.0689655
P819	29.21	90.64	27	3	0	26	26	2	3	0	0	8	5	0	0	0	0	Distribution of branched glycerol dialkyl glycerol tetraethers in surface soils of the Qinghai- Tibetan Plateau: implications of brGDGTs-based proxies in cold and dry regions.	-0.253851	0.0401172	1.02531	6.46			0.25	30	57	13	0.1
P820	29.22	90.63	23	4	0	20	30	2	3	0	0	10	7	0	1	0	0	Distribution of branched glycerol dialkyl glycerol tetraethers in surface soils of the Qinghai- Tibetan Plateau: implications of brGDGTs-based proxies in cold and dry regions.	-0.111492	-0.0910805	0.855317	6.87			0.34	27	55	18	0.148148
P821	29.23	90.63	23	5	0	20	30	2	3	0	0	9	7	0	0	0	0	Distribution of branched glycerol dialkyl glycerol tetraethers in surface soils of the Qinghai- Tibetan Plateau: implications of brGDGTs-based proxies in cold and dry regions.	-0.113943	-0.105804	0.78837	7.09			0.32	28	55	16	0.178571
P831	28.24	88.77	4	3	1	5	35	6	7	0	1	6	25	2	3	1	0	Distribution of branched glycerol dialkyl glycerol tetraethers in surface soils of the Qinghai- Tibetan Plateau: implications of brGDGTs-based proxies in cold and dry regions.	0.681241	-0.736759	0	7.86			0.775	8	54	37	0.625
P833	28.26	87.79	9	11	1	10	21	7	17	1	1	5	13	0	2	0	0	Distribution of branched glycerol dialkyl glycerol tetraethers in surface soils of the Qinghai- Tibetan Plateau: implications of brGDGTs-based proxies in cold and dry regions.	0.360151	-0.355388	0.0234811	8.37			0.580645	21	57	20	0.619048
P848	29.55	84.64	8	6	1	7	30	6	11	0	0	7	22	1	0	0	0	Distribution of branched glycerol dialkyl glycerol tetraethers in surface soils of the Qinghai- Tibetan Plateau: implications of brGDGTs-based proxies in cold and dry regions.	0.463757	-0.569875	0.09691	8.13			0.783784	15	54	30	0.533333
P851	29.44	85.67	8	2	1	8	36	5	3	0	0	9	24	2	2	1	0	Distribution of branched glycerol dialkyl glycerol tetraethers in surface soils of the Qinghai- Tibetan Plateau: implications of brGDGTs-based proxies in cold and dry regions.	0.421604	-0.547702	0.359022	7.15			0.75	11	52	38	0.363636
P858	29.9	90.13	15	2	0	22	24	3	5	1	0	12	15	0	0	0	0	Distribution of branched glycerol dialkyl glycerol tetraethers in surface soils of the Qinghai- Tibetan Plateau: implications of brGDGTs-based proxies in cold and dry regions.	-0.0467434	-0.0595857	0.869232	6.77			0.586957	17	55	27	0.117647
P859	29.89	90.12	22	2	0	29	25	2	1	1	0	12	7	0	0	0	0	Distribution of branched glycerol dialkyl glycerol tetraethers in surface soils of the Qinghai- Tibetan Plateau: implications of brGDGTs-based proxies in cold and dry regions.	-0.280827	0.107634	1.10551	6.36			0.351852	24	58	19	0.0833333
P860	29.87	90.12	24	2	0	32	21	2	1	0	0	12	6	0	1	0	0	Distribution of branched glycerol dialkyl glycerol tetraethers in surface soils of the Qinghai- Tibetan Plateau: implications of brGDGTs-based proxies in cold and dry regions.	-0.370111	0.212089	1.14613	6.22			0.339623	26	56	19	0.0769231
P861	29.84	90.06	24	2	0	28	27	0	0	0	0	13	5	0	0	0	0	Distribution of branched glycerol dialkyl glycerol tetraethers in surface soils of the Qinghai- Tibetan Plateau: implications of brGDGTs-based proxies in cold and dry regions.	-0.307763	0.107634	1.41497	6.58			0.327273	26	55	18	0.0769231
P862	29.8	90.03	25	2	0	35	19	1	1	0	0	11	4	0	0	0	0	Distribution of branched glycerol dialkyl glycerol tetraethers in surface soils of the Qinghai- Tibetan Plateau: implications of brGDGTs-based proxies in cold and dry regions.	-0.471047	0.30103	1.30103	6.27			0.277778	27	56	15	0.0740741
P863	29.71	89.96	22	4	0	20	30	3	3	0	0	11	8	0	0	0	0	Distribution of branched glycerol dialkyl glycerol tetraethers in surface soils of the Qinghai- Tibetan Plateau: implications of brGDGTs-based proxies in cold and dry regions.	-0.111492	-0.0884219	0.778151	6.76			0.38	26	56	19	0.153846
SNJ4-1	31.4438	110.29	44.2988	3.89383	0.391569	35.899	5.68269	1.02319	0.489519	0	0	7.83409	0.48727	0	0	0	0	The 6-methyl branched tetraethers significantly affect the performance of the methylation index (MBT 0 ) in soils from an altitudinal transect at Mount Shennongjia	-1.09639	0.850528	1.21246	5.03			0.200121	48.5842	43.0944	8.32136	0.0962651
SNJ4-2	31.4437	110.29	39.0122	3.50492	0.429995	38.2017	4.53883	1.28525	0.592934	0	0	11.9958	0.438393	0	0	0	0	The 6-methyl branched tetraethers significantly affect the performance of the methylation index (MBT 1 ) in soils from an altitudinal transect at Mount Shennongjia	-1.17225	1.00369	1.20734	4.74			0.290923	42.9471	44.6187	12.4342	0.101635
SNJ5-1	31.4645	110.288	35.3457	4.32994	0.857484	33.1132	10.9887	1.95632	0.905175	0	0	10.3415	2.16212	0	0	0	0	The 6-methyl branched tetraethers significantly affect the performance of the methylation index (MBT 2 ) in soils from an altitudinal transect at Mount Shennongjia	-0.72295	0.519085	1.03704	5.81			0.283516	40.5331	46.9633	12.5036	0.149135
SNJ5-2	31.4645	110.288	35.1195	3.91497	0.903095	31.8274	12.6742	1.99593	0.970216	0	0	10.2551	2.33958	0	0	0	0	The 6-methyl branched tetraethers significantly affect the performance of the methylation index (MBT 3 ) in soils from an altitudinal transect at Mount Shennongjia	-0.660075	0.447614	1.05408	5.46			0.283017	39.9375	47.4678	12.5947	0.143253
SNJ5-3	31.4645	110.288	31.9212	3.9902	0.946561	31.17	13.892	2.20067	1.36024	0	0	11.5262	2.99294	0	0	0	0	The 6-methyl branched tetraethers significantly affect the performance of the methylation index (MBT 4 ) in soils from an altitudinal transect at Mount Shennongjia	-0.589725	0.402889	1.00822	5.7			0.322203	36.8579	48.6229	14.5191	0.159622
SNJ5-4	31.4645	110.288	36.4065	4.48498	0.987177	35.4241	8.49081	1.70863	0.609555	0	0	10.3565	1.53169	0	0	0	0	The 6-methyl branched tetraethers significantly affect the performance of the methylation index (MBT 5 ) in soils from an altitudinal transect at Mount Shennongjia	-0.849626	0.659705	1.06437	5.47			0.270711	41.8787	46.2331	11.8882	0.154239
SNJ6-1	31.4762	110.302	23.3825	7.11707	1.80818	16.9543	20.5518	3.77242	8.50109	0	0	5.5847	12.3279	0	0	0	0	The 6-methyl branched tetraethers significantly affect the performance of the methylation index (MBT 6 ) in soils from an altitudinal transect at Mount Shennongjia	-0.0266429	-0.163993	0.568694	7.5			0.477591	32.3077	49.7797	17.9126	0.332225
SNJ6-2	31.4762	110.302	24.9997	9.43548	3.21787	21.0543	19.1393	5.5641	4.22279	0	0	7.62806	4.73846	0	0	0	0	The 6-methyl branched tetraethers significantly affect the performance of the methylation index (MBT 7 ) in soils from an altitudinal transect at Mount Shennongjia	-0.234029	0.0796214	0.487188	5.66			0.307674	37.653	49.9805	12.3665	0.421512
SNJ6-4	31.4762	110.302	26.6268	9.46335	4.00376	23.3201	16.6026	4.26941	3.08111	1.0893	0.236376	7.17889	4.12831	0	0	0	0	The 6-methyl branched tetraethers significantly affect the performance of the methylation index (MBT 8 ) in soils from an altitudinal transect at Mount Shennongjia	-0.308865	0.167666	0.56075	6.4			0.283227	40.0939	48.5989	11.3072	0.435749
SNJ7-2	31.4992	110.32	27.3602	9.3352	2.93071	21.1568	18.843	5.08454	4.08872	0.857636	0.206519	6.12092	4.01579	0	0	0	0	The 6-methyl branched tetraethers significantly affect the performance of the methylation index (MBT 9 ) in soils from an altitudinal transect at Mount Shennongjia	-0.259148	0.0767544	0.526936	6.59			0.253419	39.6261	50.2372	10.1367	0.3835
SNJ7-4	31.4992	110.32	26.1039	11.5574	5.12787	18.051	18.3681	7.17296	4.80635	0	0	5.46713	3.34534	0	0	0	0	The 6-methyl branched tetraethers significantly affect the performance of the methylation index (MBT 10 ) in soils from an altitudinal transect at Mount Shennongjia	-0.195332	0.0346731	0.372433	6.76			0.241974	42.7891	48.3984	8.81247	0.509782
SNJ1-1	31.5442	109.995	55.0964	7.49021	1.08133	24.3139	6.62931	1.16807	0.656046	0	0	2.9194	0.64536	0	0	0	0	The 6-methyl branched tetraethers significantly affect the performance of the methylation index (MBT 11 ) in soils from an altitudinal transect at Mount Shennongjia	-0.960733	0.573287	0.962445	4.12			0.115203	63.6679	32.7674	3.56475	0.151613
SNJ8-4	31.4958	110.357	12.0814	10.1065	1.45725	4.8503	26.8029	4.68958	19.1775	0.997511	0.672362	3.7031	15.4617	0	0	0	0	The 6-methyl branched tetraethers significantly affect the performance of the methylation index (MBT 12 ) in soils from an altitudinal transect at Mount Shennongjia	0.488664	-0.693837	0.0585548	7.98			0.605461	23.6451	57.1902	19.1648	0.550683
SNJ2-1	31.4818	109.984	49.204	3.79042	0.51939	31.0628	7.30048	0.99461	0.40904	0	0	5.77051	0.948749	0	0	0	0	The 6-methyl branched tetraethers significantly affect the performance of the methylation index (MBT 13 ) in soils from an altitudinal transect at Mount Shennongjia	-0.971955	0.649828	1.22465	5.13			0.175148	53.5138	39.7669	6.71926	0.0902422
SNJ9-1	31.4995	110.368	44.4011	12.6509	2.18219	16.4128	14.4381	2.03732	3.07194	0	0	2.93406	1.87149	0	0	0	0	The 6-methyl branched tetraethers significantly affect the performance of the methylation index (MBT 14 ) in soils from an altitudinal transect at Mount Shennongjia	-0.470743	0.0741678	0.617033	6.06			0.155767	59.2342	35.9602	4.80555	0.287254
SNJ10-2	31.4753	110.385	16.1136	10.7047	1.27223	6.22931	28.5743	3.5847	15.9457	0.681308	1.02709	4.30071	11.5664	0	0	0	0	The 6-methyl branched tetraethers significantly affect the performance of the methylation index (MBT 15 ) in soils from an altitudinal transect at Mount Shennongjia	0.340714	-0.581156	0.194126	7.06			0.455903	28.0905	56.0424	15.8671	0.471659
SNJ10-3	31.4753	110.385	25.6151	11.7145	1.78905	13.0175	20.3092	4.61166	10.9025	0.651001	0.702386	4.71035	5.97678	0	0	0	0	The 6-methyl branched tetraethers significantly affect the performance of the methylation index (MBT 16 ) in soils from an altitudinal transect at Mount Shennongjia	-0.0383478	-0.171068	0.374069	6.84			0.320678	39.1187	50.1942	10.6871	0.390929
SNJ11-1	31.3963	110.478	69.813	3.18724	0.634722	18.9672	4.7234	0	0	0	0	2.07799	0.596446	0	0	0	0	The 6-methyl branched tetraethers significantly affect the performance of the methylation index (MBT 17 ) in soils from an altitudinal transect at Mount Shennongjia	-1.18351	0.597255	1.4449	5.03			0.11289	73.6349	23.6906	2.67444	0.060524
SNJ11-4	31.3958	110.481	34.9576	15.1611	5.02635	13.0614	16.2382	4.3473	5.1685	0	0	3.27019	2.76929	0	0	0	0	The 6-methyl branched tetraethers significantly affect the performance of the methylation index (MBT 18 ) in soils from an altitudinal transect at Mount Shennongjia	-0.244608	-0.065896	0.391191	6.63			0.206128	55.145	38.8155	6.03948	0.457228
SNJ11-3	31.396	110.481	28.1778	17.1719	4.92162	13.0725	16.5712	5.03958	7.2097	0.861499	0.419812	3.61623	2.9381	0	0	0	0	The 6-methyl branched tetraethers significantly affect the performance of the methylation index (MBT 19 ) in soils from an altitudinal transect at Mount Shennongjia	-0.145953	-0.0678184	0.268849	6.83			0.221103	50.2713	43.1744	6.55433	0.537387
SNJ12-2	31.3365	110.562	19.0086	8.50974	1.95453	3.82291	31.3777	1.166	15.736	0	0	2.27918	16.1453	0	0	0	0	The 6-methyl branched tetraethers significantly affect the performance of the methylation index (MBT 20 ) in soils from an altitudinal transect at Mount Shennongjia	0.414479	-0.891425	0.372851	8.01			0.523414	29.4729	52.1026	18.4245	0.421364
SNJ12-3	31.3363	110.562	50.0892	11.0794	3.31146	15.6329	11.2935	1.45851	3.16611	0	0	2.0526	1.91636	0	0	0	0	The 6-methyl branched tetraethers significantly affect the performance of the methylation index (MBT 21 ) in soils from an altitudinal transect at Mount Shennongjia	-0.536878	0.126717	0.719488	6.44			0.1474	64.48	31.551	3.96896	0.274539
SNJ12-5	31.3363	110.562	30.8785	16.3096	4.36017	8.32777	18.8265	2.51652	9.61012	0.746145	0.505753	2.4378	5.48114	0	0	0	0	The 6-methyl branched tetraethers significantly affect the performance of the methylation index (MBT 22 ) in soils from an altitudinal transect at Mount Shennongjia	-0.0309036	-0.353706	0.318595	7.23			0.291627	51.5482	40.5328	7.91894	0.485563
SNJ13-2	31.3443	110.637	43.9923	18.1646	5.58135	9.95858	11.9897	2.02192	4.21274	0.475277	0.314639	1.50449	1.78451	0	0	0	0	The 6-methyl branched tetraethers significantly affect the performance of the methylation index (MBT 23 ) in soils from an altitudinal transect at Mount Shennongjia	-0.365856	-0.0797642	0.426937	6.86			0.149853	67.7382	28.9728	3.289	0.43295
SNJ13-4	31.3443	110.637	63.787	9.65367	2.90591	11.8757	7.27006	0.865087	1.56511	0	0	1.24878	0.828693	0	0	0	0	The 6-methyl branched tetraethers significantly affect the performance of the methylation index (MBT 24 ) in soils from an altitudinal transect at Mount Shennongjia	-0.786664	0.209663	0.856917	5.91			0.108508	76.3466	21.5759	2.07747	0.202569
SNJ7-3	31.4992	110.32	37.7173	9.05007	4.04308	21.3863	14.5888	3.08423	2.58762	0	0	5.22692	2.31576	0	0	0	0	The 6-methyl branched tetraethers significantly affect the performance of the methylation index (MBT 25 ) in soils from an altitudinal transect at Mount Shennongjia	-0.436698	0.197094	0.687599	5.56			0.209664	50.8104	41.6469	7.54268	0.337258
AES-S-1	47.1	119.89	40.7433	4.58751	1.04199	30.325	12.4558	1.75006	0.904317	0.206816	0.264456	5.86325	1.76403	0.0312657	0.0275235	0.0192218	0.0154413	Global calibration of a novel, branched GDGT-based soil pH proxy	-0.669316	0.405672	1.04975	5.69			0.178288	46.3728	45.9065	7.72074	0.143866
QML-S-1	34.16	95.9	7.06981	5.31772	0.488554	10.9546	24.1808	6.54355	10.5656	0.311061	0.497317	10.6674	20.7168	0.59094	1.68106	0.299412	0.115312	Global calibration of a novel, branched GDGT-based soil pH proxy	0.307504	-0.317327	0.181731	7.02			0.893233	12.8761	53.053	34.0709	0.488878
HY-1	37.02	100.8	5.98557	4.74668	1.55543	4.14454	30.1102	2.79773	12.9086	0.321016	0.377649	5.77622	27.1398	2.307	1.22074	0.167774	0.441102	Global calibration of a novel, branched GDGT-based soil pH proxy	0.666212	-0.76123	0.127989	7.41			0.960918	12.2877	50.6597	37.0526	0.639464
HYX-2	36.69	101.3	7.13481	3.46766	0.513062	4.17415	31.8455	3.95305	10.1066	0.146589	0.284198	6.36838	29.3125	0.915939	1.42949	0.185178	0.16285	Global calibration of a novel, branched GDGT-based soil pH proxy	0.619781	-0.763509	0.182977	7.69			0.990594	11.1155	50.5101	38.3743	0.404279
WLHT-2	46.05	121.79	43.6122	6.16697	1.21083	16.9184	21.1696	1.06326	2.09137	0.161851	0.0536035	2.28831	4.9058	0.134113	0.1355	0.0398039	0.0484027	Global calibration of a novel, branched GDGT-based soil pH proxy	-0.326577	-0.132778	0.922822	6.24			0.188881	50.99	41.4581	7.55193	0.168438
ND-1	29.25	91.68	17.6494	4.7156	0.661367	2.95585	43.6726	2.68814	6.32291	0.255325	0.393655	1.62795	17.903	0.429442	0.409484	0.154158	0.161041	Global calibration of a novel, branched GDGT-based soil pH proxy	0.495133	-1.12818	0.444528	7.69			0.418864	23.0264	56.2885	20.6851	0.262235
ZD-1	33.77	95.66	9.17066	6.29919	0.944878	7.72723	26.9547	6.20139	15.9385	0.4685	0.601198	6.97734	15.166	0.724079	2.08632	0.358586	0.38149	Global calibration of a novel, branched GDGT-based soil pH proxy	0.414956	-0.457043	0.130902	7.3			0.638471	16.4147	57.8914	25.6938	0.498878
TR-1	35.55	102.03	7.93891	2.48058	0.416212	3.66935	42.8491	1.94274	5.17761	0.187154	0.374308	4.24908	29.4102	0.375568	0.655984	0.125084	0.148085	Global calibration of a novel, branched GDGT-based soil pH proxy	0.69757	-0.960255	0.419019	7.67			0.72357	10.8357	54.2002	34.9641	0.305749
JB-1	37.74	108.91	10.1815	2.57699	0.373647	2.98918	49.4362	1.13267	5.32238	0.28233	0.40632	2.46473	23.709	0.58309	0.542039	0	0	Global calibration of a novel, branched GDGT-based soil pH proxy	0.707838	-1.12748	0.550273	7.73			0.499257	13.1321	59.569	27.2989	0.253142
ZGEQ-2	39.87	111.18	16.769	15.6793	1.67821	4.40445	28.6937	6.25418	10.2155	1.17342	0.663472	2.41863	9.98539	0.955776	0.85279	0.141462	0.114662	Global calibration of a novel, branched GDGT-based soil pH proxy	0.344935	-0.753496	-0.0153143	7.65			0.374764	34.1265	51.4048	14.4687	0.557797
KDE-3	49.94	121.43	28.7567	7.36833	1.77182	17.9189	24.3016	3.62414	4.72437	0.755149	0.127148	4.90849	5.13753	0.172068	0.266628	0.0554178	0.111743	Global calibration of a novel, branched GDGT-based soil pH proxy	-0.150926	-0.11047	0.627994	6.13			0.237942	37.8968	51.4513	10.6519	0.287939
MH-1	53.29	122.15	34.0417	1.09113	0.293245	40.5756	9.4341	0.321043	0.669446	0.0660088	0.357568	12.1446	0.866979	0.0856005	0.0529249	0	0	Global calibration of a novel, branched GDGT-based soil pH proxy	-0.8711	0.709095	1.72295	5.41			0.260181	35.4261	51.4238	13.1501	0.0473556
NR-1	32.09	92.27	14.4493	7.57731	1.35786	14.3227	25.3019	3.78298	9.36793	0.467802	0.504858	8.7617	11.5661	0.383208	1.0946	0.532793	0.528955	Global calibration of a novel, branched GDGT-based soil pH proxy	0.122128	-0.203331	0.403581	6.35			0.513011	23.3845	53.7481	22.8674	0.440164
FZ-2	40.45	113.19	12.2317	5.16819	0.616703	4.95434	45.1385	2.16425	8.15008	0.133186	0.263448	2.33119	17.5401	0.315114	0.846153	0.0732342	0.0738435	Global calibration of a novel, branched GDGT-based soil pH proxy	0.570691	-0.934659	0.369927	7.3			0.39669	18.0166	60.8037	21.1797	0.355317
LKZ-3	29.06	90.39	19.9737	1.70189	0.168703	25.5908	23.6831	1.80767	1.49346	0.0810117	0.0320909	18.6062	5.88424	0.399734	0.220833	0.136327	0.220215	Global calibration of a novel, branched GDGT-based soil pH proxy	-0.306242	0.174581	1.11337	6.1			0.497028	21.8443	52.6881	25.4676	0.0933558
HQ-1	39.33	111.19	16.5881	4.24671	0.477686	2.8169	47.146	1.03607	6.29036	0.112676	0.528153	1.59745	17.8193	0.207613	0.890664	0.0642078	0.178133	Global calibration of a novel, branched GDGT-based soil pH proxy	0.543014	-1.16781	0.565051	7.65			0.388623	21.3125	57.9302	20.7574	0.244086
YKS-3	49.33	120.97	13.6543	9.71923	1.29074	13.2507	25.2337	4.91665	9.26136	0.294358	0.34542	8.25071	12.0812	0.435411	1.0182	0.130632	0.117298	Global calibration of a novel, branched GDGT-based soil pH proxy	0.147272	-0.239415	0.264415	6.57			0.528315	24.6643	53.3023	22.0335	0.498725
RYZ-2	29.33	88.98	12.2558	11.7475	1.70538	5.3552	29.5278	9.25855	6.56457	1.927	0.426663	4.60354	14.0909	0.809512	0.972435	0.349668	0.405394	Global calibration of a novel, branched GDGT-based soil pH proxy	0.383282	-0.641469	-0.0765595	7.56			0.535919	25.7087	53.0598	21.2315	0.589615
XJ-1	36.02	105.88	7.41004	2.21301	0.331284	4.22396	42.2131	2.18251	5.59256	0.240743	0.241696	4.96182	28.893	0.424493	0.812198	0.138575	0.121039	Global calibration of a novel, branched GDGT-based soil pH proxy	0.673235	-0.888791	0.42272	7.62			0.729046	9.95433	54.6946	35.3511	0.288877
YZ-2	35.78	104.05	7.54649	5.91127	0.451282	4.55982	29.7359	3.51808	16.0803	0.214286	0.343851	6.06393	21.908	0.725543	2.21375	0.379799	0.347693	Global calibration of a novel, branched GDGT-based soil pH proxy	0.592391	-0.686741	0.10853	7.17			0.81561	13.909	54.4522	31.6387	0.489885
YZ-3	35.78	104.05	7.75816	6.30984	0.426022	6.57452	27.5182	4.96853	15.6528	0.21951	0.27615	7.75149	19.9654	0.484129	1.91351	0.0965369	0.0851863	Global calibration of a novel, branched GDGT-based soil pH proxy	0.474391	-0.520419	0.104081	7.08			0.812987	14.494	55.2097	30.2963	0.494127
ZL-3	29.29	91.15	10.5748	5.66491	0.980274	1.81464	43.0039	2.60934	6.83571	0.315898	1.04898	1.7254	23.0124	0.372561	1.47324	0.214612	0.353437	Global calibration of a novel, branched GDGT-based soil pH proxy	0.735165	-1.27064	0.175322	7.65			0.551954	17.22	55.6284	27.1516	0.442827
LX-1	43.44	120.08	13.7869	5.78787	0.774428	4.79402	42.5368	1.78086	8.69439	0.149686	0.505803	3.05285	16.6313	0.203914	1.09784	0.0437459	0.15961	Global calibration of a novel, branched GDGT-based soil pH proxy	0.51244	-0.877391	0.390045	7.65			0.415884	20.3492	58.4615	21.1892	0.360541
ZLT-2	44.61	120.97	21.9597	9.70473	1.51292	4.49844	39.5264	1.52857	6.19311	0.229811	0.289658	1.33191	11.9752	0.348952	0.676543	0.124113	0.0999899	Global calibration of a novel, branched GDGT-based soil pH proxy	0.33624	-0.946126	0.372051	7.52			0.302264	33.1773	52.266	14.5567	0.383713
SHM-1	38.84	110.44	15.1983	3.11672	0.680623	4.30145	45.5729	1.05905	6.78699	0.267853	0.918943	1.20053	19.225	0.403154	1.26853	0	0	Global calibration of a novel, branched GDGT-based soil pH proxy	0.555906	-1.07104	0.669292	7.37			0.40954	18.9956	58.9072	22.0972	0.235736
TD-3	35.27	100.64	6.4702	2.39783	0.431194	3.30888	37.1074	3.01906	10.4447	0.114586	0.155131	3.21139	31.093	1.26344	0.759261	0.0491836	0.174699	Global calibration of a novel, branched GDGT-based soil pH proxy	0.790362	-1.01952	0.256547	7.83			0.848778	9.29923	54.1498	36.551	0.350591
HSH-3	38.04	109.24	18.6494	9.51889	1.71114	2.21498	37.0606	3.66638	5.97516	0.579599	0.591623	0.888638	17.9219	0.280179	0.495425	0.25613	0.189993	Global calibration of a novel, branched GDGT-based soil pH proxy	0.468293	-1.24836	0.199316	7.73			0.478936	29.8794	50.0884	20.0322	0.433113
NES-1	35.9058	111.453	15.9963	4.69221	0.343791	5.78736	46.8997	0.993746	6.14972	0	0.320289	2.33749	15.5484	0.213493	0.717549	0	0	Appraisal of branched glycerol dialkyl glycerol tetraether-based indices for North China	0.462572	-0.885704	0.583328	7.86667			0.339474	21.0323	60.1508	18.8169	0.255787
NES-2	35.9058	111.452	16.225	6.0963	0.501732	2.56204	50.1314	0.631623	6.08085	0.0451447	0.364502	1.2068	15.3515	0.131533	0.671504	0	0	Appraisal of branched glycerol dialkyl glycerol tetraether-based indices for North China	0.563029	-1.23992	0.445978	7.87333			0.314238	22.8231	59.8156	17.3613	0.311078
NES-3	35.9058	111.452	17.0346	5.16128	0.374482	4.56871	48.555	0.615093	5.64598	0	0.30678	2.06402	14.85	0.158756	0.66522	0	0	Appraisal of branched glycerol dialkyl glycerol tetraether-based indices for North China	0.473408	-0.980431	0.572866	7.99			0.31839	22.5704	59.6916	17.738	0.261858
NES-4	38.5606	112.711	15.6723	4.12658	0.502395	5.24277	46.8767	1.60934	5.35663	0.0695822	0.451689	3.37402	15.7555	0.172744	0.789774	0	0	Appraisal of branched glycerol dialkyl glycerol tetraether-based indices for North China	0.458024	-0.861451	0.561857	7.65333			0.367032	20.3013	59.6067	20.092	0.25276
NES-5	38.5606	112.711	15.6687	4.19996	0.492426	4.68863	48.7199	1.37764	4.91545	0.0884823	0.440708	2.39782	16.191	0.145662	0.673673	0	0	Appraisal of branched glycerol dialkyl glycerol tetraether-based indices for North China	0.496821	-0.961889	0.562273	7.73333			0.34805	20.3611	60.2308	19.4082	0.254644
NES-6	38.5606	112.711	15.7418	5.09314	0.584269	5.25527	45.6255	1.85786	6.01387	0.0808751	0.479777	3.02682	15.2156	0.184876	0.840287	0	0	Appraisal of branched glycerol dialkyl glycerol tetraether-based indices for North China	0.456688	-0.866057	0.480112	7.84667			0.358534	21.4192	59.3131	19.2676	0.292339
NES-7	39.4475	112.888	11.557	2.48994	0.274553	0.947094	47.5327	0.239084	9.08159	0	0	0.575129	27.3029	0	0	0	0	Appraisal of branched glycerol dialkyl glycerol tetraether-based indices for North China	0.808689	-1.69163	0.661044	7.71			0.575044	14.3215	57.8005	27.878	0.212202
NES-8	39.4475	112.888	9.52477	2.2525	0.181763	1.91553	44.0866	0.525344	8.13839	0	0	0.657721	31.0647	0.169645	1.48301	0	0	Appraisal of branched glycerol dialkyl glycerol tetraether-based indices for North China	0.846472	-1.46546	0.614729	7.71667			0.689586	11.959	54.6659	33.3751	0.218749
NES-9	39.4475	112.888	10.7429	2.3317	0.26882	2.73638	47.5592	0.664024	6.97574	0.102081	0.340592	1.21789	25.7399	0.181623	1.13906	0	0	Appraisal of branched glycerol dialkyl glycerol tetraether-based indices for North China	0.746703	-1.26803	0.653167	7.88333			0.535987	13.3435	58.3781	28.2785	0.215037
NES-10	40.2592	113.739	12.7108	6.69107	0.599016	4.19018	41.5074	1.36826	10.2894	0.0944577	0.467223	1.91948	18.6112	0.224043	1.32752	0	0	Appraisal of branched glycerol dialkyl glycerol tetraether-based indices for North China	0.587513	-0.992992	0.321612	7.89667			0.449272	20.0008	57.9169	22.0822	0.394438
NES-11	40.2592	113.739	13.7417	7.56975	0.662444	2.62341	41.952	1.66832	9.64283	0.172202	0.45731	1.61339	18.3057	0.251875	1.33916	0	0	Appraisal of branched glycerol dialkyl glycerol tetraether-based indices for North China	0.604742	-1.15297	0.248338	7.93			0.446862	21.9739	56.516	21.5101	0.404782
NES-12	40.2592	113.739	11.2733	5.79656	0.602272	2.54636	44.3215	1.37724	10.0617	0.101547	0.40082	1.59387	20.2765	0.255846	1.39248	0	0	Appraisal of branched glycerol dialkyl glycerol tetraether-based indices for North China	0.6989	-1.19319	0.284749	7.98333			0.466638	17.6721	58.8092	23.5187	0.396166
NES-13	40.8947	114.755	11.1837	3.83917	0.563687	7.26665	41.4558	2.14666	6.04222	0.0612741	0.534901	4.86166	20.8054	0.254043	0.984832	0	0	Appraisal of branched glycerol dialkyl glycerol tetraether-based indices for North China	0.479911	-0.710417	0.488881	7.81333			0.526802	15.5866	57.5075	26.9059	0.318642
NES-14	40.8947	114.755	10.8142	3.55849	0.485404	7.8997	41.4886	2.18217	5.65563	0.0668456	0.511248	4.8508	21.297	0.259378	0.930552	0	0	Appraisal of branched glycerol dialkyl glycerol tetraether-based indices for North China	0.475116	-0.692333	0.513202	7.79667			0.529433	14.8581	57.8042	27.3377	0.304838
NES-15	40.8947	114.755	10.8804	3.71636	0.531359	8.2016	41.0358	2.28666	5.73126	0.0436065	0.543365	5.3743	20.5379	0.234425	0.882992	0	0	Appraisal of branched glycerol dialkyl glycerol tetraether-based indices for North China	0.452109	-0.656627	0.502253	7.63333			0.52627	15.1281	57.8423	27.0296	0.315907
NES-16	41.2656	114.876	10.417	3.46234	0.719485	8.21302	40.8019	2.31323	4.71265	0.0980517	0.422946	5.11928	22.7119	0.252103	0.755999	0	0	Appraisal of branched glycerol dialkyl glycerol tetraether-based indices for North China	0.470222	-0.677963	0.508618	7.38333			0.567811	14.5988	56.5618	28.8393	0.335733
NES-17	41.2656	114.876	11.1611	3.86616	0.757404	7.30338	41.054	2.55379	5.34585	0.0980602	0.434946	5.17644	21.1366	0.230867	0.881397	0	0	Appraisal of branched glycerol dialkyl glycerol tetraether-based indices for North China	0.469008	-0.697516	0.458806	7.10333			0.544138	15.7847	56.79	27.4253	0.340898
NES-18	41.2656	114.876	11.1288	3.89266	0.80774	7.71587	41.2645	2.74141	5.2532	0.118843	0.403523	5.13274	20.4711	0.273695	0.796045	0	0	Appraisal of branched glycerol dialkyl glycerol tetraether-based indices for North China	0.459023	-0.681679	0.453408	6.97333			0.522737	15.8292	57.4973	26.6735	0.347974
NES-19	41.7667	115.183	12.6251	3.66805	0.756717	12.6802	37.7773	2.19612	4.57895	0.128571	0.246315	7.1288	17.3601	0.28039	0.573405	0	0	Appraisal of branched glycerol dialkyl glycerol tetraether-based indices for North China	0.276407	-0.444582	0.635006	6.87667			0.485337	17.0498	57.6075	25.3427	0.303902
NES-20	41.7667	115.183	12.3405	3.09157	0.690251	12.1937	39.3068	2.34001	3.74602	0.136957	0.200079	6.78094	18.388	0.250713	0.534386	0	0	Appraisal of branched glycerol dialkyl glycerol tetraether-based indices for North China	0.302658	-0.482963	0.654847	6.80667			0.488713	16.1224	57.9236	25.9541	0.277383
NES-21	41.7667	115.183	12.5009	3.6853	0.714816	11.0381	39.3001	2.45896	4.55899	0.110087	0.226995	6.55907	17.9683	0.337747	0.540785	0	0	Appraisal of branched glycerol dialkyl glycerol tetraether-based indices for North China	0.322934	-0.512473	0.583317	6.82667			0.487251	16.901	57.6932	25.4059	0.302641
NES-22	42.1103	115.448	9.65702	3.06444	0.711462	6.17858	42.2759	2.15399	5.13399	0.132329	0.40347	4.35663	24.8927	0.226945	0.812583	0	0	Appraisal of branched glycerol dialkyl glycerol tetraether-based indices for North China	0.565396	-0.804523	0.482095	7.55667			0.603646	13.4329	56.2782	30.2889	0.334057
NES-23	42.1103	115.448	10.996	4.11889	0.642189	10.2762	36.8511	2.13628	7.45212	0.0530803	0.428879	6.272	19.4175	0.266553	1.08918	0	0	Appraisal of branched glycerol dialkyl glycerol tetraether-based indices for North China	0.378731	-0.531517	0.531572	7.57667			0.54511	15.7571	57.1976	27.0453	0.342911
NES-24	42.1103	115.448	10.2323	3.52183	0.682401	7.11322	39.9509	2.71598	5.86942	0.090553	0.48475	4.86444	23.2027	0.277739	0.993837	0	0	Appraisal of branched glycerol dialkyl glycerol tetraether-based indices for North China	0.505835	-0.722026	0.444154	7.63			0.59636	14.4365	56.2248	29.3387	0.338491
NES-25	42.4789	115.822	13.8851	3.01184	0.527895	11.134	42.5864	1.68753	2.98839	0.109387	0.17193	5.27567	18.0886	0.189855	0.343469	0	0	Appraisal of branched glycerol dialkyl glycerol tetraether-based indices for North China	0.329581	-0.567909	0.726232	7.42333			0.434923	17.4248	58.6776	23.8976	0.233439
NES-26	42.4789	115.822	13.6486	2.98059	0.450523	11.3727	41.8693	1.83823	2.97489	0.0786926	0.154409	6.12855	17.8826	0.186481	0.434382	0	0	Appraisal of branched glycerol dialkyl glycerol tetraether-based indices for North China	0.311133	-0.533282	0.71537	7.19			0.450981	17.0797	58.2883	24.632	0.227266
NES-27	42.4789	115.822	13.273	2.78848	0.470495	13.0628	40.2774	1.67592	3.03835	0.113596	0.251631	7.02443	17.4347	0.183383	0.405732	0	0	Appraisal of branched glycerol dialkyl glycerol tetraether-based indices for North China	0.268309	-0.458347	0.770783	7.01667			0.45855	16.532	58.4197	25.0483	0.225591
NES-28	43.1131	117.209	20.5571	3.82254	0.491536	19.4635	32.1902	1.79757	2.77809	0.101401	0.150563	8.09781	10.099	0.164513	0.286194	0	0	Appraisal of branched glycerol dialkyl glycerol tetraether-based indices for North China	-0.019595	-0.18593	0.852538	6.63667			0.352286	24.8712	56.4813	18.6476	0.19322
NES-29	43.1131	117.209	20.512	4.92873	0.658916	18.8405	30.9654	2.3506	3.73872	0.218989	0.203649	6.58887	10.4233	0.190862	0.379413	0	0	Appraisal of branched glycerol dialkyl glycerol tetraether-based indices for North China	0.00402823	-0.211548	0.732881	6.48333			0.34157	26.0997	56.3179	17.5825	0.239335
NES-30	43.1131	117.209	18.5746	5.90342	0.865848	16.716	31.728	2.883	4.68377	0.182352	0.214226	7.00356	10.5078	0.204584	0.532885	0	0	Appraisal of branched glycerol dialkyl glycerol tetraether-based indices for North China	0.0597528	-0.250575	0.603847	6.73			0.361477	25.3439	56.4073	18.2488	0.301261
NES-31	43.2964	118.403	12.5749	4.50905	0.760742	3.30175	47.1489	2.10896	5.6347	0.172656	0.419975	1.80753	20.1856	0.315269	1.05987	0	0	Appraisal of branched glycerol dialkyl glycerol tetraether-based indices for North China	0.62869	-1.11988	0.380031	7.77667			0.435934	17.8447	58.787	23.3683	0.337946
NES-32	43.2964	118.403	11.8674	2.87804	0.378957	3.89302	50.375	1.6671	4.08879	0.0993018	0.235397	1.78314	21.8046	0.239251	0.68994	0	0	Appraisal of branched glycerol dialkyl glycerol tetraether-based indices for North China	0.645591	-1.10436	0.540021	7.72			0.434653	15.1244	60.3586	24.517	0.240403
NES-33	43.2964	118.403	11.6173	3.45065	0.549972	3.76251	48.6284	2.19571	4.86555	0.20645	0.336921	1.76227	21.6323	0.253668	0.738236	0	0	Appraisal of branched glycerol dialkyl glycerol tetraether-based indices for North China	0.651022	-1.1044	0.435183	7.72667			0.446539	15.6179	59.9956	24.3865	0.29137
NES-34	43.8522	119.561	14.6628	4.41515	0.71593	5.64116	45.6027	2.00386	5.53308	0.0985157	0.396047	2.53564	17.3709	0.238607	0.785656	0	0	Appraisal of branched glycerol dialkyl glycerol tetraether-based indices for North China	0.488911	-0.886575	0.500112	7.80667			0.388466	19.7939	59.2754	20.9308	0.295395
NES-35	43.8522	119.561	14.6753	4.58179	0.801619	4.94129	46.0083	1.89951	5.89807	0.0996454	0.461985	2.71415	16.9333	0.159728	0.825289	0	0	Appraisal of branched glycerol dialkyl glycerol tetraether-based indices for North China	0.501918	-0.914968	0.480962	7.85333			0.385625	20.0587	59.3088	20.6325	0.308346
NES-36	43.8522	119.561	15.1863	4.88805	0.84283	4.18776	47.0302	2.01516	6.04708	0.127678	0.357741	2.19367	16.135	0.208814	0.779715	0	0	Appraisal of branched glycerol dialkyl glycerol tetraether-based indices for North China	0.51863	-0.995559	0.44817	7.90667			0.357857	20.9172	59.7656	19.3172	0.314273
NES-37	44.3642	120.522	19.4149	4.46743	0.581127	8.20661	43.2137	2.22671	3.68345	0.0767928	0.259072	3.36467	13.9114	0.185385	0.40876	0	0	Appraisal of branched glycerol dialkyl glycerol tetraether-based indices for North China	0.301626	-0.693445	0.615553	7.74333			0.335977	24.4635	57.6663	17.8702	0.230126
NES-38	44.3642	120.522	19.1303	5.4519	0.719907	7.73042	42.4921	2.44934	4.79979	0.0919312	0.27781	3.21649	12.929	0.192683	0.51832	0	0	Appraisal of branched glycerol dialkyl glycerol tetraether-based indices for North China	0.312307	-0.704383	0.531423	7.77333			0.321479	25.3021	57.8414	16.8565	0.272377
NES-39	44.3642	120.522	19.0153	4.9999	0.801275	8.27037	42.6548	2.25548	4.44381	0.062191	0.373845	3.14142	13.2578	0.168702	0.555066	0	0	Appraisal of branched glycerol dialkyl glycerol tetraether-based indices for North China	0.309737	-0.690156	0.575275	7.65			0.322026	24.8165	58.0605	17.123	0.266051
NES-40	44.6789	121.056	24.4187	7.27889	1.16296	15.5067	31.0714	2.32815	4.16581	0.120001	0.228473	5.64009	7.57682	0.139643	0.362278	0	0	Appraisal of branched glycerol dialkyl glycerol tetraether-based indices for North China	-0.00961552	-0.261885	0.61866	7.12333			0.283758	32.8606	53.4206	13.7188	0.29229
NES-41	44.6789	121.056	21.7551	5.77619	0.93521	16.0308	33.6792	2.32497	3.70544	0.112669	0.244959	5.78916	9.06151	0.185925	0.398835	0	0	Appraisal of branched glycerol dialkyl glycerol tetraether-based indices for North China	0.0422313	-0.291989	0.668782	7.11333			0.298746	28.4665	56.0981	15.4354	0.268618
NES-42	44.6789	121.056	23.9717	6.27004	1.044	14.6396	33.3371	2.28754	3.95585	0.107167	0.263373	5.81857	7.80732	0.159461	0.338358	0	0	Appraisal of branched glycerol dialkyl glycerol tetraether-based indices for North China	0.0220695	-0.303444	0.654363	7.11			0.284011	31.2857	54.5906	14.1237	0.267152
NES-43	45.1578	121.568	30.9958	4.65165	0.40724	18.4902	30.8099	1.28454	2.44177	0.0818462	0.122414	4.31324	6.08286	0.105561	0.212935	0	0	Appraisal of branched glycerol dialkyl glycerol tetraether-based indices for North China	-0.127881	-0.20894	0.920975	6.6			0.210874	36.0547	53.2307	10.7146	0.151606
NES-44	45.1578	121.568	28.2673	6.17262	0.70783	15.154	32.7939	1.44908	3.68025	0.110232	0.163064	4.51982	6.59387	0.099993	0.288065	0	0	Appraisal of branched glycerol dialkyl glycerol tetraether-based indices for North China	-0.0350204	-0.301474	0.755651	6.65667			0.231787	35.1478	53.3505	11.5017	0.215897
NES-45	45.1578	121.568	28.4992	5.3976	0.554149	16.0284	33.2868	1.37877	3.38053	0.110071	0.145007	4.26311	6.52272	0.131354	0.302284	0	0	Appraisal of branched glycerol dialkyl glycerol tetraether-based indices for North China	-0.0429976	-0.292673	0.817632	6.6			0.218712	34.4509	54.3296	11.2195	0.188846
NES-46	45.78	121.595	38.0824	4.881	0.624318	22.6549	23.2579	1.50371	1.92544	0.103815	0.0687739	3.56104	3.103	0.0702845	0.163454	0	0	Appraisal of branched glycerol dialkyl glycerol tetraether-based indices for North China	-0.343666	-0.00239575	0.978314	5.88333			0.145146	43.5877	49.5145	6.89778	0.140628
NES-47	45.78	121.595	33.7622	7.2018	1.03981	20.7111	24.7554	1.85333	3.11346	0.121257	0.0916472	3.55095	3.49343	0.108601	0.197106	0	0	Appraisal of branched glycerol dialkyl glycerol tetraether-based indices for North China	-0.249183	-0.0660731	0.779289	5.90667			0.154936	42.0038	50.6461	7.3501	0.220966
NES-48	45.78	121.595	35.749	4.13257	0.472195	21.7878	26.0222	1.25956	1.93447	0.0783253	0.073216	4.30954	3.93964	0.0929618	0.148456	0	0	Appraisal of branched glycerol dialkyl glycerol tetraether-based indices for North China	-0.278228	-0.0599711	1.02819	5.92333			0.172541	40.3538	51.1556	8.4906	0.125811
NES-49	46.3781	122.436	32.2698	6.5911	0.684761	16.0347	28.5162	1.5614	3.89707	0.0812152	0.0810906	4.83359	5.0648	0.114542	0.269653	0	0	Appraisal of branched glycerol dialkyl glycerol tetraether-based indices for North China	-0.139792	-0.206606	0.772697	6.37667			0.222181	39.5457	50.1717	10.2826	0.201302
NES-50	46.3781	122.436	36.9278	5.66614	0.48015	18.3938	25.6021	1.11912	2.66786	0.0748699	0.0812969	4.51072	4.14925	0.125185	0.201661	0	0	Appraisal of branched glycerol dialkyl glycerol tetraether-based indices for North China	-0.256029	-0.113585	0.911328	6.07667			0.196836	43.0741	47.9391	8.98682	0.153838
NES-51	46.3781	122.436	34.4112	4.76173	0.477232	18.3121	28.5528	1.13021	2.24818	0.0912639	0.0770681	4.94493	4.74543	0.0919049	0.155952	0	0	Appraisal of branched glycerol dialkyl glycerol tetraether-based indices for North China	-0.201548	-0.155868	0.951744	6.19333			0.206772	39.6502	50.4116	9.93821	0.144166
NES-52	49.5264	119.704	24.5831	4.46887	0.669119	20.1445	30.0277	1.96167	3.58506	0.158331	0.147017	5.91515	7.88012	0.118144	0.341323	0	0	Appraisal of branched glycerol dialkyl glycerol tetraether-based indices for North China	-0.0745949	-0.16276	0.842327	6.67333			0.274959	29.7211	56.0242	14.2547	0.195387
NES-53	49.5264	119.704	25.0178	4.30823	0.650432	22.3081	28.2586	1.91547	3.31081	0.132831	0.11174	6.48564	7.12372	0.122437	0.254173	0	0	Appraisal of branched glycerol dialkyl glycerol tetraether-based indices for North China	-0.131982	-0.0894874	0.88105	6.45			0.269137	29.9765	56.0375	13.986	0.187117
NES-54	49.5264	119.704	26.5193	3.81048	0.483915	22.8763	28.3792	1.71008	2.9485	0.107992	0.116169	5.88146	6.77802	0.130963	0.257624	0	0	Appraisal of branched glycerol dialkyl glycerol tetraether-based indices for North China	-0.151888	-0.0872586	0.951705	6.27667			0.246988	30.8137	56.1382	13.0481	0.155071
NES-55	49.8867	119.995	17.8922	8.25714	1.36835	18.7163	23.73	6.79511	7.72683	0.499997	0.232202	5.72434	7.96956	0.282604	0.805383	0	0	Appraisal of branched glycerol dialkyl glycerol tetraether-based indices for North China	-0.00516507	-0.112941	0.38598	6.51			0.322618	27.5177	57.7004	14.7819	0.399519
NES-56	49.8867	119.995	18.5675	8.04133	1.71411	19.6075	23.6382	7.00094	6.33245	0.552801	0.200514	5.71514	7.61781	0.319258	0.692408	0	0	Appraisal of branched glycerol dialkyl glycerol tetraether-based indices for North China	-0.0381902	-0.091424	0.404466	6.65667			0.308307	28.323	57.3324	14.3446	0.404956
NES-57	49.8867	119.995	18.0446	8.19918	1.33855	20.0206	23.0366	6.25532	7.39348	0.419899	0.248601	6.00108	7.89697	0.297563	0.847673	0	0	Appraisal of branched glycerol dialkyl glycerol tetraether-based indices for North China	-0.0338522	-0.0750948	0.420524	6.53			0.322782	27.5823	57.3744	15.0433	0.39432
NES-58	50.18	120.151	30.5351	5.26097	0.982375	20.3925	26.003	2.15063	2.21774	0.280015	0.126415	5.75876	5.93423	0.157694	0.200553	0	0	Appraisal of branched glycerol dialkyl glycerol tetraether-based indices for North China	-0.203687	-0.0868057	0.837041	6.39			0.252029	36.7785	51.1703	12.0512	0.196466
NES-59	50.18	120.151	27.9461	4.11125	0.787136	21.432	26.2696	1.94933	2.66357	0.216767	0.127891	7.66661	6.44814	0.168647	0.212928	0	0	Appraisal of branched glycerol dialkyl glycerol tetraether-based indices for North China	-0.193812	-0.0509118	0.91102	6.42667			0.295897	32.8445	52.6592	14.4963	0.173104
NES-60	50.18	120.151	25.094	5.81209	1.27226	19.9306	27.147	2.95213	3.2992	0.313676	0.152659	6.54636	6.94975	0.25963	0.270622	0	0	Appraisal of branched glycerol dialkyl glycerol tetraether-based indices for North China	-0.120323	-0.109845	0.710737	6.43			0.286678	32.1783	53.7953	14.0264	0.259697
NES-61	51.8089	121.861	43.7821	1.70974	0.332833	35.1444	5.8794	0.888564	0.325381	0.298868	0.0293142	9.99258	1.54495	0.0343781	0.0375444	0	0	Appraisal of branched glycerol dialkyl glycerol tetraether-based indices for North China	-1.03787	0.783874	1.48253	5.31667			0.28124	45.8246	42.5659	11.6095	0.0518369
NES-62	51.8089	121.861	47.3642	1.35567	0.24889	41.0466	1.29677	0.507084	0.0348376	0.25509	0	7.86571	0.0251104	0	0	0	0	Appraisal of branched glycerol dialkyl glycerol tetraether-based indices for North China	-1.77788	1.56823	1.67635	4.14667			0.186353	48.9688	43.1404	7.89082	0.0378495
NES-63	51.8089	121.861	48.7442	1.65608	0.256313	36.8558	3.03108	0.616702	0.189082	0.20767	0.0218859	7.2694	1.0703	0.0390459	0.0425242	0	0	Appraisal of branched glycerol dialkyl glycerol tetraether-based indices for North China	-1.30406	1.03176	1.57592	4.85667			0.209084	50.6566	40.9222	8.42127	0.042812
NES-64	51.5433	121.726	54.9351	1.00216	0.115145	37.7032	0.531247	0.394497	0.0264281	0.130077	0	5.01973	0.142423	0	0	0	0	Appraisal of branched glycerol dialkyl glycerol tetraether-based indices for North China	-2.07842	1.80221	1.8217	4.10333			0.135013	56.0524	38.7854	5.16215	0.0219874
NES-65	51.5433	121.726	51.9548	0.512704	0.227213	36.5064	2.07482	0.373511	0.0379106	0.190971	0	7.65038	0.47136	0	0	0	0	Appraisal of branched glycerol dialkyl glycerol tetraether-based indices for North China	-1.53387	1.23911	1.99921	4.18			0.21051	52.6947	39.1836	8.12174	0.0183535
NES-66	51.5433	121.726	55.7375	0.405189	0.0685281	34.9495	1.3634	0.251505	0.0438348	0.0663074	0	6.87565	0.238565	0	0	0	0	Appraisal of branched glycerol dialkyl glycerol tetraether-based indices for North China	-1.75519	1.41678	2.14018	4.49667			0.195914	56.2113	36.6745	7.11421	0.00964656
NES-67	51.1483	121.289	51.1467	0.639055	0.0706861	40.8877	0.979946	0.37524	0	0.133217	0	5.56624	0.201246	0	0	0	0	Appraisal of branched glycerol dialkyl glycerol tetraether-based indices for North China	-1.89189	1.5947	1.95779	4.03333			0.137755	51.8564	42.3761	5.76749	0.0150498
NES-68	51.1483	121.289	42.2632	0.878601	0.142606	45.3202	1.4905	0.529335	0.0722268	0.145416	0	8.8223	0.335694	0	0	0	0	Appraisal of branched glycerol dialkyl glycerol tetraether-based indices for North China	-1.67425	1.47199	1.79384	4.59333			0.195639	43.2844	47.5577	9.15799	0.0268876
NES-69	51.1483	121.289	42.9427	0.684305	0.11718	44.605	1.93914	0.519706	0.0162877	0.182085	0	8.63845	0.355126	0	0	0	0	Appraisal of branched glycerol dialkyl glycerol tetraether-based indices for North China	-1.59791	1.36562	1.86161	4.53667			0.193227	43.7442	47.2623	8.99357	0.0210008
NES-70	50.9089	121.394	50.4663	0.645304	0.0655687	40.6797	1.21887	0.326513	0.101386	0.0863101	0	6.18241	0.227643	0	0	0	0	Appraisal of branched glycerol dialkyl glycerol tetraether-based indices for North China	-1.78048	1.5105	1.97215	4.44333			0.15299	51.1772	42.4127	6.41005	0.0151716
NES-71	50.9089	121.394	43.1594	0.62124	0.0808873	42.5172	0.907769	0.385831	0	0.108863	0	12.0515	0.167226	0	0	0	0	Appraisal of branched glycerol dialkyl glycerol tetraether-based indices for North China	-1.92711	1.70554	1.9298	4.5			0.281376	43.8616	43.9197	12.2188	0.0178519
NES-72	50.9089	121.394	43.0873	0.767704	0.184399	44.5359	1.33758	0.495847	0	0.178958	0	9.07985	0.332431	0	0	0	0	Appraisal of branched glycerol dialkyl glycerol tetraether-based indices for North China	-1.71724	1.50657	1.84103	4.46333			0.205179	44.0394	46.5483	9.41229	0.0258065
NES-73	50.6911	121.331	22.3437	7.44737	1.03313	25.1223	19.8412	5.4548	4.583	0.599906	0.147108	6.90589	5.93929	0.18691	0.395369	0	0	Appraisal of branched glycerol dialkyl glycerol tetraether-based indices for North China	-0.231051	0.0942405	0.56572	6.15667			0.28568	30.8242	55.7483	13.4275	0.308642
NES-74	50.6911	121.331	16.4949	7.82433	0.813007	22.0129	21.9648	6.4822	6.50481	0.636674	0.187204	7.51025	8.74914	0.247671	0.572119	0	0	Appraisal of branched glycerol dialkyl glycerol tetraether-based indices for North China	-0.0741966	-0.0171723	0.430015	6.35			0.369719	25.1322	57.7886	17.0792	0.376025
NES-75	50.6911	121.331	18.8871	7.39937	0.887126	22.2948	21.6525	6.30053	5.78897	0.558463	0.205974	7.51173	7.72903	0.219074	0.565397	0	0	Appraisal of branched glycerol dialkyl glycerol tetraether-based indices for North China	-0.121282	0.00623678	0.477988	6.28667			0.346797	27.1736	56.8012	16.0252	0.337593
NES-76	50.4908	120.925	28.2057	4.12075	0.701711	36.5676	12.3301	2.896	1.45692	0.495553	0.0652983	10.1317	2.85066	0.0558746	0.12214	0	0	Appraisal of branched glycerol dialkyl glycerol tetraether-based indices for North China	-0.630808	0.488017	0.96526	5.94			0.2655	33.0282	53.8115	13.1603	0.167256
NES-77	50.4908	120.925	31.1672	3.08733	0.463602	38.8746	10.5055	1.99543	1.15431	0.340568	0.045477	9.60436	2.57014	0.0852894	0.106238	0	0	Appraisal of branched glycerol dialkyl glycerol tetraether-based indices for North China	-0.729576	0.56909	1.13926	5.70333			0.246547	34.7181	52.9159	12.366	0.115632
NES-78	50.4908	120.925	28.1943	4.31639	0.729666	37.1118	12.2106	2.95471	1.40352	0.545803	0.0574369	9.57185	2.67073	0.112694	0.120499	0	0	Appraisal of branched glycerol dialkyl glycerol tetraether-based indices for North China	-0.639017	0.496525	0.953354	5.81667			0.248215	33.2404	54.2839	12.4758	0.173756
NES-79	48.8833	119.799	33.5991	4.30176	0.462601	26.8869	21.2443	1.51482	2.14345	0.177179	0.0770568	5.24355	4.34931	0	0	0	0	Appraisal of branched glycerol dialkyl glycerol tetraether-based indices for North China	-0.366332	0.0987856	1.01699	5.86333			0.199307	38.3635	52.0437	9.59286	0.136248
NES-80	48.8833	119.799	32.9811	4.48354	0.478537	26.1505	21.6107	1.56472	2.57148	0	0	5.40114	4.75815	0	0	0	0	Appraisal of branched glycerol dialkyl glycerol tetraether-based indices for North China	-0.341154	0.0779306	0.99019	5.93333			0.21271	37.9432	51.8975	10.1593	0.143388
NES-81	48.8833	119.799	32.4325	4.25449	0.536876	26.2347	22.4817	1.39284	2.59234	0	0	5.4451	4.6294	0	0	0	0	Appraisal of branched glycerol dialkyl glycerol tetraether-based indices for North China	-0.326355	0.0676356	1.01655	5.89			0.206799	37.2239	52.7016	10.0745	0.14314
NES-82	48.3169	119.775	30.2361	6.48804	1.07119	23.7485	21.8714	2.52694	2.94027	0.237937	0.112407	5.84435	4.92285	0	0	0	0	Appraisal of branched glycerol dialkyl glycerol tetraether-based indices for North China	-0.286698	0.0431451	0.777305	6.40333			0.23602	37.7953	51.4375	10.7672	0.228346
NES-83	48.3169	119.775	33.0705	6.21336	0.890176	21.7518	23.2935	2.14452	2.53882	0	0	5.69977	4.39755	0	0	0	0	Appraisal of branched glycerol dialkyl glycerol tetraether-based indices for North China	-0.288874	-0.00377176	0.816861	6.29667			0.224159	40.174	49.7287	10.0973	0.198977
NES-84	48.3169	119.775	32.4959	4.76595	0.646204	23.2251	24.1457	1.84466	2.15282	0	0	5.89719	4.82656	0	0	0	0	Appraisal of branched glycerol dialkyl glycerol tetraether-based indices for North China	-0.287674	0.00224312	0.925777	6.30667			0.226379	37.908	51.3682	10.7237	0.159817
NES-85	47.9267	119.521	28.5532	7.36499	1.1728	22.1678	22.1172	3.72605	3.36255	0.323072	0.1003	5.63804	4.87359	0.30531	0.295135	0	0	Appraisal of branched glycerol dialkyl glycerol tetraether-based indices for North China	-0.246878	0.0129191	0.660215	6.30667			0.237363	37.091	51.797	11.1121	0.261805
NES-86	47.9267	119.521	30.6357	7.28253	0.711385	24.8004	18.9844	3.50654	3.59158	0.21693	0.130134	5.30607	4.41338	0.123656	0.29735	0	0	Appraisal of branched glycerol dialkyl glycerol tetraether-based indices for North China	-0.334347	0.109484	0.710808	6.28			0.221982	38.6296	51.23	10.1405	0.225353
NES-87	47.9267	119.521	23.2967	8.95107	1.30013	19.4423	23.8809	4.62542	5.27886	0.37804	0.149027	5.29116	6.77898	0.205396	0.422033	0	0	Appraisal of branched glycerol dialkyl glycerol tetraether-based indices for North China	-0.103908	-0.0932845	0.498037	6.54333			0.278607	33.5479	53.7546	12.6976	0.344324
NES-88	47.5253	119.423	24.9707	7.69694	1.54663	21.3482	23.5264	4.17353	4.45687	0.547811	0.106128	5.04206	6.0039	0.17229	0.408602	0	0	Appraisal of branched glycerol dialkyl glycerol tetraether-based indices for North China	-0.153746	-0.0488237	0.59129	6.57			0.246152	34.2142	54.1589	11.6268	0.315371
NES-89	47.5253	119.423	23.9133	7.4044	1.59986	21.7109	23.8012	4.46872	4.32952	0.586396	0.148762	5.42052	6.08613	0.151034	0.379191	0	0	Appraisal of branched glycerol dialkyl glycerol tetraether-based indices for North China	-0.147511	-0.0420145	0.584631	6.62			0.252826	32.9176	55.0455	12.0369	0.322141
NES-90	47.5253	119.423	25.2494	7.56426	1.56771	20.5078	24.2986	4.27283	4.12902	0.506923	0.14608	5.29966	5.93405	0.144308	0.379329	0	0	Appraisal of branched glycerol dialkyl glycerol tetraether-based indices for North China	-0.146299	-0.0687309	0.587215	6.69			0.250717	34.3814	53.8613	11.7574	0.311206
NES-91	47.3167	119.761	23.3219	6.57066	1.22217	21.0864	25.8788	4.01204	4.15604	0.526347	0.144253	5.87357	6.62898	0.209	0.369944	0	0	Appraisal of branched glycerol dialkyl glycerol tetraether-based indices for North China	-0.117078	-0.0812681	0.622867	6.56			0.266209	31.1147	55.8038	13.0815	0.289735
NES-92	47.3167	119.761	25.0936	5.40825	0.884039	29.0115	18.6764	3.86179	3.61497	0.52578	0.114908	6.7506	5.55068	0.167773	0.33975	0	0	Appraisal of branched glycerol dialkyl glycerol tetraether-based indices for North China	-0.319205	0.169122	0.766157	6.33333			0.257954	31.3859	55.8053	12.8088	0.228648
NES-93	47.3167	119.761	21.0952	6.00825	0.698929	24.4502	23.2965	4.18001	4.47922	0.432413	0.119469	7.2637	7.40417	0.171202	0.400804	0	0	Appraisal of branched glycerol dialkyl glycerol tetraether-based indices for North China	-0.161618	0.0141019	0.650344	6.31			0.307202	27.8023	56.9578	15.2399	0.266384
NES-94	46.8944	119.963	20.1153	8.82359	1.48715	22.4141	20.9388	5.73854	5.87998	0.781347	0.217355	6.67689	6.25141	0.219649	0.455954	0	0	Appraisal of branched glycerol dialkyl glycerol tetraether-based indices for North China	-0.1451	0.0293463	0.465464	6.67667			0.298211	30.426	55.9701	13.6039	0.387756
NES-95	46.8944	119.963	19.9557	9.19954	1.75704	20.3406	21.8204	6.46765	5.63973	0.91206	0.269863	6.46486	6.43408	0.23684	0.501659	0	0	Appraisal of branched glycerol dialkyl glycerol tetraether-based indices for North China	-0.108512	-0.0228646	0.410274	6.56			0.305945	30.9123	55.4503	13.6374	0.411281
NES-96	46.8944	119.963	21.24	9.04112	1.59206	24.4057	18.8408	6.19304	4.89946	0.888958	0.200662	6.69214	5.39124	0.21562	0.399197	0	0	Appraisal of branched glycerol dialkyl glycerol tetraether-based indices for North China	-0.222947	0.10834	0.476581	6.38333			0.279407	31.8732	55.4286	12.6982	0.383558
WLPS-1	35.3561	107.685	13.1872	5.97225	0.599136	9.68003	37.3461	2.94164	6.9513	0	0	5.78488	16.1334	0.347906	1.05625	0	0	Appraisal of branched glycerol dialkyl glycerol tetraether-based indices for North China	0.335838	-0.53884	0.409146	7.82			0.466086	19.7586	56.919	23.3224	0.362907
WLPS-2	35.3544	107.684	12.994	6.91146	0.819397	6.76304	40.0286	2.60661	7.36617	0	0	3.72657	18.7842	0	0	0	0	Appraisal of branched glycerol dialkyl glycerol tetraether-based indices for North China	0.4553	-0.748713	0.317172	7.91667			0.481086	20.7248	56.7644	22.5108	0.412561
WLPS-3	35.3544	107.684	16.0927	10.8784	1.10938	2.54719	39.1304	1.93632	10.2411	0	0	2.28341	15.781	0	0	0	0	Appraisal of branched glycerol dialkyl glycerol tetraether-based indices for North China	0.500635	-1.05566	0.162732	8			0.433432	28.0805	53.8551	18.0644	0.466417
WLPS-5	35.5994	106.017	8.65786	3.19924	0	6.31448	38.9919	3.31395	3.9	0	0	8.0537	27.5688	0	0	0	0	Appraisal of branched glycerol dialkyl glycerol tetraether-based indices for North China	0.485728	-0.665816	0.361496	7.88333			0.786259	11.8571	52.5203	35.6226	0.269816
WLPS-7	35.7858	104.304	8.24911	3.19017	1.63952	3.71509	41.2913	1.47795	6.15306	0	0	4.36311	28.8097	0.163536	0.947457	0	0	Appraisal of branched glycerol dialkyl glycerol tetraether-based indices for North China	0.683838	-0.93841	0.408742	8.01667			0.737068	13.0788	52.6374	34.2838	0.494633
WLPS-13	37.5003	102.876	6.6991	1.14005	0	2.56781	42.9906	0.515036	2.68961	0	0	3.46403	39.9338	0	0	0	0	Appraisal of branched glycerol dialkyl glycerol tetraether-based indices for North China	0.827684	-1.13823	0.748113	8.30667			0.952577	7.83915	48.763	43.3978	0.145431
WLPS-41	40.6231	107.041	10.0803	2.2184	0	1.10794	50.3677	1.34827	5.15041	0	0	1.7674	27.9596	0	0	0	0	Appraisal of branched glycerol dialkyl glycerol tetraether-based indices for North China	0.809112	-1.43522	0.496498	8.61667			0.577496	12.2987	57.9744	29.727	0.180377
WLPS-46	41.4097	109.963	9.66642	2.87334	0.610905	4.97485	44.3074	1.73476	5.77628	0.121175	0.600628	4.50172	23.396	0.443277	0.993294	0	0	Appraisal of branched glycerol dialkyl glycerol tetraether-based indices for North China	0.596997	-0.853959	0.502056	8.10333			0.566081	13.1507	57.5151	29.3343	0.311403
WLPS-47	41.41	109.963	10.5156	2.70185	0.499981	5.40377	45.3705	1.98887	5.36159	0.12502	0.477785	3.71291	22.3304	0.467177	1.04459	0	0	Appraisal of branched glycerol dialkyl glycerol tetraether-based indices for North China	0.582583	-0.870758	0.530686	8.14333			0.512922	13.7174	58.7276	27.555	0.269862
WLPS-49	41.0872	110.047	12.6859	2.98772	1.158	1.95578	53.5981	2.13631	3.75324	0.1907	0.39136	1.93178	18.1413	0.311956	0.75791	0	0	Appraisal of branched glycerol dialkyl glycerol tetraether-based indices for North China	0.671566	-1.26608	0.455978	8.1			0.361326	16.8316	62.0255	21.1429	0.315105
WLPS-50	41.0872	110.047	13.4224	3.05664	0.825783	4.71232	51.7449	1.58305	4.44173	0.143876	0.331605	2.29403	17.4437	0	0	0	0	Appraisal of branched glycerol dialkyl glycerol tetraether-based indices for North China	0.563589	-0.994543	0.592021	8.20667			0.349604	17.3048	62.9575	19.7377	0.272075
WLPS-51	41.0872	110.047	11.6929	2.9266	0.487281	5.3056	47.2298	2.0063	4.76139	0	0	3.81575	21.7743	0	0	0	0	Appraisal of branched glycerol dialkyl glycerol tetraether-based indices for North China	0.552352	-0.878816	0.537308	8.11			0.487102	15.1068	59.3031	25.5901	0.258239
WLPS-52	40.3283	110.068	11.0719	4.40729	0.997582	4.59468	41.053	3.72148	5.49628	0.279784	0.759963	5.13343	20.8664	0.537599	1.08056	0	0	Appraisal of branched glycerol dialkyl glycerol tetraether-based indices for North China	0.528605	-0.803798	0.284951	7.82			0.569576	16.4768	55.9052	27.618	0.388573
WLPS-53	40.3283	110.068	9.54768	3.49822	0.700889	7.16725	39.714	2.77659	5.60837	0	0	5.37073	23.8658	0.680382	1.07009	0	0	Appraisal of branched glycerol dialkyl glycerol tetraether-based indices for North China	0.506898	-0.705092	0.425504	7.83			0.623631	13.7468	55.2662	30.987	0.356447
WLPS-54	40.3283	110.068	8.06451	2.82581	0	5.85351	38.0658	2.44684	7.62067	0	0	5.20661	29.9162	0	0	0	0	Appraisal of branched glycerol dialkyl glycerol tetraether-based indices for North China	0.596945	-0.788635	0.421548	7.93333			0.799712	10.8903	53.9868	35.1228	0.259479
WLPS-56	39.9278	109.982	12.4131	5.97249	1.08941	2.52515	43.5476	5.68881	6.36996	0	0	2.28499	20.1085	0	0	0	0	Appraisal of branched glycerol dialkyl glycerol tetraether-based indices for North China	0.615851	-1.12168	0.107551	8.16333			0.486046	19.475	58.1316	22.3935	0.418554
WLPS-57	39.9275	109.982	13.0686	5.20691	1.05938	2.74737	45.4979	5.17731	4.80336	0	0	1.8733	20.5659	0	0	0	0	Appraisal of branched glycerol dialkyl glycerol tetraether-based indices for North China	0.609179	-1.15526	0.182722	8.01			0.465107	19.3349	58.2259	22.4392	0.378883
WLPS-58	40.2419	109.988	12.5159	4.54075	0.669371	5.13261	45.4761	2.83235	4.45938	0	0	3.09771	21.2758	0	0	0	0	Appraisal of branched glycerol dialkyl glycerol tetraether-based indices for North China	0.539674	-0.909048	0.379057	8.27667			0.481607	17.726	57.9005	24.3735	0.331688
WLPS-59	40.2419	109.986	10.5873	2.75327	0	6.20073	47.2494	1.77153	3.52058	0	0	4.10573	23.8114	0	0	0	0	Appraisal of branched glycerol dialkyl glycerol tetraether-based indices for North China	0.552615	-0.838521	0.5694	8.03667			0.522303	13.3406	58.7423	27.9172	0.206384
WLPS-60	40.2419	109.985	10.8814	2.82374	0	5.33648	48.6742	1.82186	3.60661	0	0	3.1341	23.7216	0	0	0	0	Appraisal of branched glycerol dialkyl glycerol tetraether-based indices for North China	0.594101	-0.9318	0.542953	7.96333			0.49723	13.7052	59.4391	26.8557	0.206035
WLPS-62	39.4644	109.818	12.0321	4.08614	0.615819	2.43636	49.2034	1.87039	4.74712	0	0	1.77563	23.2331	0	0	0	0	Appraisal of branched glycerol dialkyl glycerol tetraether-based indices for North China	0.680282	-1.23547	0.385428	8.22			0.484292	16.734	58.2573	25.0087	0.317782
WLPS-63	39.4644	109.818	12.584	4.49756	0.668467	3.6413	46.9519	1.73555	5.33964	0	0	1.73261	22.849	0	0	0	0	Appraisal of branched glycerol dialkyl glycerol tetraether-based indices for North China	0.625464	-1.11357	0.415489	8.05333			0.485868	17.7501	57.6683	24.5816	0.328703
WLPS-64	38.9356	109.743	11.8952	4.51703	0.482102	7.56061	41.7853	1.67586	6.55135	0	0	4.49724	21.0353	0	0	0	0	Appraisal of branched glycerol dialkyl glycerol tetraether-based indices for North China	0.46483	-0.716832	0.497157	7.51333			0.517419	16.8944	57.5731	25.5325	0.324441
WLPS-65	38.9353	109.743	13.0668	3.20389	0.23647	6.45313	40.8625	1.39841	8.40724	0	0	3.41333	21.616	0.238736	1.10348	0	0	Appraisal of branched glycerol dialkyl glycerol tetraether-based indices for North China	0.498227	-0.80157	0.627503	8.27667			0.528986	16.5071	57.1213	26.3716	0.222742
WLPS-66	38.9353	109.743	12.2131	3.06469	0	7.58167	45.5654	1.88135	4.47089	0	0	3.73318	21.4897	0	0	0	0	Appraisal of branched glycerol dialkyl glycerol tetraether-based indices for North China	0.482879	-0.772783	0.602293	7.82333			0.474587	15.2778	59.4993	25.2229	0.200597
WLPS-67	38.5517	109.658	11.3585	3.77479	0	2.48326	47.6864	2.90211	4.4999	0	0	2.51726	24.7778	0	0	0	0	Appraisal of branched glycerol dialkyl glycerol tetraether-based indices for North China	0.67253	-1.16111	0.316618	7.72333			0.544055	15.1333	57.5716	27.295	0.249436
WLPS-68	38.5517	109.658	13.2669	3.55483	0	8.78163	43.039	3.50598	3.1024	0	0	5.31845	19.4308	0	0	0	0	Appraisal of branched glycerol dialkyl glycerol tetraether-based indices for North China	0.379492	-0.646449	0.494526	7.99667			0.477594	16.8218	58.429	24.7492	0.211323
WLPS-70	38.1825	109.435	13.2673	3.97874	0.816126	2.77763	47.9697	1.92612	3.54209	0	0	1.6896	24.0327	0	0	0	0	Appraisal of branched glycerol dialkyl glycerol tetraether-based indices for North China	0.63405	-1.20731	0.434128	8.30667			0.50687	18.0622	56.2155	25.7223	0.310649
WLPS-72	38.1819	109.435	13.1736	4.65155	0.52568	9.59257	39.4231	1.79604	6.17719	0	0	4.73622	19.924	0	0	0	0	Appraisal of branched glycerol dialkyl glycerol tetraether-based indices for North China	0.380502	-0.61719	0.547893	7.75			0.503108	18.3509	56.9889	24.6602	0.310771
WLPS-73	37.7231	109.148	11.9618	2.27781	0	5.20393	49.4319	2.81229	2.34457	0	0	2.2265	23.7412	0	0	0	0	Appraisal of branched glycerol dialkyl glycerol tetraether-based indices for North China	0.59042	-0.993337	0.527936	8.42			0.475287	14.2396	59.7927	25.9677	0.159963
WLPS-74	37.7231	109.148	11.4943	1.86807	0	1.4748	54.3884	1.53115	2.35138	0	0	1.85219	25.0397	0	0	0	0	Appraisal of branched glycerol dialkyl glycerol tetraether-based indices for North China	0.741758	-1.37792	0.581531	8.39667			0.481387	13.3624	59.7458	26.8918	0.139801
WLPS-75	37.7228	109.148	12.258	3.30028	0	4.10432	49.1976	2.75596	3.91239	0	0	2.71769	21.7538	0	0	0	0	Appraisal of branched glycerol dialkyl glycerol tetraether-based indices for North China	0.593694	-1.01705	0.431641	8.48333			0.45911	15.5583	59.9703	24.4715	0.212124
WLPS-76	37.5003	108.865	12.8877	6.50222	0.624352	2.49545	41.2919	1.62065	7.74242	0	0	2.16493	24.6704	0	0	0	0	Appraisal of branched glycerol dialkyl glycerol tetraether-based indices for North China	0.62693	-1.15088	0.277335	8.27333			0.612857	20.0142	53.1504	26.8354	0.38727
WLPS-77	37.5006	108.866	12.0621	6.12015	0.667173	4.30125	39.0745	5.11932	6.74086	0	0	3.29432	22.6204	0	0	0	0	Appraisal of branched glycerol dialkyl glycerol tetraether-based indices for North China	0.545964	-0.909689	0.163126	8.19667			0.597447	18.8494	55.2359	25.9147	0.395476
WLPS-79	37.0772	108.866	13.5265	6.41988	0.708061	3.8571	43.7689	2.0947	6.98135	0	0	2.77269	19.8708	0	0	0	0	Appraisal of branched glycerol dialkyl glycerol tetraether-based indices for North China	0.548855	-0.982228	0.309978	8.3			0.475444	20.6545	56.702	22.6435	0.379385
WLPS-80	37.0775	109.082	12.4831	5.1291	0	5.7592	44.2416	3.16468	4.97096	0	0	4.10947	20.1419	0	0	0	0	Appraisal of branched glycerol dialkyl glycerol tetraether-based indices for North China	0.491763	-0.814516	0.342327	8.1			0.485018	17.6122	58.1365	24.2513	0.291225
WLPS-82	36.6897	109.416	13.5345	6.24853	0.7382	7.18772	36.5796	3.11371	9.3114	0.232948	0.601221	4.24439	16.405	0.408531	1.39423	0	0	Appraisal of branched glycerol dialkyl glycerol tetraether-based indices for North China	0.415752	-0.666024	0.345056	8.07			0.471798	20.5212	57.0266	22.4521	0.376436
WLPS-83	36.6897	109.416	15.0591	5.61363	0	3.08603	45.8111	1.69155	6.67373	0	0	2.89733	19.1675	0	0	0	0	Appraisal of branched glycerol dialkyl glycerol tetraether-based indices for North China	0.532135	-1.03583	0.395128	8.13333			0.45125	20.6727	57.2625	22.0649	0.271548
WLPS-84	36.69	109.416	13.5165	4.99543	0.501503	9.74803	39.9287	2.93558	6.51289	0	0	5.05175	16.8097	0	0	0	0	Appraisal of branched glycerol dialkyl glycerol tetraether-based indices for North China	0.352463	-0.583621	0.467366	8.04333			0.440074	19.0134	59.1252	21.8614	0.315484
WLPS-85	36.2361	109.377	14.5494	7.25655	0.604818	3.60705	44.5816	2.0224	7.58602	0	0	1.82713	17.9651	0	0	0	0	Appraisal of branched glycerol dialkyl glycerol tetraether-based indices for North China	0.548976	-1.06107	0.291532	8.03			0.410723	22.4108	57.797	19.7922	0.377773
WLPS-86	36.2358	109.377	14.6049	5.44116	0	5.49372	44.1333	1.42445	7.98947	0	0	2.00272	18.9102	0	0	0	0	Appraisal of branched glycerol dialkyl glycerol tetraether-based indices for North China	0.507042	-0.924786	0.466488	8.02667			0.421402	20.0461	59.041	20.9129	0.271433
WLPS-87	36.2361	109.377	13.66	6.54955	0.59394	3.93592	44.5762	1.55508	7.56745	0	0	1.97528	18.0234	0.337576	1.2256	0	0	Appraisal of branched glycerol dialkyl glycerol tetraether-based indices for North China	0.565635	-1.0249	0.336679	8.02333			0.412242	20.8035	57.6346	21.5619	0.37193
WLPS-88	35.7117	109.418	12.696	7.55213	1.10893	7.27076	34.6884	4.51988	9.84172	0.284469	0.435681	4.5066	15.5345	0.349417	1.21149	0	0	Appraisal of branched glycerol dialkyl glycerol tetraether-based indices for North China	0.409408	-0.629854	0.218529	7.98			0.477635	21.3571	57.0409	21.602	0.457458
WLPS-89	35.7117	109.417	11.457	5.8223	0.603951	4.91216	41.8549	2.3334	7.96426	0	0	3.57041	19.9183	0.436578	1.12679	0	0	Appraisal of branched glycerol dialkyl glycerol tetraether-based indices for North China	0.554397	-0.862273	0.302565	8.14333			0.502248	17.8833	57.0647	25.052	0.393116
WLPS-90	35.7086	109.42	16.6704	9.50233	0.818237	6.02469	36.5166	2.52672	8.9012	0.289869	0.555097	3.41964	13.197	0.417748	1.16038	0	0	Appraisal of branched glycerol dialkyl glycerol tetraether-based indices for North China	0.3695	-0.721304	0.275702	8.1			0.3906	26.991	54.8142	18.1948	0.412686
WLPS-91	35.3892	109.133	15.7801	9.64341	2.57099	7.22221	33.5977	3.56454	10.0908	0.236334	0.590658	3.0829	12.1558	0.432844	1.03179	0	0	Appraisal of branched glycerol dialkyl glycerol tetraether-based indices for North China	0.36203	-0.647371	0.240936	7.60333			0.373316	27.9945	55.3022	16.7033	0.528154
WLPS-92	35.3892	109.133	14.5113	11.0249	2.64369	7.99861	29.7811	4.71645	11.9172	0.151385	0.582586	3.71051	11.1875	0.350118	1.42461	0	0	Appraisal of branched glycerol dialkyl glycerol tetraether-based indices for North China	0.341306	-0.543927	0.155332	7.58667			0.394338	28.1799	55.1474	16.6727	0.578863
WLPS-93	34.2408	109.124	14.1701	6.18752	0.889975	6.64715	42.6358	1.15232	9.71017	0	0	2.24137	16.3656	0	0	0	0	Appraisal of branched glycerol dialkyl glycerol tetraether-based indices for North China	0.479785	-0.822033	0.452737	7.81			0.377553	21.2476	60.1455	18.6069	0.374982
WLPS-94	34.2417	109.125	16.1519	9.0942	1.83351	3.03725	42.1037	0.766888	12.0719	0	0	1.70841	13.2322	0	0	0	0	Appraisal of branched glycerol dialkyl glycerol tetraether-based indices for North China	0.520269	-1.06671	0.289132	7.83667			0.330975	27.0797	57.9798	14.9406	0.471247
WLPS-95	34.2394	109.124	16.0725	9.49251	2.47259	4.35516	38.2014	2.21685	11.5797	0.261133	0.658563	2.33533	12.3543	0	0	0	0	Appraisal of branched glycerol dialkyl glycerol tetraether-based indices for North China	0.457461	-0.878312	0.241685	7.75667			0.345179	28.0376	57.2728	14.6896	0.51494
WLPS-96	34.2397	109.124	16.9788	9.32418	2.4618	5.30864	36.8477	2.58174	10.509	0.369614	0.584869	2.21956	11.4607	0.390078	0.963338	0	0	Appraisal of branched glycerol dialkyl glycerol tetraether-based indices for North China	0.40886	-0.807332	0.272297	7.88333			0.324512	28.7647	56.2016	15.0337	0.495321
WLPS-97	34.2389	109.124	15.904	16.5177	2.80522	5.67889	23.8036	4.85709	15.8486	0.315025	0.841967	2.67908	8.48291	0.489171	1.77675	0	0	Appraisal of branched glycerol dialkyl glycerol tetraether-based indices for North China	0.343906	-0.586921	0.00420764	7.80667			0.378597	35.2269	51.3452	13.4279	0.62816
NY-1	33.0333	112.217	20	16	5	3	34	1	11	0	1	1	7	0	0	0	0	Absence of a significant bias towards summer temperature in branched tetraether-based paleothermometer at two soil sites with contrasting temperature seasonality	0.383217	-1.01072	0.131279	7.61			0.216216	41	50	8	0.634146
NY-10	33.0333	112.217	22	16	2	5	34	2	9	0	0	2	7	0	0	0	0	Absence of a significant bias towards summer temperature in branched tetraether-based paleothermometer at two soil sites with contrasting temperature seasonality	0.253605	-0.767686	0.176091	7.64			0.230769	40	50	9	0.5
NY-11	33.0333	112.217	21	17	4	3	33	2	12	0	0	2	6	0	0	0	0	Absence of a significant bias towards summer temperature in branched tetraether-based paleothermometer at two soil sites with contrasting temperature seasonality	0.325389	-0.892095	0.101458	7.66			0.222222	42	50	8	0.595238
NY-12	33.0333	112.217	70	3	0	12	12	0	0	0	0	2	1	0	0	0	0	Absence of a significant bias towards summer temperature in branched tetraether-based paleothermometer at two soil sites with contrasting temperature seasonality	-0.810336	0.0321847	1.43669	6.29			0.125	73	24	3	0.0410959
NY-13	33.0333	112.217	70	3	0	11	12	0	0	0	0	2	1	0	0	0	0	Absence of a significant bias towards summer temperature in branched tetraether-based paleothermometer at two soil sites with contrasting temperature seasonality	-0.805135	0	1.43136	6.32			0.130435	73	23	3	0.0410959
NY-15	33.0333	112.217	65	4	0	16	10	1	1	0	0	2	1	0	0	0	0	Absence of a significant bias towards summer temperature in branched tetraether-based paleothermometer at two soil sites with contrasting temperature seasonality	-0.839897	0.21388	1.20952	6.55			0.115385	69	28	3	0.057971
NY-16	33.0333	112.217	68	5	0	15	9	0	1	0	0	2	1	0	0	0	0	Absence of a significant bias towards summer temperature in branched tetraether-based paleothermometer at two soil sites with contrasting temperature seasonality	-0.888026	0.230449	1.22011	6.37			0.125	73	25	3	0.0684932
NY-17	33.0333	112.217	66	4	0	15	11	0	1	0	0	2	1	0	0	0	0	Absence of a significant bias towards summer temperature in branched tetraether-based paleothermometer at two soil sites with contrasting temperature seasonality	-0.805135	0.151268	1.30643	6.35			0.115385	70	27	3	0.0571429
NY-18	33.0333	112.217	71	3	0	13	10	0	1	0	0	2	1	0	0	0	0	Absence of a significant bias towards summer temperature in branched tetraether-based paleothermometer at two soil sites with contrasting temperature seasonality	-0.855317	0.134699	1.44716	6.03			0.130435	74	24	3	0.0405405
NY-2	33.0333	112.217	54	4	0	13	21	1	2	0	0	2	2	0	0	0	0	Absence of a significant bias towards summer temperature in branched tetraether-based paleothermometer at two soil sites with contrasting temperature seasonality	-0.440909	-0.185637	1.1271	7.01			0.117647	58	37	4	0.0689655
NY-20	33.0333	112.217	64	3	0	15	14	0	1	0	0	2	1	0	0	0	0	Absence of a significant bias towards summer temperature in branched tetraether-based paleothermometer at two soil sites with contrasting temperature seasonality	-0.704365	0.0543577	1.42051	5.86			0.103448	67	30	3	0.0447761
NY-21	33.0333	112.217	19	23	5	2	22	2	15	1	1	2	6	0	0	0	0	Absence of a significant bias towards summer temperature in branched tetraether-based paleothermometer at two soil sites with contrasting temperature seasonality	0.328468	-0.845098	-0.0757207	7.49			0.333333	47	43	8	0.702128
NY-22	33.0333	112.217	19	22	6	3	23	2	15	1	1	2	6	0	0	0	0	Absence of a significant bias towards summer temperature in branched tetraether-based paleothermometer at two soil sites with contrasting temperature seasonality	0.327359	-0.763428	-0.0377886	7.64			0.307692	47	45	8	0.723404
NY-23	33.0333	112.217	18	14	4	5	31	2	11	0	1	3	9	0	0	0	0	Absence of a significant bias towards summer temperature in branched tetraether-based paleothermometer at two soil sites with contrasting temperature seasonality	0.333215	-0.69897	0.157608	7.47			0.333333	36	50	12	0.611111
NY-24	33.0333	112.217	19	17	3	4	33	2	14	0	0	2	7	0	0	0	0	Absence of a significant bias towards summer temperature in branched tetraether-based paleothermometer at two soil sites with contrasting temperature seasonality	0.357935	-0.823909	0.0829742	7.69			0.243243	39	53	9	0.589744
NY-25	33.0333	112.217	23	15	3	4	30	2	13	0	1	2	6	0	0	0	0	Absence of a significant bias towards summer temperature in branched tetraether-based paleothermometer at two soil sites with contrasting temperature seasonality	0.261878	-0.778151	0.200915	7.64			0.235294	41	50	8	0.512195
NY-3	33.0333	112.217	46	5	0	13	25	1	3	0	0	3	4	0	0	0	0	Absence of a significant bias towards summer temperature in branched tetraether-based paleothermometer at two soil sites with contrasting temperature seasonality	-0.287242	-0.258278	0.992701	7.23			0.184211	51	42	7	0.0980392
NY-4	33.0333	112.217	65	3	0	13	15	0	1	0	0	1	1	0	0	0	0	Absence of a significant bias towards summer temperature in branched tetraether-based paleothermometer at two soil sites with contrasting temperature seasonality	-0.667178	-0.0579919	1.41497	6.77			0.0714286	68	29	2	0.0441176
NY-5	33.0333	112.217	70	3	0	11	13	0	0	0	0	2	1	0	0	0	0	Absence of a significant bias towards summer temperature in branched tetraether-based paleothermometer at two soil sites with contrasting temperature seasonality	-0.77295	-0.0321847	1.43136	6.28			0.125	73	24	3	0.0410959
NY-6	33.0333	112.217	26	7	1	5	40	1	7	0	0	2	9	0	0	0	0	Absence of a significant bias towards summer temperature in branched tetraether-based paleothermometer at two soil sites with contrasting temperature seasonality	0.237361	-0.845098	0.588272	7.26			0.244444	34	53	11	0.264706
NY-7	33.0333	112.217	27	13	2	7	29	2	10	0	0	2	7	0	0	0	0	Absence of a significant bias towards summer temperature in branched tetraether-based paleothermometer at two soil sites with contrasting temperature seasonality	0.124939	-0.60206	0.355388	7.42			0.25	42	48	9	0.404762
NY-8	33.0333	112.217	55	11	1	8	16	2	3	0	0	1	3	0	0	0	0	Absence of a significant bias towards summer temperature in branched tetraether-based paleothermometer at two soil sites with contrasting temperature seasonality	-0.444452	-0.324511	0.685397	6.61			0.166667	67	29	4	0.19403
NY-9	33.0333	112.217	23	22	3	3	27	1	11	0	0	1	7	0	0	0	0	Absence of a significant bias towards summer temperature in branched tetraether-based paleothermometer at two soil sites with contrasting temperature seasonality	0.249877	-0.929419	0.0532455	7.63			0.266667	48	42	8	0.583333
NY-26	33.0333	112.217	19	11	3	4	40	1	10	1	1	2	8	0	0	0	0	Absence of a significant bias towards summer temperature in branched tetraether-based paleothermometer at two soil sites with contrasting temperature seasonality	0.394452	-0.90309	0.282547	7.7			0.227273	33	57	10	0.515152
NY-14	33.0333	112.217	67	5	0	10	13	0	2	0	0	1	1	0	0	0	0	Absence of a significant bias towards summer temperature in branched tetraether-based paleothermometer at two soil sites with contrasting temperature seasonality	-0.687975	-0.104735	1.18752	5.78			0.0869565	72	25	2	0.0694444
NY-19	33.0333	112.217	75	1	0	13	7	0	0	0	0	2	1	0	0	0	0	Absence of a significant bias towards summer temperature in branched tetraether-based paleothermometer at two soil sites with contrasting temperature seasonality	-1.05115	0.273001	1.94448	5.27			0.15	76	20	3	0.0131579
KMS-1	24.8333	102.6	59	2	0	21	14	0	0	0	0	2	1	0	0	0	0	Absence of a significant bias towards summer temperature in branched tetraether-based paleothermometer at two soil sites with contrasting temperature seasonality	-0.737723	0.185637	1.60206	6.3			0.0857143	61	35	3	0.0327869
KMS-3	24.8333	102.6	49	7	1	15	21	1	2	0	0	2	3	0	0	0	0	Absence of a significant bias towards summer temperature in branched tetraether-based paleothermometer at two soil sites with contrasting temperature seasonality	-0.38818	-0.149762	0.90309	7.2			0.138889	57	39	5	0.157895
KMS-4	24.8333	102.6	49	7	1	15	20	1	2	0	0	2	3	0	0	0	0	Absence of a significant bias towards summer temperature in branched tetraether-based paleothermometer at two soil sites with contrasting temperature seasonality	-0.404571	-0.131279	0.90309	6.62			0.142857	57	38	5	0.157895
KMS-5	24.8333	102.6	19	7	1	8	30	3	12	0	1	3	14	0	0	0	0	Absence of a significant bias towards summer temperature in branched tetraether-based paleothermometer at two soil sites with contrasting temperature seasonality	0.286307	-0.60206	0.431364	7.57			0.447368	27	54	17	0.333333
KMS-6	24.8333	102.6	17	11	2	6	27	2	18	0	1	3	10	0	0	0	0	Absence of a significant bias towards summer temperature in branched tetraether-based paleothermometer at two soil sites with contrasting temperature seasonality	0.348455	-0.613959	0.247784	7.67			0.393939	30	54	13	0.5
KMS-8	24.8333	102.6	65	5	1	15	9	1	1	0	0	1	1	0	0	0	0	Absence of a significant bias towards summer temperature in branched tetraether-based paleothermometer at two soil sites with contrasting temperature seasonality	-0.829304	0.20412	1.12494	6.74			0.0833333	71	26	2	0.0985915
KMS-9	24.8333	102.6	68	2	0	17	11	0	0	0	0	2	1	0	0	0	0	Absence of a significant bias towards summer temperature in branched tetraether-based paleothermometer at two soil sites with contrasting temperature seasonality	-0.860338	0.199572	1.62839	6.62			0.107143	70	28	3	0.0285714
KMS-10	24.8333	102.6	77	5	2	10	6	0	0	0	0	0	0	0	0	0	0	Absence of a significant bias towards summer temperature in branched tetraether-based paleothermometer at two soil sites with contrasting temperature seasonality	-1.03643	0.221849	1.24055	5.44			0	84	16	0	0.107143
KMS-11	24.8333	102.6	71	1	0	18	7	0	0	0	0	2	1	0	0	0	0	Absence of a significant bias towards summer temperature in branched tetraether-based paleothermometer at two soil sites with contrasting temperature seasonality	-1.05595	0.39794	1.94939	6.57			0.12	72	25	3	0.0138889
KMS-12	24.8333	102.6	71	2	0	12	12	0	0	0	0	1	2	0	0	0	0	Absence of a significant bias towards summer temperature in branched tetraether-based paleothermometer at two soil sites with contrasting temperature seasonality	-0.778151	-0.0321847	1.61805	6.6			0.125	73	24	3	0.0273973
KMS-13	24.8333	102.6	65	3	0	14	15	0	0	0	0	1	2	0	0	0	0	Absence of a significant bias towards summer temperature in branched tetraether-based paleothermometer at two soil sites with contrasting temperature seasonality	-0.672641	-0.0543577	1.42051	6.94			0.103448	68	29	3	0.0441176
KMS-14	24.8333	102.6	48	9	1	15	17	1	3	0	0	2	4	0	0	0	0	Absence of a significant bias towards summer temperature in branched tetraether-based paleothermometer at two soil sites with contrasting temperature seasonality	-0.414973	-0.0917704	0.799341	7.08			0.1875	58	36	6	0.189655
KMS-15	24.8333	102.6	64	3	0	17	11	0	0	0	0	2	2	0	0	0	0	Absence of a significant bias towards summer temperature in branched tetraether-based paleothermometer at two soil sites with contrasting temperature seasonality	-0.805135	0.16481	1.43136	6.9			0.142857	67	28	4	0.0447761
LP-2	24.8333	102.6	22	28	5	5	17	3	14	0	1	3	3	0	0	0	0	Absence of a significant bias towards summer temperature in branched tetraether-based paleothermometer at two soil sites with contrasting temperature seasonality	0.124939	-0.39794	-0.0599979	6.92			0.272727	55	40	6	0.690909
LP-3	24.8333	102.6	42	10	1	15	22	1	3	0	0	2	3	0	0	0	0	Absence of a significant bias towards summer temperature in branched tetraether-based paleothermometer at two soil sites with contrasting temperature seasonality	-0.308454	-0.167491	0.714482	6.98			0.135135	53	41	5	0.226415
LP-4	24.8333	102.6	27	20	4	6	23	2	9	0	0	2	6	0	0	0	0	Absence of a significant bias towards summer temperature in branched tetraether-based paleothermometer at two soil sites with contrasting temperature seasonality	0.0791812	-0.559308	0.176091	7.33			0.275862	51	40	8	0.54902
LP-5	24.8333	102.6	23	21	4	8	19	4	13	0	0	2	4	0	0	0	0	Absence of a significant bias towards summer temperature in branched tetraether-based paleothermometer at two soil sites with contrasting temperature seasonality	0.0835461	-0.361728	0.0934217	6.86			0.222222	48	44	6	0.604167
LP-1	24.8333	102.6	21	29	5	5	16	3	13	0	1	3	2	0	0	0	0	Absence of a significant bias towards summer temperature in branched tetraether-based paleothermometer at two soil sites with contrasting temperature seasonality	0.105804	-0.352183	-0.0901766	6.9			0.238095	55	38	5	0.709091
CB1-1	42.3986	128.084	32	5	1	30	15	2	2	0	0	9	4	0	0	0	0	Distribution of glycerol dialkyl glycerol tetraethers in surface soils along an altitudinal transect at cold and humid Mountain Changbai: Implications for the reconstruction of paleoaltimetry and paleoclimate	-0.508836	0.312311	0.947294	5.54			0.288889	38	49	13	0.184211
CB1-2	42.3986	128.108	39	3	0	38	7	1	0	0	0	10	1	0	0	0	0	Distribution of glycerol dialkyl glycerol tetraethers in surface soils along an altitudinal transect at cold and humid Mountain Changbai: Implications for the reconstruction of paleoaltimetry and paleoclimate	-1.03643	0.778151	1.28443	5.15			0.244444	42	46	11	0.0714286
CB1-3	42.3986	128.108	34	6	1	28	16	2	3	0	0	6	4	0	0	0	0	Distribution of glycerol dialkyl glycerol tetraethers in surface soils along an altitudinal transect at cold and humid Mountain Changbai: Implications for the reconstruction of paleoaltimetry and paleoclimate	-0.452298	0.230449	0.889302	5.49			0.227273	41	49	10	0.195122
CB2-1	42.3311	128.11	32	4	1	40	8	1	1	0	0	11	2	0	0	0	0	Distribution of glycerol dialkyl glycerol tetraethers in surface soils along an altitudinal transect at cold and humid Mountain Changbai: Implications for the reconstruction of paleoaltimetry and paleoclimate	-0.839897	0.70757	1.15836	5.3			0.270833	37	50	13	0.162162
CB2-2	42.3314	128.109	31	3	0	43	7	1	1	0	0	13	1	0	0	0	0	Distribution of glycerol dialkyl glycerol tetraethers in surface soils along an altitudinal transect at cold and humid Mountain Changbai: Implications for the reconstruction of paleoaltimetry and paleoclimate	-0.985277	0.845098	1.26717	5.25			0.28	34	52	14	0.0882353
CB2-3	42.3311	128.109	55	3	0	32	4	0	0	0	0	4	1	0	0	0	0	Distribution of glycerol dialkyl glycerol tetraethers in surface soils along an altitudinal transect at cold and humid Mountain Changbai: Implications for the reconstruction of paleoaltimetry and paleoclimate	-1.26007	0.857332	1.4624	4.61			0.138889	58	36	5	0.0517241
CB3-1	42.2528	128.163	45	5	0	27	12	1	2	0	0	4	2	0	0	0	0	Distribution of glycerol dialkyl glycerol tetraethers in surface soils along an altitudinal transect at cold and humid Mountain Changbai: Implications for the reconstruction of paleoaltimetry and paleoclimate	-0.676694	0.345234	1.07918	5.09			0.153846	50	42	6	0.1
CB3-2	42.2525	128.163	33	6	1	27	16	3	4	1	0	6	4	0	0	0	0	Distribution of glycerol dialkyl glycerol tetraethers in surface soils along an altitudinal transect at cold and humid Mountain Changbai: Implications for the reconstruction of paleoaltimetry and paleoclimate	-0.421604	0.217484	0.823909	6.05			0.232558	40	51	10	0.2
CB3-3	42.2525	128.163	42	4	0	29	13	1	2	0	0	5	3	0	0	0	0	Distribution of glycerol dialkyl glycerol tetraethers in surface soils along an altitudinal transect at cold and humid Mountain Changbai: Implications for the reconstruction of paleoaltimetry and paleoclimate	-0.625541	0.327359	1.15229	5.68			0.190476	46	45	8	0.0869565
CB4-1	42.18	128.184	32	5	0	28	19	2	3	0	0	7	4	0	0	0	0	Distribution of glycerol dialkyl glycerol tetraethers in surface soils along an altitudinal transect at cold and humid Mountain Changbai: Implications for the reconstruction of paleoaltimetry and paleoclimate	-0.411101	0.18234	0.933053	5.96			0.234043	37	52	11	0.135135
CB4-2	42.18	128.184	37	4	1	32	12	1	2	0	0	7	2	0	0	0	0	Distribution of glycerol dialkyl glycerol tetraethers in surface soils along an altitudinal transect at cold and humid Mountain Changbai: Implications for the reconstruction of paleoaltimetry and paleoclimate	-0.650365	0.444937	1.13988	5.47			0.204545	42	47	9	0.142857
CB4-3	42.18	128.184	33	5	1	30	15	2	2	0	0	8	3	0	0	0	0	Distribution of glycerol dialkyl glycerol tetraethers in surface soils along an altitudinal transect at cold and humid Mountain Changbai: Implications for the reconstruction of paleoaltimetry and paleoclimate	-0.529039	0.324511	0.954243	5.7			0.244444	39	49	11	0.179487
CB5-1	42.1431	128.193	52	3	0	35	3	0	0	0	0	5	0	0	0	0	0	Distribution of glycerol dialkyl glycerol tetraethers in surface soils along an altitudinal transect at cold and humid Mountain Changbai: Implications for the reconstruction of paleoaltimetry and paleoclimate	-1.48667	1.12494	1.4624	4.96			0.131579	55	38	5	0.0545455
CB5-2	42.1428	128.193	43	3	0	31	11	1	1	0	0	8	2	0	0	0	0	Distribution of glycerol dialkyl glycerol tetraethers in surface soils along an altitudinal transect at cold and humid Mountain Changbai: Implications for the reconstruction of paleoaltimetry and paleoclimate	-0.767686	0.477121	1.26717	5.46			0.238095	46	44	10	0.0652174
CB5-3	42.1431	128.193	58	3	0	29	5	0	1	0	0	4	0	0	0	0	0	Distribution of glycerol dialkyl glycerol tetraethers in surface soils along an altitudinal transect at cold and humid Mountain Changbai: Implications for the reconstruction of paleoaltimetry and paleoclimate	-1.18089	0.819544	1.4624	4.55			0.117647	61	35	4	0.0491803
CB6-1	42.1089	128.218	51	1	0	37	4	0	1	0	0	5	1	0	0	0	0	Distribution of glycerol dialkyl glycerol tetraethers in surface soils along an altitudinal transect at cold and humid Mountain Changbai: Implications for the reconstruction of paleoaltimetry and paleoclimate	-1.19033	0.924279	1.94448	4.67			0.146341	52	42	6	0.0192308
CB6-2	42.1086	128.218	44	3	0	36	8	0	1	0	0	7	1	0	0	0	0	Distribution of glycerol dialkyl glycerol tetraethers in surface soils along an altitudinal transect at cold and humid Mountain Changbai: Implications for the reconstruction of paleoaltimetry and paleoclimate	-0.939519	0.679226	1.42597	4.87			0.181818	47	45	8	0.0638298
CB6-3	42.1086	128.218	56	2	0	33	4	0	0	0	0	5	0	0	0	0	0	Distribution of glycerol dialkyl glycerol tetraethers in surface soils along an altitudinal transect at cold and humid Mountain Changbai: Implications for the reconstruction of paleoaltimetry and paleoclimate	-1.37107	0.977724	1.64836	4.52			0.135135	58	37	5	0.0344828
CB7-1	42.5008	128.134	25	9	0	20	22	4	6	0	0	5	7	0	0	0	0	Distribution of glycerol dialkyl glycerol tetraethers in surface soils along an altitudinal transect at cold and humid Mountain Changbai: Implications for the reconstruction of paleoaltimetry and paleoclimate	-0.154902	-0.064458	0.539269	5.87			0.285714	34	52	12	0.264706
CB7-2	42.5014	128.134	30	7	0	19	25	3	5	0	0	4	6	0	0	0	0	Distribution of glycerol dialkyl glycerol tetraethers in surface soils along an altitudinal transect at cold and humid Mountain Changbai: Implications for the reconstruction of paleoaltimetry and paleoclimate	-0.167973	-0.129634	0.690196	6.13			0.227273	37	52	10	0.189189
CB7-3	42.5014	128.134	19	9	0	15	26	5	9	0	0	5	10	0	0	0	0	Distribution of glycerol dialkyl glycerol tetraethers in surface soils along an altitudinal transect at cold and humid Mountain Changbai: Implications for the reconstruction of paleoaltimetry and paleoclimate	0.0621479	-0.255273	0.385351	6.43			0.365854	28	55	15	0.321429
CB8-1	42.1192	128.106	52	2	0	33	5	0	1	0	0	6	0	0	0	0	0	Distribution of glycerol dialkyl glycerol tetraethers in surface soils along an altitudinal transect at cold and humid Mountain Changbai: Implications for the reconstruction of paleoaltimetry and paleoclimate	-1.18089	0.892095	1.62839	4.4			0.157895	54	39	6	0.037037
CB9-1	42.0611	128.067	37	2	0	42	0	0	0	0	0	17	0	0	0	0	0	Distribution of glycerol dialkyl glycerol tetraethers in surface soils along an altitudinal transect at cold and humid Mountain Changbai: Implications for the reconstruction of paleoaltimetry and paleoclimate			1.5966	4.68			0.404762	39	42	17	0.0512821
CB9-2	42.0611	128.067	38	2	0	40	4	0	0	0	0	14	2	0	0	0	0	Distribution of glycerol dialkyl glycerol tetraethers in surface soils along an altitudinal transect at cold and humid Mountain Changbai: Implications for the reconstruction of paleoaltimetry and paleoclimate	-1.18564	0.954243	1.59106	4.71			0.363636	40	44	16	0.05
CB10-1	42.4017	128.094	40	5	2	30	10	2	1	0	0	6	1	0	0	2	1	Distribution of glycerol dialkyl glycerol tetraethers in surface soils along an altitudinal transect at cold and humid Mountain Changbai: Implications for the reconstruction of paleoaltimetry and paleoclimate	-0.704722	0.51491	1	4.99			0.175	47	43	10	0.191489
CB10-2	42.4017	128.094	41	5	1	31	11	1	1	0	0	6	1	0	0	0	0	Distribution of glycerol dialkyl glycerol tetraethers in surface soils along an altitudinal transect at cold and humid Mountain Changbai: Implications for the reconstruction of paleoaltimetry and paleoclimate	-0.745967	0.48902	1.07918	5.03			0.166667	47	44	7	0.148936
CB11-1	42.0747	128.065	33	2	0	50	5	0	0	0	0	8	0	0	0	0	0	Distribution of glycerol dialkyl glycerol tetraethers in surface soils along an altitudinal transect at cold and humid Mountain Changbai: Implications for the reconstruction of paleoaltimetry and paleoclimate	-1.26007	1.06446	1.61805	4.75			0.145455	35	55	8	0.0571429
CB11-2	42.0747	128.065	40	2	0	39	5	0	1	0	0	11	1	0	0	0	0	Distribution of glycerol dialkyl glycerol tetraethers in surface soils along an altitudinal transect at cold and humid Mountain Changbai: Implications for the reconstruction of paleoaltimetry and paleoclimate	-1.10914	0.920819	1.5966	4.73			0.272727	42	45	12	0.047619
CB12-1	42.1686	128.157	50	3	1	33	6	0	0	0	0	7	0	0	0	0	0	Distribution of glycerol dialkyl glycerol tetraethers in surface soils along an altitudinal transect at cold and humid Mountain Changbai: Implications for the reconstruction of paleoaltimetry and paleoclimate	-1.10914	0.823909	1.44196	4.71			0.179487	54	39	7	0.0925926
TLF-01	42.9153	89.2172	13	4	0	2	55	1	9	0	0	9	5	0	1	0	0	Distribution of glycerol ethers in Turpan soils: implications for use of GDGT-based proxies in hot and dry regions	0.464887	-0.736759	0.477121	7.81			0.245614	17	67	15	0.235294
TLF-02	42.8906	89.2475	8	4	1	1	54	1	12	0	0	9	8	2	0	0	0	Distribution of glycerol ethers in Turpan soils: implications for use of GDGT-based proxies in hot and dry regions	0.619789	-0.792392	0.255273	7.99			0.309091	13	68	19	0.461538
TLF-03	42.8906	89.2475	7	4	1	2	48	1	10	0	1	1	24	1	1	0	0	Distribution of glycerol ethers in Turpan soils: implications for use of GDGT-based proxies in hot and dry regions	0.929419	-1.38021	0.255273	8.18			0.5	12	62	27	0.5
TLF-04	42.6917	89.2553	10	8	2	9	29	4	11	1	2	6	15	1	2	0	0	Distribution of glycerol ethers in Turpan soils: implications for use of GDGT-based proxies in hot and dry regions	0.38739	-0.467361	0.199572	8.04			0.552632	20	56	24	0.6
TLF-07	42.9178	89.5097	10	7	1	8	36	4	10	1	1	4	14	1	2	0	0	Distribution of glycerol ethers in Turpan soils: implications for use of GDGT-based proxies in hot and dry regions	0.463757	-0.619789	0.21388	8.01			0.409091	18	60	21	0.5
TLF-08	42.9178	89.5097	12	7	0	8	41	4	10	0	0	2	17	0	0	0	0	Distribution of glycerol ethers in Turpan soils: implications for use of GDGT-based proxies in hot and dry regions	0.490086	-0.763428	0.259637	7.96			0.387755	19	63	19	0.368421
TLF-09	42.9764	89.2256	12	10	1	3	38	3	15	0	1	2	12	1	2	0	0	Distribution of glycerol ethers in Turpan soils: implications for use of GDGT-based proxies in hot and dry regions	0.6084	-1	0.0621479	7.74			0.341463	23	60	17	0.521739
TLF-10	42.9764	89.2256	13	12	3	4	32	5	16	1	1	3	9	1	1	0	0	Distribution of glycerol ethers in Turpan soils: implications for use of GDGT-based proxies in hot and dry regions	0.491362	-0.767686	0	7.58			0.333333	28	59	14	0.642857
TLF-11	42.9764	89.2256	13	10	1	3	39	3	15	0	1	2	11	1	2	0	0	Distribution of glycerol ethers in Turpan soils: implications for use of GDGT-based proxies in hot and dry regions	0.583577	-1	0.0901766	7.61			0.309524	24	61	16	0.5
TLF-12	42.9792	89.1275	14	11	2	4	37	2	15	0	1	2	11	0	2	0	0	Distribution of glycerol ethers in Turpan soils: implications for use of GDGT-based proxies in hot and dry regions	0.531479	-0.90309	0.141329	7.81			0.317073	27	59	15	0.555556
TLF-13	42.9792	89.1275	16	14	2	4	32	2	15	0	1	2	11	1	2	0	0	Distribution of glycerol ethers in Turpan soils: implications for use of GDGT-based proxies in hot and dry regions	0.456918	-0.855317	0.09691	7.87			0.361111	32	54	16	0.5625
TLF-14	42.9792	89.1275	15	12	2	4	32	2	16	0	1	2	11	2	2	0	0	Distribution of glycerol ethers in Turpan soils: implications for use of GDGT-based proxies in hot and dry regions	0.483961	-0.855317	0.132626	7.84			0.361111	29	55	17	0.551724
TLF-15	42.9458	89.0692	11	6	1	4	41	2	15	0	1	2	17	0	2	0	0	Distribution of glycerol ethers in Turpan soils: implications for use of GDGT-based proxies in hot and dry regions	0.656042	-0.985277	0.273001	7.88			0.422222	18	63	21	0.444444
TLF-16	42.9458	89.0692	9	6	1	2	44	1	15	0	1	1	19	0	2	0	0	Distribution of glycerol ethers in Turpan soils: implications for use of GDGT-based proxies in hot and dry regions	0.834633	-1.32222	0.196295	7.92			0.434783	16	63	22	0.5
TLF-18	42.9444	89.0758	10	8	2	3	55	3	14	0	1	1	1	1	1	0	0	Distribution of glycerol ethers in Turpan soils: implications for use of GDGT-based proxies in hot and dry regions	0.723104	-1.14613	0.0725507	7.98			0.0344828	20	76	4	0.6
TLF-19	42.9444	89.0758	9	6	10	2	42	2	12	0	1	1	13	1	1	0	0	Distribution of glycerol ethers in Turpan soils: implications for use of GDGT-based proxies in hot and dry regions	0.818446	-1.26324	0.138303	7.86			0.318182	25	59	16	1.04
TLF-20	42.9444	89.0758	11	8	2	3	43	3	12	0	1	1	12	0	2	0	0	Distribution of glycerol ethers in Turpan soils: implications for use of GDGT-based proxies in hot and dry regions	0.681241	-1.1383	0.104735	7.51			0.282609	21	62	15	0.571429
TLF-21	42.9547	89.1853	14	5	0	3	51	1	7	0	0	0	19	0	0	0	0	Distribution of glycerol ethers in Turpan soils: implications for use of GDGT-based proxies in hot and dry regions	0.656042	-1.36798	0.452298	7.17			0.351852	19	62	19	0.263158
TLF-22	42.9547	89.1853	7	2	0	1	56	0	7	0	0	1	24	1	0	0	0	Distribution of glycerol ethers in Turpan soils: implications for use of GDGT-based proxies in hot and dry regions	0.985277	-1.60206	0.60206	7.59			0.438596	9	64	26	0.222222
1	26.8	119.1	80	3	1.4	12.3	2	0.3	0.1	0.2	0	0.8	0.1	0	0	0	0	Distributions of soil branched glycerol dialkyl glycerol tetraethers from different climate regions of China	-1.41265	0.795052	1.44669	5.3			0.0629371	84.4	14.9	0.9	0.0687204
2	28.4	119.3	69.1	6.1	1.5	16	4.2	0.7	0.4	0.3	0	1.4	0.2	0	0	0	0	Distributions of soil branched glycerol dialkyl glycerol tetraethers from different climate regions of China	-1.13768	0.597097	1.09742	5.6			0.0792079	76.7	21.6	1.6	0.118644
3	26.1	104.8	52.2	2.8	5.3	29.6	3.3	1.5	0.6	1.9	0	2.6	0.1	0.1	0	0.1	0	Distributions of soil branched glycerol dialkyl glycerol tetraethers from different climate regions of China	-0.957859	0.976377	1.27928	5.4			0.0820669	60.3	36.9	2.9	0.222222
4	27.7	119.6	66.5	3.2	1.2	22.7	2.1	0.7	0.3	0.4	0	3	0.1	0	0	0	0	Distributions of soil branched glycerol dialkyl glycerol tetraethers from different climate regions of China	-1.39653	1.06751	1.3593	5.2			0.125	70.9	26.2	3.1	0.0789845
5	26.5	114.1	54.4	4.1	1.2	25.8	5.8	1.4	0.9	0.6	0	5.1	0.7	0	0	0	0	Distributions of soil branched glycerol dialkyl glycerol tetraethers from different climate regions of China	-0.996451	0.677045	1.16381	5.7			0.183544	59.7	34.5	5.8	0.108878
6	26.3	106.2	76.4	2.5	3	14.4	1.6	0.5	0.2	0.5	0	0.9	0	0	0	0	0	Distributions of soil branched glycerol dialkyl glycerol tetraethers from different climate regions of China	-1.28113	0.980571	1.48096	5			0.05625	81.9	17.2	0.9	0.103785
7	26.6	114.1	42.9	10.3	1.7	22.9	10.4	4	2.2	0.5	0.1	3.4	1.3	0.2	0	0	0	Distributions of soil branched glycerol dialkyl glycerol tetraethers from different climate regions of China	-0.644206	0.35177	0.66289	6.9			0.141141	54.9	40.1	4.9	0.249545
8	29.5	120.5	58	3.1	1	26.3	4	1	0.5	0.6	0	5	0.3	0	0	0	0	Distributions of soil branched glycerol dialkyl glycerol tetraethers from different climate regions of China	-1.18742	0.862076	1.31304	5.2			0.174917	62.1	32.4	5.3	0.0821256
9	26.4	108.2	45.7	3	0.8	31.4	7.2	1.3	0.4	0.4	0	8.4	1.2	0.1	0	0.1	0	Distributions of soil branched glycerol dialkyl glycerol tetraethers from different climate regions of China	-0.949695	0.675604	1.25359	5.8			0.248705	49.5	40.7	9.8	0.0929293
10	28.4	114.1	64.5	4.7	1	23.1	2.7	0.7	0.2	0.3	0	2.6	0.1	0	0	0	0	Distributions of soil branched glycerol dialkyl glycerol tetraethers from different climate regions of China	-1.35315	0.962775	1.21011	5.7			0.104651	70.2	27	2.7	0.0954416
11	26.5	114.2	58.1	8.4	1.6	21.2	5.5	1.7	0.7	0.3	0	2.1	0.3	0	0	0	0	Distributions of soil branched glycerol dialkyl glycerol tetraethers from different climate regions of China	-1.00214	0.603928	0.894952	5.8			0.0898876	68.1	29.4	2.4	0.170338
12	26.1	110.4	58.4	3.7	8.7	23.9	2	0.6	0.3	0.6	0	1.7	0	0	0	0	0	Distributions of soil branched glycerol dialkyl glycerol tetraethers from different climate regions of China	-0.882887	1.10721	1.28193	5.2			0.0656371	70.8	27.4	1.7	0.298023
13	27	118.9	57.3	2.3	0.2	28.5	4.4	0.6	0.4	0.1	0	5.8	0.3	0	0	0	0	Distributions of soil branched glycerol dialkyl glycerol tetraethers from different climate regions of China	-1.23762	0.863196	1.47109	5.2			0.18541	59.8	34	6.1	0.0451505
14	24.5	112.6	50.4	9.9	1.4	16.3	15.5	2.3	2.2	0.2	0	1.3	0.3	0.2	0	0.1	0	Distributions of soil branched glycerol dialkyl glycerol tetraethers from different climate regions of China	-0.544707	0.0468556	0.737766	6.9			0.0503145	61.7	36.5	1.9	0.205835
15	24.7	117.1	68.6	6.5	1	13.7	7.7	0.8	0.3	0.2	0	0.8	0.4	0	0	0	0	Distributions of soil branched glycerol dialkyl glycerol tetraethers from different climate regions of China	-0.946473	0.252883	1.05208	6			0.0560748	76.1	22.7	1.2	0.111695
16	26.6	116.1	57.9	12.4	1.7	15.8	6.6	2.4	0.9	0.3	0	1.5	0.3	0.1	0	0	0	Distributions of soil branched glycerol dialkyl glycerol tetraethers from different climate regions of China	-0.898494	0.399197	0.697206	6.6			0.0803571	72	26	1.9	0.219444
17	26.1	104.8	67.1	1.5	0.3	24.5	2.7	0.4	0.2	0.2	0	3	0.1	0	0	0	0	Distributions of soil branched glycerol dialkyl glycerol tetraethers from different climate regions of China	-1.45738	0.992175	1.68314	4.8			0.113971	68.9	28	3.1	0.030479
18	26.1	104.8	55.1	8.5	1.4	18	10.6	1.2	1.8	0.2	0.2	1.9	1.1	0	0	0	0	Distributions of soil branched glycerol dialkyl glycerol tetraethers from different climate regions of China	-0.696084	0.230667	0.877146	6.7			0.104895	65	32	3	0.173846
19	26.1	104.8	75.1	3.7	2.3	14.6	1.5	0.6	0.3	0.8	0	0.6	0.2	0.1	0	0.3	0	Distributions of soil branched glycerol dialkyl glycerol tetraethers from different climate regions of China	-1.32222	0.951395	1.31932	5.2			0.0496894	81.1	17.8	1.2	0.102343
20	27.2	116.9	64.5	8	1.9	15	6	1.5	0.7	0.4	0	1.4	0.5	0	0	0	0	Distributions of soil branched glycerol dialkyl glycerol tetraethers from different climate regions of China	-0.948907	0.40193	0.922644	6.3			0.0904762	74.4	23.6	1.9	0.158602
21	26.5	114.1	66.4	4.7	2	21.5	1.6	0.8	0.1	0.3	0	2.6	0.1	0	0	0	0	Distributions of soil branched glycerol dialkyl glycerol tetraethers from different climate regions of China	-1.37686	1.15157	1.20363	5.2			0.116883	73.1	24.3	2.7	0.119015
22	27.9	108.7	63.6	3.9	0.9	20.7	7.5	0.4	0.8	0.1	0	1.6	0.6	0	0	0	0	Distributions of soil branched glycerol dialkyl glycerol tetraethers from different climate regions of China	-0.942767	0.43982	1.29236	5.4			0.0780142	68.4	29.5	2.2	0.0833333
23	27.9	108.7	74.7	4.1	0.9	13.9	4.7	0.2	0.3	0	0	1	0.3	0	0	0	0	Distributions of soil branched glycerol dialkyl glycerol tetraethers from different climate regions of China	-1.15992	0.474216	1.31397	5.4			0.0698925	79.7	19.1	1.3	0.0740276
24	27.9	108.7	78.5	0.9	0.2	15.6	3.4	0.1	0.1	0	0	1.1	0.1	0	0	0.1	0	Distributions of soil branched glycerol dialkyl glycerol tetraethers from different climate regions of China	-1.39885	0.678648	1.97359	5.1			0.0631579	79.6	19.2	1.3	0.0163317
25	27.9	108.7	69.8	2	0.4	14.1	10.5	0.3	0.7	0.1	0	1.1	0.9	0	0	0.1	0	Distributions of soil branched glycerol dialkyl glycerol tetraethers from different climate regions of China	-0.832509	0.124939	1.56203	5.6			0.0813008	72.2	25.7	2.1	0.0387812
26	27.9	108.7	78	0.8	0.5	15.9	3.1	0.1	0.1	0.1	0	1.2	0	0	0	0	0	Distributions of soil branched glycerol dialkyl glycerol tetraethers from different climate regions of China	-1.40998	0.741634	2.01842	5.1			0.0631579	79.3	19.3	1.2	0.0226986
27	27.9	108.7	74.3	1.8	0.1	14.3	6.5	0.1	0.3	0.1	0	1.9	0.5	0	0	0	0	Distributions of soil branched glycerol dialkyl glycerol tetraethers from different climate regions of China	-1.08742	0.364417	1.66868	5.4			0.115385	76.2	21.3	2.4	0.0262467
28	27.9	108.7	85.8	1.4	0.4	9.2	2.3	0.1	0.1	0	0	0.5	0	0	0	0	0	Distributions of soil branched glycerol dialkyl glycerol tetraethers from different climate regions of China	-1.53285	0.625044	1.80163	5			0.0434783	87.6	11.7	0.5	0.0251142
29	27.9	108.7	76.7	3.2	1	15.3	2.2	0.3	0.1	0.2	0	1	0	0	0	0	0	Distributions of soil branched glycerol dialkyl glycerol tetraethers from different climate regions of China	-1.44997	0.869765	1.41972	5.1			0.0571429	80.9	18.1	1	0.0642769
30	27.9	108.7	73	6.7	2.4	8.3	5.4	0.9	1.7	0.2	0.1	0.8	0.4	0	0	0	0	Distributions of soil branched glycerol dialkyl glycerol tetraethers from different climate regions of China	-0.914343	0.195613	1.02928	5.4			0.0875912	82.1	16.6	1.2	0.140073
31	26.4	108.2	81.7	2.1	1.8	10.3	2.2	0.3	0	0.5	0	0.9	0	0.1	0	0.1	0	Distributions of soil branched glycerol dialkyl glycerol tetraethers from different climate regions of China	-1.36596	0.706795	1.58358	5.2			0.072	85.6	13.3	1.1	0.0665888
32	29.5	120.5	67.2	8.7	1.6	13.8	5.4	0.9	0.8	0.3	0	1.1	0.3	0	0	0	0	Distributions of soil branched glycerol dialkyl glycerol tetraethers from different climate regions of China	-1.00586	0.417311	0.926214	5.2			0.0729167	77.5	21.2	1.4	0.153548
33	29.1	107.2	68	4.6	0.8	19.9	3.2	0.5	0.3	0.2	0	2	0.3	0	0	0.1	0	Distributions of soil branched glycerol dialkyl glycerol tetraethers from different climate regions of China	-1.291	0.796376	1.23642	5.4			0.0995671	73.4	24.1	2.4	0.0844687
34	26	104.7	82.2	0.8	0.3	11.8	3.9	0.1	0	0	0	0.8	0.1	0	0	0	0	Distributions of soil branched glycerol dialkyl glycerol tetraethers from different climate regions of China	-1.34334	0.498311	2.01889	5.4			0.0573248	83.3	15.8	0.9	0.0168067
35	28.9	118.1	94.6	0.4	0.7	3.2	0.9	0	0	0	0	0.1	0	0	0	0	0	Distributions of soil branched glycerol dialkyl glycerol tetraethers from different climate regions of China	-1.78666	0.564271	2.38828	5			0.0243902	95.7	4.1	0.1	0.0188088
36	27.8	117.8	74.7	7.7	0.5	8.7	5.9	0.5	0.7	0.1	0	0.6	0.6	0.1	0	0	0	Distributions of soil branched glycerol dialkyl glycerol tetraethers from different climate regions of China	-1.03779	0.15557	1.00735	5.5			0.0821918	82.9	15.9	1.3	0.104946
37	26.6	107.6	88	0.6	0.3	8.5	2	0	0.1	0	0	0.5	0	0	0	0	0	Distributions of soil branched glycerol dialkyl glycerol tetraethers from different climate regions of China	-1.60656	0.653213	2.20638	5			0.047619	88.9	10.6	0.5	0.0134983
38	26.1	104.8	73.7	6	2.1	12.2	3.8	0.4	0.6	0.1	0	0.9	0.2	0	0	0	0	Distributions of soil branched glycerol dialkyl glycerol tetraethers from different climate regions of China	-1.11244	0.515211	1.12781	5.4			0.06875	81.8	17.1	1.1	0.124694
39	30.2	119.5	90.2	0.9	0.5	7.6	0.3	0.1	0	0	0	0.4	0	0	0	0	0	Distributions of soil branched glycerol dialkyl glycerol tetraethers from different climate regions of China	-2.08902	1.42597	1.99034	4			0.0506329	91.6	8	0.4	0.0207424
40	27.8	110.8	82.7	1.7	0.4	13.1	0.7	0.1	0.1	0	0	0.9	0.1	0	0	0	0	Distributions of soil branched glycerol dialkyl glycerol tetraethers from different climate regions of China	-1.87148	1.24304	1.72609	4.4			0.0724638	84.8	14	1	0.0294811
41	28.4	119.3	83.2	1.6	0.6	13.2	0.3	0.2	0	0.1	0	0.8	0.1	0	0	0	0	Distributions of soil branched glycerol dialkyl glycerol tetraethers from different climate regions of China	-1.98767	1.54407	1.7288	4.1			0.0666667	85.4	13.8	0.9	0.0327869
42	26.5	114	83	1.6	0.8	13	0.6	0.2	0	0.1	0	0.7	0.1	0	0	0	0	Distributions of soil branched glycerol dialkyl glycerol tetraethers from different climate regions of China	-1.80934	1.29162	1.727	4.8			0.0588235	85.4	13.9	0.8	0.0374707
43	30.3	119.4	85.4	0.8	0.2	11.6	0.6	0.1	0	0	0	0.8	0.1	0.1	0	0.2	0	Distributions of soil branched glycerol dialkyl glycerol tetraethers from different climate regions of China	-2.0361	1.24832	2.03253	4.3			0.0737705	86.4	12.3	1.2	0.0138889
44	28.3	119.3	67.7	3	0.6	23.4	1.8	0.5	0.3	0.2	0	2.1	0.5	0	0	0	0	Distributions of soil branched glycerol dialkyl glycerol tetraethers from different climate regions of China	-1.46427	1.04481	1.41545	4.4			0.103175	71.3	26.2	2.6	0.058906
45	26.1	113.9	67.1	2.8	0.9	24.8	1.1	0.6	0.1	0.3	0	1.9	0.3	0	0	0	0	Distributions of soil branched glycerol dialkyl glycerol tetraethers from different climate regions of China	-1.59199	1.28038	1.43184	4.6			0.0849421	70.8	26.9	2.2	0.0649718
46	26.5	114.1	49.4	5.8	2.4	24.9	5.7	1.4	1.5	0.8	0.1	3.8	1.9	0.4	0.5	1.1	0.3	Distributions of soil branched glycerol dialkyl glycerol tetraethers from different climate regions of China	-0.799229	0.577068	1.01366	5.4			0.186275	57.6	34.4	8	0.184028
47	27.6	114.2	69	0.8	0.2	23.5	3.8	0.4	0.2	0.1	0	1.7	0.4	0	0	0	0	Distributions of soil branched glycerol dialkyl glycerol tetraethers from different climate regions of China	-1.31129	0.778151	1.88696	4			0.0769231	70	28	2.1	0.0171429
FJS1	27.8723	108.794	30.54	22.0562	6.35938	6.39537	9.61414	1.759	12.3834	0.80519	2.7567	0.984853	3.77634	0.0747506	1.26231	0.18763	1.04485	Utility of brGDGTs as temperature and precipitation proxies in subtropical China	-0.00836154	-0.258727	0.190588	4.95			0.297397	58.9555	33.7138	7.33073	0.58985
FJS2	27.8911	108.726	81.4442	2.62625	0.659636	13.5056	0.494374	0.197125	0.0226769	0.0992649	0.00165308	0.758289	0.1284	0.0129176	0.00923116	0.0388667	0.00146852	Utility of brGDGTs as temperature and precipitation proxies in subtropical China	-1.86122	1.35991	1.52672	5			0.063335	84.7301	14.3207	0.949173	0.0465658
FJS3	27.8927	108.725	82.5903	0.494568	0.106336	14.8982	0.766874	0.0727552	0.0990117	0.0190126	0.0015614	0.829455	0.102644	0.00873543	0.010554	0	0	Utility of brGDGTs as temperature and precipitation proxies in subtropical China	-1.95641	1.25739	2.23512	4.9			0.0595017	83.1912	15.8574	0.951389	0.00850139
FJS4	27.8931	108.725	79.0216	1.84674	0.321913	15.9548	0.866792	0.189398	0.0408452	0.0792203	0.00878885	1.42371	0.140729	0.0229156	0.0306777	0.0471596	0.00473334	Utility of brGDGTs as temperature and precipitation proxies in subtropical China	-1.83348	1.23676	1.66881	4.8			0.0930018	81.1902	17.1398	1.66992	0.0306757
FJS5	27.8932	108.726	81.6033	1.72771	0.268154	13.6833	1.1296	0.110681	0.0481639	0.0383458	0.00442888	1.19645	0.189895	0	0	0	0	Utility of brGDGTs as temperature and precipitation proxies in subtropical China	-1.76954	1.05219	1.71459	4.8			0.0935901	83.5991	15.0145	1.38634	0.0270819
FJS6	27.8937	108.725	83.4453	1.46017	0.224784	12.6076	0.946491	0.134972	0.0473385	0.0580019	0.0117609	0.818972	0.24462	0	0	0	0	Utility of brGDGTs as temperature and precipitation proxies in subtropical China	-1.81741	1.05201	1.77971	4.7			0.0784703	85.1303	13.8061	1.06359	0.0224331
FJS7	27.894	108.724	87.2427	0.615775	0.151938	10.7369	0.466678	0.0630334	0.00864951	0.0193224	0.00183315	0.61644	0.0767293	0	0	0	0	Utility of brGDGTs as temperature and precipitation proxies in subtropical China	-2.14516	1.32	2.15939	4.7			0.0618703	88.0104	11.2964	0.693169	0.0104493
FJS8	27.8945	108.722	86.7105	0.598792	0.176308	10.8486	0.658014	0.063296	0.0637726	0.0189437	0.00194253	0.734626	0.109141	0.00605211	0.010056	0	0	Utility of brGDGTs as temperature and precipitation proxies in subtropical China	-1.98425	1.17894	2.16835	4.6			0.0733292	87.4856	11.6545	0.859875	0.010875
FJS9	27.8939	108.721	78.6329	1.3056	0.159215	15.9621	2.13814	0.0967344	0.138771	0.029366	0.00417571	1.17871	0.354308	0	0	0	0	Utility of brGDGTs as temperature and precipitation proxies in subtropical China	-1.53493	0.837406	1.82902	4.45			0.0846957	80.0977	18.3693	1.53301	0.0202757
FJS10	27.894	108.719	83.5996	0.875986	0.303938	13.6083	0.434353	0.1091	0.0148404	0.0327941	0.00663082	0.901231	0.113296	0	0	0	0	Utility of brGDGTs as temperature and precipitation proxies in subtropical China	-2.05067	1.42315	1.99423	4.2			0.0722463	84.7795	14.206	1.01453	0.0175026
FJS11	27.8944	108.718	84.4372	1.65112	0.345546	11.6563	0.631348	0.19474	0.0641359	0.0724066	0.00509632	0.72504	0.120199	0.0219096	0.0211378	0.0446076	0.00918673	Utility of brGDGTs as temperature and precipitation proxies in subtropical China	-1.90799	1.21681	1.7165	4.25			0.0687877	86.4339	12.624	0.942081	0.0270982
FJS12	27.8953	108.715	90.1913	0.882355	0.499831	7.5966	0.256246	0.0759272	0.00988761	0.0409186	0.00459622	0.405221	0.0371304	0	0	0	0	Utility of brGDGTs as temperature and precipitation proxies in subtropical China	-2.08484	1.43576	2.00879	4			0.05633	91.5735	7.98418	0.442351	0.020552
FJS13	27.8957	108.713	89.7555	0.76505	0.339205	8.38586	0.211954	0.0518027	0.00564461	0.0175773	0.00110196	0.419057	0.0199835	0.00210142	0.0100669	0.0117112	0.0034105	Utility of brGDGTs as temperature and precipitation proxies in subtropical China	-2.22185	1.57936	2.07971	4.4			0.0510642	90.8597	8.67394	0.466331	0.0158867
FJS14	27.8959	108.711	82.7356	1.71652	0.380021	13.0905	0.685722	0.141436	0.118714	0.0413147	0.00707595	0.901744	0.134648	0.00808222	0.0189234	0.0158195	0.00378972	Utility of brGDGTs as temperature and precipitation proxies in subtropical China	-1.85557	1.23188	1.71245	4.4			0.0752302	84.8322	14.0848	1.08301	0.0291937
FJS15	27.896	108.711	79.1947	2.34029	0.332832	14.3242	1.87217	0.168645	0.21846	0.0505429	0.00566758	1.19415	0.251664	0.00699096	0.0218405	0.0142744	0.00355449	Utility of brGDGTs as temperature and precipitation proxies in subtropical China	-1.54405	0.863724	1.57141	4.4			0.089268	81.8678	16.6397	1.49248	0.0367171
FJS16	27.8959	108.709	83.1559	1.593	0.566993	13.2254	0.327927	0.183239	0.0213766	0.0798414	0.00282552	0.78479	0.0587296	0	0	0	0	Utility of brGDGTs as temperature and precipitation proxies in subtropical China	-1.99724	1.55912	1.73449	4.1			0.0622372	85.3159	13.8406	0.843519	0.0319634
FJS17	27.8977	108.708	82.7902	1.76346	0.66293	12.8657	0.61495	0.216504	0.0501857	0.116004	0.0036075	0.787799	0.0935943	0.00560398	0.013198	0.0130102	0.00320771	Utility of brGDGTs as temperature and precipitation proxies in subtropical China	-1.82541	1.28488	1.68405	4.4			0.0653819	85.2166	13.867	0.916413	0.0362526
FJS18	27.8999	108.708	82.9651	1.58333	0.764636	13.0231	0.593272	0.230131	0.0125768	0.0941503	0.003566	0.657707	0.0724017	0	0	0	0	Utility of brGDGTs as temperature and precipitation proxies in subtropical China	-1.82488	1.31285	1.72371	4.8			0.0536198	85.3131	13.9568	0.730108	0.0364845
FJS19	27.9013	108.707	75.1819	1.90707	0.392416	17.7781	2.1951	0.30109	0.412726	0.172021	0.0117449	1.18349	0.425168	0.00695554	0.0322559	0	0	Utility of brGDGTs as temperature and precipitation proxies in subtropical China	-1.43353	0.859528	1.62427	4.5			0.0805411	77.4814	20.8708	1.64787	0.0347425
FJS20	27.9018	108.707	85.3824	0.837198	0.225274	11.5549	0.587073	0.129057	0.048467	0	0	0.787836	0.113651	0.0788747	0.0247206	0.193607	0.036875	Utility of brGDGTs as temperature and precipitation proxies in subtropical China	-1.97462	1.24587	2.0014	4.3			0.0742454	86.4449	12.3195	1.23556	0.0148967
FJS21	27.9039	108.706	78.8683	1.68424	0.246156	16.111	1.32759	0.313455	0.207595	0.0969659	0.00606629	0.891935	0.22526	0.00634466	0.0151017	0	0	Utility of brGDGTs as temperature and precipitation proxies in subtropical China	-1.67467	1.0394	1.6771	4.6			0.0640645	80.7987	18.0627	1.13864	0.026938
FJS22	27.9052	108.704	67.6566	2.95865	0.626271	23.3763	1.78422	0.472603	0.301429	0.189773	0.014245	2.05743	0.454191	0.0237996	0.0379799	0.0410305	0.00550077	Utility of brGDGTs as temperature and precipitation proxies in subtropical China	-1.46053	1.05547	1.42375	4.4			0.099824	71.2415	26.1386	2.61993	0.0591114
FJS23	27.9064	108.703	65.7764	3.59523	0.62422	23.1105	2.9706	0.524299	0.505537	0.201731	0.0226555	1.94667	0.628995	0.0186587	0.0397634	0.0278002	0.00695555	Utility of brGDGTs as temperature and precipitation proxies in subtropical China	-1.27712	0.842679	1.33399	4.6			0.0987558	69.9958	27.3353	2.66884	0.0691995
FJS24	27.9071	108.702	67.1098	2.79771	0.874821	24.8295	1.08507	0.588921	0.124575	0.315263	0.00736225	1.92219	0.252472	0.0288321	0.0230041	0.0361762	0.00430659	Utility of brGDGTs as temperature and precipitation proxies in subtropical China	-1.59744	1.30104	1.43373	4.6			0.0839168	70.7824	26.9506	2.26698	0.0642441
FJS25	27.9072	108.7	63.3019	4.2538	0.821894	25.6907	2.0308	0.650252	0.150354	0.264223	0.00530747	2.42044	0.290044	0.0315617	0.0341784	0.049842	0.00463994	Utility of brGDGTs as temperature and precipitation proxies in subtropical China	-1.43762	1.08323	1.2588	4.65			0.0977754	68.3776	28.7917	2.83071	0.0862503
FJS26	27.9071	108.716	49.3945	5.7502	2.38768	24.8968	5.69742	1.40992	1.51509	0.809493	0.127661	3.79633	1.91151	0.445012	0.487468	1.1099	0.261067	Utility of brGDGTs as temperature and precipitation proxies in subtropical China	-0.799585	0.576455	1.01602	5.4			0.186566	57.5323	34.4564	8.01128	0.18295
FJS27	27.909	108.697	57.0436	1.20569	0.132124	28.4685	8.72395	0.346701	0.326474	0.0633793	0.00764431	2.45972	1.22227	0	0	0	0	Utility of brGDGTs as temperature and precipitation proxies in subtropical China	-0.926789	0.492696	1.74103	5.65			0.0989985	58.3814	37.9366	3.682	0.0251781
FJS28	27.9088	108.698	68.9654	0.799408	0.183652	23.4926	3.76711	0.354171	0.192438	0.0908485	0.00824669	1.71965	0.426493	0	0	0	0	Utility of brGDGTs as temperature and precipitation proxies in subtropical China	-1.31328	0.779025	1.9039	4			0.0787294	69.9484	27.9054	2.14614	0.0166796
Peat																										Tetramethylated%	Pentamethylated%	Hexamethylated%
Fransne 2008&2010, French Jura	46.8	6.2	58	2	0	35	0	1	0	0	0	5	0	0	0	0	0	Introducing global peat-specific temperature and pH calibrations based on brGDGT bacterial lipids								60	36	5	0.0333333
Fransne 2008&2010, French Jura	46.8	6.2	56	3	0	35	0	1	0	0	0	6	0	0	0	0	0	Introducing global peat-specific temperature and pH calibrations based on brGDGT bacterial lipids								59	36	6	0.0508475
Fransne 2008&2010, French Jura	46.8	6.2	57	2	1	34	0	1	0	0	0	5	0	0	0	0	0	Introducing global peat-specific temperature and pH calibrations based on brGDGT bacterial lipids								60	35	5	0.0666667
Fransne 2008&2010, French Jura	46.8	6.2	57	4	0	33	0	0	0	0	0	5	0	0	0	0	0	Introducing global peat-specific temperature and pH calibrations based on brGDGT bacterial lipids								61	33	5	0.0655738
Fransne 2008&2010, French Jura	46.8	6.2	53	1	0	38	0	1	0	0	0	6	0	0	0	0	0	Introducing global peat-specific temperature and pH calibrations based on brGDGT bacterial lipids								54	39	6	0.0185185
Fransne 2008&2010, French Jura	46.8	6.2	52	2	0	39	0	1	0	0	0	6	0	0	0	0	0	Introducing global peat-specific temperature and pH calibrations based on brGDGT bacterial lipids								54	40	6	0.037037
Fransne 2008&2010, French Jura	46.8	6.2	62	1	0	32	0	0	0	0	0	4	0	0	0	0	0	Introducing global peat-specific temperature and pH calibrations based on brGDGT bacterial lipids								63	32	4	0.015873
Fransne 2008&2010, French Jura	46.8	6.2	60	1	0	33	0	0	0	0	0	4	0	0	0	0	0	Introducing global peat-specific temperature and pH calibrations based on brGDGT bacterial lipids								61	33	4	0.0163934
Fransne 2008&2010, French Jura	46.8	6.2	57	0	0	39	0	0	0	0	0	4	0	0	0	0	0	Introducing global peat-specific temperature and pH calibrations based on brGDGT bacterial lipids								57	39	4	0
Fransne 2008&2010, French Jura	46.8	6.2	55	2	0	36	0	0	0	0	0	6	0	0	0	0	0	Introducing global peat-specific temperature and pH calibrations based on brGDGT bacterial lipids								57	36	6	0.0350877
Fransne 2008&2010, French Jura	46.8	6.2	50	2	1	40	0	0	0	0	0	5	1	1	0	0	0	Introducing global peat-specific temperature and pH calibrations based on brGDGT bacterial lipids								53	40	7	0.0754717
Fransne 2008&2010, French Jura	46.8	6.2	50	2	0	41	0	0	0	0	0	6	0	0	0	0	0	Introducing global peat-specific temperature and pH calibrations based on brGDGT bacterial lipids								52	41	6	0.0384615
Fransne 2008&2010, French Jura	46.8	6.2	46	2	0	43	0	0	0	0	0	6	0	1	1	1	0	Introducing global peat-specific temperature and pH calibrations based on brGDGT bacterial lipids								48	43	9	0.0416667
Fransne 2008&2010, French Jura	46.8	6.2	54	2	0	39	0	0	0	0	0	3	0	0	0	0	0	Introducing global peat-specific temperature and pH calibrations based on brGDGT bacterial lipids								56	39	3	0.0357143
Fransne 2008&2010, French Jura	46.8	6.2	59	3	1	33	0	0	0	0	0	3	0	0	0	0	0	Introducing global peat-specific temperature and pH calibrations based on brGDGT bacterial lipids								63	33	3	0.0793651
Fransne 2008&2010, French Jura	46.8	6.2	61	3	0	31	0	0	0	0	0	4	0	0	0	0	0	Introducing global peat-specific temperature and pH calibrations based on brGDGT bacterial lipids								64	31	4	0.046875
La Guette, Sologne	47.3	2.3	36	4	1	42	0	1	1	0	0	13	0	2	0	0	0	Introducing global peat-specific temperature and pH calibrations based on brGDGT bacterial lipids								41	44	15	0.146341
La Guette, Sologne	47.3	2.3	45	5	1	35	0	1	0	0	0	11	0	0	1	0	0	Introducing global peat-specific temperature and pH calibrations based on brGDGT bacterial lipids								51	36	12	0.137255
La Guette, Sologne	47.3	2.3	57	1	1	34	0	1	0	0	0	7	0	0	0	0	0	Introducing global peat-specific temperature and pH calibrations based on brGDGT bacterial lipids								59	35	7	0.0508475
La Guette, Sologne	47.3	2.3	52	2	2	33	0	1	0	1	0	8	0	0	0	0	0	Introducing global peat-specific temperature and pH calibrations based on brGDGT bacterial lipids								56	35	8	0.107143
Hochrajen	46.6	8	48	0	0	43	0	0	0	0	0	7	0	0	0	0	0	Introducing global peat-specific temperature and pH calibrations based on brGDGT bacterial lipids								48	43	7	0
Hochrajen	46.6	8	57	2	2	34	0	0	0	0	0	4	0	0	0	0	0	Introducing global peat-specific temperature and pH calibrations based on brGDGT bacterial lipids								61	34	4	0.0983607
Praz Rodet	46.6	6.2	64	2	0	30	0	0	0	0	0	3	0	0	0	0	0	Introducing global peat-specific temperature and pH calibrations based on brGDGT bacterial lipids								66	30	3	0.030303
Praz Rodet	46.6	6.2	63	2	1	30	0	0	0	0	0	3	0	0	0	0	0	Introducing global peat-specific temperature and pH calibrations based on brGDGT bacterial lipids								66	30	3	0.0606061
Sortel	46.7	7.4	58	1	1	35	0	0	0	0	0	5	0	0	0	0	0	Introducing global peat-specific temperature and pH calibrations based on brGDGT bacterial lipids								60	35	5	0.05
Sortel	46.7	7.4	45	2	0	39	0	1	0	0	0	12	0	0	0	0	0	Introducing global peat-specific temperature and pH calibrations based on brGDGT bacterial lipids								47	40	12	0.0425532
LÃ¶rmoos	47	7.4	59	1	0	37	0	0	0	0	0	2	0	0	0	0	0	Introducing global peat-specific temperature and pH calibrations based on brGDGT bacterial lipids								60	37	2	0.0166667
LÃ¶rmoos	47	7.4	57	1	0	38	0	0	0	0	0	4	0	0	0	0	0	Introducing global peat-specific temperature and pH calibrations based on brGDGT bacterial lipids								58	38	4	0.0172414
Kyambangunguru	-9.4	33.8	77	2	1	13	5	0	0	0	0	1	1	0	0	0	0	Introducing global peat-specific temperature and pH calibrations based on brGDGT bacterial lipids								80	18	2	0.05
Kyambangunguru	-9.4	33.8	73	2	1	15	6	0	0	0	0	1	1	0	0	0	0	Introducing global peat-specific temperature and pH calibrations based on brGDGT bacterial lipids								76	21	2	0.0526316
Kyambangunguru	-9.4	33.8	68	3	1	14	10	0	1	0	0	2	1	0	0	0	0	Introducing global peat-specific temperature and pH calibrations based on brGDGT bacterial lipids								72	25	3	0.0694444
Kyambangunguru	-9.4	33.8	79	4	1	11	4	0	0	0	0	1	1	0	0	0	0	Introducing global peat-specific temperature and pH calibrations based on brGDGT bacterial lipids								84	15	2	0.0714286
Kojle Lake	54.3	22.9	65	2	2	28	0	1	0	1	0	2	0	0	0	0	0	Introducing global peat-specific temperature and pH calibrations based on brGDGT bacterial lipids								69	30	2	0.0869565
Kojle Lake	54.3	22.9	57	3	1	34	0	1	0	1	0	3	0	0	0	0	0	Introducing global peat-specific temperature and pH calibrations based on brGDGT bacterial lipids								61	36	3	0.0819672
Teici Bog	56.6	26.5	65	2	1	30	0	0	0	0	0	2	0	0	0	0	0	Introducing global peat-specific temperature and pH calibrations based on brGDGT bacterial lipids								68	30	2	0.0588235
Teici Bog	56.6	26.5	58	1	1	37	0	0	0	0	0	3	0	0	0	0	0	Introducing global peat-specific temperature and pH calibrations based on brGDGT bacterial lipids								60	37	3	0.05
Poiana Siol	47.6	24.8	54	1	1	38	0	1	0	0	0	5	0	0	0	0	0	Introducing global peat-specific temperature and pH calibrations based on brGDGT bacterial lipids								56	39	5	0.0535714
Poiana Siol	47.6	24.8	59	1	1	34	0	1	0	0	0	5	0	0	0	0	0	Introducing global peat-specific temperature and pH calibrations based on brGDGT bacterial lipids								61	35	5	0.0491803
Tibetean Plateau	32.8	102.5	34	4	1	46	0	2	0	0	0	11	1	0	0	0	0	Introducing global peat-specific temperature and pH calibrations based on brGDGT bacterial lipids								39	48	12	0.153846
Tibetean Plateau	32.8	102.5	27	4	1	45	6	2	1	0	0	12	2	0	0	0	0	Introducing global peat-specific temperature and pH calibrations based on brGDGT bacterial lipids								32	54	14	0.1875
Tibetean Plateau	32.8	102.5	30	2	0	46	6	1	1	0	0	11	2	0	0	0	0	Introducing global peat-specific temperature and pH calibrations based on brGDGT bacterial lipids								32	54	13	0.0625
Tibetean Plateau	32.8	102.5	32	8	2	36	8	2	1	1	0	8	2	0	0	0	0	Introducing global peat-specific temperature and pH calibrations based on brGDGT bacterial lipids								42	48	10	0.285714
Tibetean Plateau	32.8	102.5	29	3	0	51	0	1	0	0	0	13	2	0	0	0	0	Introducing global peat-specific temperature and pH calibrations based on brGDGT bacterial lipids								32	52	15	0.09375
Tibetean Plateau	32.8	102.5	31	2	0	50	0	1	0	0	0	13	2	0	0	0	0	Introducing global peat-specific temperature and pH calibrations based on brGDGT bacterial lipids								33	51	15	0.0606061
Tibetean Plateau	32.8	102.5	31	2	0	52	0	1	0	0	0	12	1	0	0	0	0	Introducing global peat-specific temperature and pH calibrations based on brGDGT bacterial lipids								33	53	13	0.0606061
Tibetean Plateau	32.8	102.5	25	3	0	44	6	2	1	0	0	16	3	0	0	0	0	Introducing global peat-specific temperature and pH calibrations based on brGDGT bacterial lipids								28	53	19	0.107143
Andorra	-54.7	-68.3	59	6	1	30	0	0	0	0	0	3	0	0	0	0	0	Introducing global peat-specific temperature and pH calibrations based on brGDGT bacterial lipids								66	30	3	0.121212
Andorra	-54.7	-68.3	57	2	0	36	0	0	0	0	0	4	0	0	0	0	0	Introducing global peat-specific temperature and pH calibrations based on brGDGT bacterial lipids								59	36	4	0.0338983
Andorra	-54.7	-68.3	49	2	0	42	0	0	0	0	0	6	0	0	0	0	0	Introducing global peat-specific temperature and pH calibrations based on brGDGT bacterial lipids								51	42	6	0.0392157
Andorra	-54.7	-68.3	45	1	0	46	0	1	0	0	0	5	2	0	0	0	0	Introducing global peat-specific temperature and pH calibrations based on brGDGT bacterial lipids								46	47	7	0.0217391
Andorra	-54.7	-68.3	35	0	0	54	0	1	0	0	0	9	0	0	0	0	0	Introducing global peat-specific temperature and pH calibrations based on brGDGT bacterial lipids								35	55	9	0
Andorra	-54.7	-68.3	39	1	0	50	0	1	0	0	0	6	3	0	0	0	0	Introducing global peat-specific temperature and pH calibrations based on brGDGT bacterial lipids								40	51	9	0.025
Andorra	-54.7	-68.3	37	0	0	28	25	1	0	0	0	9	0	0	0	0	0	Introducing global peat-specific temperature and pH calibrations based on brGDGT bacterial lipids								37	54	9	0
Andorra	-54.7	-68.3	28	0	0	54	0	1	0	0	0	16	0	0	0	0	0	Introducing global peat-specific temperature and pH calibrations based on brGDGT bacterial lipids								28	55	16	0
Andorra	-54.7	-68.3	28	0	0	52	0	1	0	0	0	18	0	0	0	0	0	Introducing global peat-specific temperature and pH calibrations based on brGDGT bacterial lipids								28	53	18	0
Andorra	-54.7	-68.3	29	0	0	55	0	1	0	0	0	15	0	0	0	0	0	Introducing global peat-specific temperature and pH calibrations based on brGDGT bacterial lipids								29	56	15	0
Andorra	-54.7	-68.3	39	1	0	43	0	1	0	0	0	11	5	0	0	0	0	Introducing global peat-specific temperature and pH calibrations based on brGDGT bacterial lipids								40	44	16	0.025
Andorra	-54.7	-68.3	28	1	0	52	0	1	0	0	0	18	0	0	0	0	0	Introducing global peat-specific temperature and pH calibrations based on brGDGT bacterial lipids								29	53	18	0.0344828
Andorra	-54.7	-68.3	31	0	0	52	0	1	0	0	0	15	0	0	0	0	0	Introducing global peat-specific temperature and pH calibrations based on brGDGT bacterial lipids								31	53	15	0
Ballyduff Bog	53.1	-8	54	4	2	34	0	2	0	1	0	4	0	0	0	0	0	Introducing global peat-specific temperature and pH calibrations based on brGDGT bacterial lipids								60	37	4	0.133333
Ballyduff Bog	53.1	-8	51	4	2	35	0	2	0	1	0	4	0	0	0	0	0	Introducing global peat-specific temperature and pH calibrations based on brGDGT bacterial lipids								57	38	4	0.140351
Ballyduff Bog	53.1	-8	52	4	3	35	0	2	0	1	0	4	0	0	0	0	0	Introducing global peat-specific temperature and pH calibrations based on brGDGT bacterial lipids								59	38	4	0.169492
Ballyduff Bog	53.1	-8	51	4	2	36	0	2	0	1	0	4	0	0	0	0	0	Introducing global peat-specific temperature and pH calibrations based on brGDGT bacterial lipids								57	39	4	0.140351
Ballyduff Bog	53.1	-8	52	4	2	36	0	1	0	0	0	4	0	0	0	0	0	Introducing global peat-specific temperature and pH calibrations based on brGDGT bacterial lipids								58	37	4	0.137931
Ballyduff Bog	53.1	-8	55	4	2	33	0	2	0	1	0	4	0	0	0	0	0	Introducing global peat-specific temperature and pH calibrations based on brGDGT bacterial lipids								61	36	4	0.131148
Ballyduff Bog	53.1	-8	53	3	1	35	0	1	0	1	0	6	0	0	0	0	0	Introducing global peat-specific temperature and pH calibrations based on brGDGT bacterial lipids								57	37	6	0.0877193
Ballyduff Bog	53.1	-8	54	4	1	34	0	1	0	1	0	5	0	0	0	0	0	Introducing global peat-specific temperature and pH calibrations based on brGDGT bacterial lipids								59	36	5	0.101695
Ballyduff Bog	53.1	-8	52	5	1	34	0	1	0	1	0	7	0	0	0	0	0	Introducing global peat-specific temperature and pH calibrations based on brGDGT bacterial lipids								58	36	7	0.12069
Ballyduff Bog	53.1	-8	60	1	1	32	0	1	0	0	0	4	1	0	0	0	0	Introducing global peat-specific temperature and pH calibrations based on brGDGT bacterial lipids								62	33	5	0.0483871
Ballyduff Bog	53.1	-8	55	2	1	35	0	1	0	0	0	5	1	0	0	0	0	Introducing global peat-specific temperature and pH calibrations based on brGDGT bacterial lipids								58	36	6	0.0689655
Bissendorfer Moor	52.5	9.7	50	4	2	39	0	1	0	0	0	3	0	0	0	0	0	Introducing global peat-specific temperature and pH calibrations based on brGDGT bacterial lipids								56	40	3	0.142857
Bissendorfer Moor	52.5	9.7	50	4	2	39	0	1	0	1	0	3	0	0	0	0	0	Introducing global peat-specific temperature and pH calibrations based on brGDGT bacterial lipids								56	41	3	0.142857
Bissendorfer Moor	52.5	9.7	51	2	1	39	0	1	0	1	0	4	0	0	0	0	0	Introducing global peat-specific temperature and pH calibrations based on brGDGT bacterial lipids								54	41	4	0.0740741
Bissendorfer Moor	52.5	9.7	58	3	2	33	0	1	0	0	0	3	0	0	0	0	0	Introducing global peat-specific temperature and pH calibrations based on brGDGT bacterial lipids								63	34	3	0.111111
Bissendorfer Moor	52.5	9.7	50	1	0	41	0	1	0	0	0	7	0	0	0	0	0	Introducing global peat-specific temperature and pH calibrations based on brGDGT bacterial lipids								51	42	7	0.0196078
Bissendorfer Moor	52.5	9.7	59	2	1	34	0	1	0	0	0	2	0	0	0	0	0	Introducing global peat-specific temperature and pH calibrations based on brGDGT bacterial lipids								62	35	2	0.0645161
Bissendorfer Moor	52.5	9.7	46	4	2	43	0	2	0	0	0	3	0	0	0	0	0	Introducing global peat-specific temperature and pH calibrations based on brGDGT bacterial lipids								52	45	3	0.153846
Bissendorfer Moor	52.5	9.7	47	5	2	40	0	2	0	1	0	3	0	0	0	0	0	Introducing global peat-specific temperature and pH calibrations based on brGDGT bacterial lipids								54	43	3	0.166667
Kontolanrahka	60.8	22.8	57	2	0	38	0	0	0	0	0	3	0	0	0	0	0	Introducing global peat-specific temperature and pH calibrations based on brGDGT bacterial lipids								59	38	3	0.0338983
Kontolanrahka	60.8	22.8	51	3	1	42	0	0	0	0	0	3	0	0	0	0	0	Introducing global peat-specific temperature and pH calibrations based on brGDGT bacterial lipids								55	42	3	0.0909091
Kontolanrahka	60.8	22.8	63	1	1	33	0	0	0	0	0	3	0	0	0	0	0	Introducing global peat-specific temperature and pH calibrations based on brGDGT bacterial lipids								65	33	3	0.0461538
Kontolanrahka	60.8	22.8	64	1	1	32	0	0	0	0	0	3	0	0	0	0	0	Introducing global peat-specific temperature and pH calibrations based on brGDGT bacterial lipids								66	32	3	0.0454545
Kontolanrahka	60.8	22.8	45	4	1	46	0	0	0	0	0	5	0	0	0	0	0	Introducing global peat-specific temperature and pH calibrations based on brGDGT bacterial lipids								50	46	5	0.12
Butterburn Flow	55.1	-2.5	57	1	2	34	0	1	0	1	0	5	0	0	0	0	0	Introducing global peat-specific temperature and pH calibrations based on brGDGT bacterial lipids								60	36	5	0.0833333
Butterburn Flow	55.1	-2.5	53	2	2	36	0	1	0	1	0	5	0	0	0	0	0	Introducing global peat-specific temperature and pH calibrations based on brGDGT bacterial lipids								57	38	5	0.105263
Butterburn Flow	55.1	-2.5	55	2	1	36	0	1	0	1	0	5	0	0	0	0	0	Introducing global peat-specific temperature and pH calibrations based on brGDGT bacterial lipids								58	38	5	0.0689655
Butterburn Flow	55.1	-2.5	57	2	1	35	0	1	0	0	0	5	0	0	0	0	0	Introducing global peat-specific temperature and pH calibrations based on brGDGT bacterial lipids								60	36	5	0.0666667
Butterburn Flow	55.1	-2.5	62	1	1	31	0	1	0	1	0	3	0	0	0	0	0	Introducing global peat-specific temperature and pH calibrations based on brGDGT bacterial lipids								64	33	3	0.046875
Butterburn Flow	55.1	-2.5	55	2	1	34	0	1	0	1	0	6	0	0	0	0	0	Introducing global peat-specific temperature and pH calibrations based on brGDGT bacterial lipids								58	36	6	0.0689655
Butterburn Flow	55.1	-2.5	52	2	1	37	0	1	0	1	0	6	0	0	0	0	0	Introducing global peat-specific temperature and pH calibrations based on brGDGT bacterial lipids								55	39	6	0.0727273
Aucayacu	-3.9	-74.4	94	1	1	4	0	0	0	0	0	0	0	0	0	0	0	Introducing global peat-specific temperature and pH calibrations based on brGDGT bacterial lipids								96	4	0	0.03125
Aucayacu	-3.9	-74.4	94	1	1	4	0	0	0	0	0	0	0	0	0	0	0	Introducing global peat-specific temperature and pH calibrations based on brGDGT bacterial lipids								96	4	0	0.03125
Aucayacu	-3.9	-74.4	93	1	1	4	0	0	0	0	0	0	0	0	0	0	0	Introducing global peat-specific temperature and pH calibrations based on brGDGT bacterial lipids								95	4	0	0.0315789
Aucayacu	-3.9	-74.4	91	2	2	4	0	0	0	0	0	0	0	0	0	0	0	Introducing global peat-specific temperature and pH calibrations based on brGDGT bacterial lipids								95	4	0	0.0631579
RiÃ±Ã³n	-4.9	-74	91	3	2	3	0	0	0	0	0	1	0	0	0	0	0	Introducing global peat-specific temperature and pH calibrations based on brGDGT bacterial lipids								96	3	1	0.0729167
Mira Flores	-4.4	-74.1	94	1	1	3	0	0	0	0	0	0	0	0	0	0	0	Introducing global peat-specific temperature and pH calibrations based on brGDGT bacterial lipids								96	3	0	0.03125
Mira Flores	-4.4	-74.1	95	1	1	3	1	0	0	0	0	0	0	0	0	0	0	Introducing global peat-specific temperature and pH calibrations based on brGDGT bacterial lipids								97	4	0	0.0309278
Mira Flores	-4.4	-74.1	94	1	1	3	1	0	0	0	0	0	0	0	0	0	0	Introducing global peat-specific temperature and pH calibrations based on brGDGT bacterial lipids								96	4	0	0.03125
Mira Flores	-4.4	-74.1	95	1	1	2	0	0	0	0	0	0	0	0	0	0	0	Introducing global peat-specific temperature and pH calibrations based on brGDGT bacterial lipids								97	2	0	0.0309278
Mira Flores	-4.4	-74.1	96	1	1	3	0	0	0	0	0	0	0	0	0	0	0	Introducing global peat-specific temperature and pH calibrations based on brGDGT bacterial lipids								98	3	0	0.0306122
Mira Flores	-4.4	-74.1	95	2	1	2	0	0	0	0	0	0	0	0	0	0	0	Introducing global peat-specific temperature and pH calibrations based on brGDGT bacterial lipids								98	2	0	0.0408163
Mira Flores	-4.4	-74.1	95	1	1	3	0	0	0	0	0	0	0	0	0	0	0	Introducing global peat-specific temperature and pH calibrations based on brGDGT bacterial lipids								97	3	0	0.0309278
Mira Flores	-4.4	-74.1	93	2	2	4	0	0	0	0	0	0	0	0	0	0	0	Introducing global peat-specific temperature and pH calibrations based on brGDGT bacterial lipids								97	4	0	0.0618557
Mira Flores	-4.4	-74.1	96	1	1	2	0	0	0	0	0	0	0	0	0	0	0	Introducing global peat-specific temperature and pH calibrations based on brGDGT bacterial lipids								98	2	0	0.0306122
Nueva York	-4.4	-74.3	95	1	1	3	0	0	0	0	0	0	0	0	0	0	0	Introducing global peat-specific temperature and pH calibrations based on brGDGT bacterial lipids								97	3	0	0.0309278
Nueva York	-4.4	-74.3	93	1	1	5	0	0	0	0	0	0	0	0	0	0	0	Introducing global peat-specific temperature and pH calibrations based on brGDGT bacterial lipids								95	5	0	0.0315789
Nueva York	-4.4	-74.3	96	1	0	3	0	0	0	0	0	0	0	0	0	0	0	Introducing global peat-specific temperature and pH calibrations based on brGDGT bacterial lipids								97	3	0	0.0103093
Nueva York	-4.4	-74.3	95	1	1	3	0	0	0	0	0	0	0	0	0	0	0	Introducing global peat-specific temperature and pH calibrations based on brGDGT bacterial lipids								97	3	0	0.0309278
Nueva York	-4.4	-74.3	96	1	0	2	0	0	0	0	0	0	0	0	0	0	0	Introducing global peat-specific temperature and pH calibrations based on brGDGT bacterial lipids								97	2	0	0.0103093
Nueva York	-4.4	-74.3	95	1	0	3	0	0	0	0	0	0	0	0	0	0	0	Introducing global peat-specific temperature and pH calibrations based on brGDGT bacterial lipids								96	3	0	0.0104167
Nueva York	-4.4	-74.3	95	1	1	4	0	0	0	0	0	0	0	0	0	0	0	Introducing global peat-specific temperature and pH calibrations based on brGDGT bacterial lipids								97	4	0	0.0309278
Nueva York	-4.4	-74.3	96	1	1	3	0	0	0	0	0	0	0	0	0	0	0	Introducing global peat-specific temperature and pH calibrations based on brGDGT bacterial lipids								98	3	0	0.0306122
SAN JORGE	-4.1	-73.2	93	1	2	3	0	0	0	0	0	0	0	0	0	0	0	Introducing global peat-specific temperature and pH calibrations based on brGDGT bacterial lipids								96	3	0	0.0520833
SAN JORGE	-4.1	-73.2	96	1	1	2	0	0	0	0	0	0	0	0	0	0	0	Introducing global peat-specific temperature and pH calibrations based on brGDGT bacterial lipids								98	2	0	0.0306122
SAN JORGE	-4.1	-73.2	94	1	1	3	0	0	0	0	0	0	0	0	0	0	0	Introducing global peat-specific temperature and pH calibrations based on brGDGT bacterial lipids								96	3	0	0.03125
SAN JORGE	-4.1	-73.2	93	1	1	4	0	0	0	0	0	0	0	0	0	0	0	Introducing global peat-specific temperature and pH calibrations based on brGDGT bacterial lipids								95	4	0	0.0315789
SAN JORGE	-4.1	-73.2	96	1	1	2	0	0	0	0	0	0	0	0	0	0	0	Introducing global peat-specific temperature and pH calibrations based on brGDGT bacterial lipids								98	2	0	0.0306122
SAN JORGE	-4.1	-73.2	95	2	2	1	0	0	0	0	0	0	0	0	0	0	0	Introducing global peat-specific temperature and pH calibrations based on brGDGT bacterial lipids								99	1	0	0.0606061
SAN JORGE	-4.1	-73.2	95	1	2	2	0	0	0	0	0	0	0	0	0	0	0	Introducing global peat-specific temperature and pH calibrations based on brGDGT bacterial lipids								98	2	0	0.0510204
SAN JORGE	-4.1	-73.2	95	1	1	3	0	0	0	0	0	0	0	0	0	0	0	Introducing global peat-specific temperature and pH calibrations based on brGDGT bacterial lipids								97	3	0	0.0309278
SAN JORGE	-4.1	-73.2	95	1	1	3	0	0	0	0	0	0	0	0	0	0	0	Introducing global peat-specific temperature and pH calibrations based on brGDGT bacterial lipids								97	3	0	0.0309278
SAN JORGE	-4.1	-73.2	94	1	2	2	0	0	0	0	0	0	0	0	0	0	0	Introducing global peat-specific temperature and pH calibrations based on brGDGT bacterial lipids								97	2	0	0.0515464
Roca Fuerte	-4.4	-74.8	94	1	2	2	0	0	0	0	0	0	0	0	0	0	0	Introducing global peat-specific temperature and pH calibrations based on brGDGT bacterial lipids								97	2	0	0.0515464
Roca Fuerte	-4.4	-74.8	94	1	2	2	0	0	0	0	0	0	0	0	0	0	0	Introducing global peat-specific temperature and pH calibrations based on brGDGT bacterial lipids								97	2	0	0.0515464
Roca Fuerte	-4.4	-74.8	94	1	2	2	0	0	0	0	0	0	0	0	0	0	0	Introducing global peat-specific temperature and pH calibrations based on brGDGT bacterial lipids								97	2	0	0.0515464
Roca Fuerte	-4.4	-74.8	94	1	0	4	0	0	0	0	0	0	0	0	0	0	0	Introducing global peat-specific temperature and pH calibrations based on brGDGT bacterial lipids								95	4	0	0.0105263
Roca Fuerte	-4.4	-74.8	93	1	1	4	0	0	0	0	0	0	0	0	0	0	0	Introducing global peat-specific temperature and pH calibrations based on brGDGT bacterial lipids								95	4	0	0.0315789
Roca Fuerte	-4.4	-74.8	95	1	1	4	0	0	0	0	0	0	0	0	0	0	0	Introducing global peat-specific temperature and pH calibrations based on brGDGT bacterial lipids								97	4	0	0.0309278
Roca Fuerte	-4.4	-74.8	95	1	0	3	0	0	0	0	0	0	0	0	0	0	0	Introducing global peat-specific temperature and pH calibrations based on brGDGT bacterial lipids								96	3	0	0.0104167
Roca Fuerte	-4.4	-74.8	95	1	1	2	0	0	0	0	0	0	0	0	0	0	0	Introducing global peat-specific temperature and pH calibrations based on brGDGT bacterial lipids								97	2	0	0.0309278
Roca Fuerte	-4.4	-74.8	97	1	1	2	0	0	0	0	0	0	0	0	0	0	0	Introducing global peat-specific temperature and pH calibrations based on brGDGT bacterial lipids								99	2	0	0.030303
Roca Fuerte	-4.4	-74.8	92	1	0	6	0	0	0	0	0	0	0	0	0	0	0	Introducing global peat-specific temperature and pH calibrations based on brGDGT bacterial lipids								93	6	0	0.0107527
Roca Fuerte	-4.4	-74.8	93	1	1	4	0	0	0	0	0	0	0	0	0	0	0	Introducing global peat-specific temperature and pH calibrations based on brGDGT bacterial lipids								95	4	0	0.0315789
Roca Fuerte	-4.4	-74.8	92	1	1	5	0	0	0	0	0	0	0	0	0	0	0	Introducing global peat-specific temperature and pH calibrations based on brGDGT bacterial lipids								94	5	0	0.0319149
Roca Fuerte	-4.4	-74.8	92	2	1	5	0	0	0	0	0	0	0	0	0	0	0	Introducing global peat-specific temperature and pH calibrations based on brGDGT bacterial lipids								95	5	0	0.0421053
Buena Vista del MaquÃ­a	-6.2	-74.7	92	2	1	5	0	0	0	0	0	0	0	0	0	0	0	Introducing global peat-specific temperature and pH calibrations based on brGDGT bacterial lipids								95	5	0	0.0421053
Buena Vista del MaquÃ­a	-6.2	-74.7	94	1	0	4	0	0	0	0	0	0	0	0	0	0	0	Introducing global peat-specific temperature and pH calibrations based on brGDGT bacterial lipids								95	4	0	0.0105263
Buena Vista del MaquÃ­a	-6.2	-74.7	93	2	1	4	0	0	0	0	0	0	0	0	0	0	0	Introducing global peat-specific temperature and pH calibrations based on brGDGT bacterial lipids								96	4	0	0.0416667
Buena Vista del MaquÃ­a	-6.2	-74.7	93	1	1	5	0	0	0	0	0	0	0	0	0	0	0	Introducing global peat-specific temperature and pH calibrations based on brGDGT bacterial lipids								95	5	0	0.0315789
Buena Vista del MaquÃ­a	-6.2	-74.7	93	2	1	4	0	0	0	0	0	0	0	0	0	0	0	Introducing global peat-specific temperature and pH calibrations based on brGDGT bacterial lipids								96	4	0	0.0416667
Buena Vista del MaquÃ­a	-6.2	-74.7	85	4	2	8	0	0	0	0	0	0	0	0	0	0	0	Introducing global peat-specific temperature and pH calibrations based on brGDGT bacterial lipids								91	8	0	0.0879121
Buena Vista del MaquÃ­a	-6.2	-74.7	93	2	1	4	0	0	0	0	0	0	0	0	0	0	0	Introducing global peat-specific temperature and pH calibrations based on brGDGT bacterial lipids								96	4	0	0.0416667
Buena Vista del MaquÃ­a	-6.2	-74.7	87	4	2	7	0	0	0	0	0	0	0	0	0	0	0	Introducing global peat-specific temperature and pH calibrations based on brGDGT bacterial lipids								93	7	0	0.0860215
MaquÃ­a	-6.3	-74.8	86	5	1	4	3	0	0	0	0	0	0	0	0	0	0	Introducing global peat-specific temperature and pH calibrations based on brGDGT bacterial lipids								92	7	0	0.076087
MaquÃ­a	-6.3	-74.8	92	5	1	2	0	0	0	0	0	0	0	0	0	0	0	Introducing global peat-specific temperature and pH calibrations based on brGDGT bacterial lipids								98	2	0	0.0714286
MaquÃ­a	-6.3	-74.8	89	4	1	4	1	0	0	0	0	0	0	0	0	0	0	Introducing global peat-specific temperature and pH calibrations based on brGDGT bacterial lipids								94	5	0	0.0638298
MaquÃ­a	-6.3	-74.8	94	2	0	1	2	0	0	0	0	0	0	0	0	0	0	Introducing global peat-specific temperature and pH calibrations based on brGDGT bacterial lipids								96	3	0	0.0208333
Nueva Alianza	-4.7	-75.4	89	3	1	4	3	0	0	0	0	0	0	0	0	0	0	Introducing global peat-specific temperature and pH calibrations based on brGDGT bacterial lipids								93	7	0	0.0537634
Nueva Alianza	-4.7	-75.4	86	3	1	5	3	0	1	0	0	0	0	0	0	0	0	Introducing global peat-specific temperature and pH calibrations based on brGDGT bacterial lipids								90	9	0	0.0555556
Nueva Alianza	-4.7	-75.4	84	4	1	6	3	0	1	0	0	0	0	0	0	0	0	Introducing global peat-specific temperature and pH calibrations based on brGDGT bacterial lipids								89	10	0	0.0674157
Nueva Alianza	-4.7	-75.4	84	6	1	6	3	0	1	0	0	0	0	0	0	0	0	Introducing global peat-specific temperature and pH calibrations based on brGDGT bacterial lipids								91	10	0	0.0879121
TACSHACOCHA	-4.9	-74.3	90	3	1	5	0	0	0	0	0	0	0	0	0	0	0	Introducing global peat-specific temperature and pH calibrations based on brGDGT bacterial lipids								94	5	0	0.0531915
TACSHACOCHA	-4.9	-74.3	92	2	2	4	0	0	0	0	0	0	0	0	0	0	0	Introducing global peat-specific temperature and pH calibrations based on brGDGT bacterial lipids								96	4	0	0.0625
TACSHACOCHA	-4.9	-74.3	89	2	2	6	0	0	0	0	0	0	0	0	0	0	0	Introducing global peat-specific temperature and pH calibrations based on brGDGT bacterial lipids								93	6	0	0.0645161
TACSHACOCHA	-4.9	-74.3	91	1	1	6	0	0	0	0	0	0	0	0	0	0	0	Introducing global peat-specific temperature and pH calibrations based on brGDGT bacterial lipids								93	6	0	0.0322581
QUISTOCOCHA	-3.8	-73.3	96	1	1	2	0	0	0	0	0	0	0	0	0	0	0	Introducing global peat-specific temperature and pH calibrations based on brGDGT bacterial lipids								98	2	0	0.0306122
QUISTOCOCHA	-3.8	-73.3	94	1	1	4	0	0	0	0	0	0	0	0	0	0	0	Introducing global peat-specific temperature and pH calibrations based on brGDGT bacterial lipids								96	4	0	0.03125
QUISTOCOCHA	-3.8	-73.3	95	1	1	3	0	0	0	0	0	0	0	0	0	0	0	Introducing global peat-specific temperature and pH calibrations based on brGDGT bacterial lipids								97	3	0	0.0309278
Bomfield Swamp	-17.4	145.5	84	7	2	5	0	0	1	0	0	1	1	0	0	0	0	Introducing global peat-specific temperature and pH calibrations based on brGDGT bacterial lipids								93	6	2	0.11828
Bomfield Swamp	-17.4	145.5	78	6	2	12	0	1	0	0	0	1	0	0	0	0	0	Introducing global peat-specific temperature and pH calibrations based on brGDGT bacterial lipids								86	13	1	0.116279
Bomfield Swamp	-17.4	145.5	79	6	2	11	0	0	0	0	0	1	0	0	0	0	0	Introducing global peat-specific temperature and pH calibrations based on brGDGT bacterial lipids								87	11	1	0.114943
Bomfield Swamp	-17.4	145.5	78	6	2	12	0	1	0	0	0	1	0	0	0	0	0	Introducing global peat-specific temperature and pH calibrations based on brGDGT bacterial lipids								86	13	1	0.116279
Bomfield Swamp	-17.4	145.5	79	6	2	11	0	1	0	0	0	1	0	0	0	0	0	Introducing global peat-specific temperature and pH calibrations based on brGDGT bacterial lipids								87	12	1	0.114943
Bomfield Swamp	-17.4	145.5	79	5	3	11	0	0	0	0	0	2	0	0	0	0	0	Introducing global peat-specific temperature and pH calibrations based on brGDGT bacterial lipids								87	11	2	0.126437
Bomfield Swamp	-17.4	145.5	81	5	2	11	0	0	0	0	0	1	0	0	0	0	0	Introducing global peat-specific temperature and pH calibrations based on brGDGT bacterial lipids								88	11	1	0.102273
Bomfield Swamp	-17.4	145.5	80	5	2	12	0	1	0	0	0	1	0	0	0	0	0	Introducing global peat-specific temperature and pH calibrations based on brGDGT bacterial lipids								87	13	1	0.103448
Bomfield Swamp	-17.4	145.5	77	4	2	15	0	1	0	0	0	1	0	0	0	0	0	Introducing global peat-specific temperature and pH calibrations based on brGDGT bacterial lipids								83	16	1	0.0963855
Bomfield Swamp	-17.4	145.5	77	5	2	7	8	1	0	0	0	0	1	0	0	0	0	Introducing global peat-specific temperature and pH calibrations based on brGDGT bacterial lipids								84	16	1	0.107143
Bomfield Swamp	-17.4	145.5	76	4	1	16	0	1	0	0	0	1	0	0	0	0	0	Introducing global peat-specific temperature and pH calibrations based on brGDGT bacterial lipids								81	17	1	0.0740741
Bomfield Swamp	-17.4	145.5	75	5	1	16	0	1	0	0	0	1	0	0	0	0	0	Introducing global peat-specific temperature and pH calibrations based on brGDGT bacterial lipids								81	17	1	0.0864198
Bomfield Swamp	-17.4	145.5	77	4	1	14	0	1	0	0	0	1	0	0	0	0	0	Introducing global peat-specific temperature and pH calibrations based on brGDGT bacterial lipids								82	15	1	0.0731707
Bomfield Swamp	-17.4	145.5	76	9	3	6	5	1	0	0	0	0	0	0	0	0	0	Introducing global peat-specific temperature and pH calibrations based on brGDGT bacterial lipids								88	12	0	0.170455
SKY1	-52.5	-72.1	48	1	1	41	0	1	0	0	0	8	0	0	0	0	0	Introducing global peat-specific temperature and pH calibrations based on brGDGT bacterial lipids								50	42	8	0.06
SKY1	-52.5	-72.1	60	2	1	32	0	1	0	0	0	4	0	0	0	0	0	Introducing global peat-specific temperature and pH calibrations based on brGDGT bacterial lipids								63	33	4	0.0634921
SKY1	-52.5	-72.1	42	2	1	43	0	1	0	0	0	11	0	0	0	0	0	Introducing global peat-specific temperature and pH calibrations based on brGDGT bacterial lipids								45	44	11	0.0888889
SKY1	-52.5	-72.1	40	2	0	44	0	1	0	1	0	12	0	0	0	0	0	Introducing global peat-specific temperature and pH calibrations based on brGDGT bacterial lipids								42	46	12	0.047619
SKY1	-52.5	-72.1	32	1	1	48	0	1	0	1	0	17	0	0	0	0	0	Introducing global peat-specific temperature and pH calibrations based on brGDGT bacterial lipids								34	50	17	0.0882353
SKY1	-52.5	-72.1	36	1	1	20	28	1	0	1	0	13	0	0	0	0	0	Introducing global peat-specific temperature and pH calibrations based on brGDGT bacterial lipids								38	50	13	0.0789474
Sebangau/Saganbau	-2.3	113.9	95	2	2	1	0	0	0	0	0	0	0	0	0	0	0	Introducing global peat-specific temperature and pH calibrations based on brGDGT bacterial lipids								99	1	0	0.0606061
Sebangau/Saganbau	-2.3	113.9	95	2	2	0	0	0	0	0	0	0	0	0	0	0	0	Introducing global peat-specific temperature and pH calibrations based on brGDGT bacterial lipids								99	0	0	0.0606061
Sebangau/Saganbau	-2.3	113.9	96	2	2	0	0	0	0	0	0	0	0	0	0	0	0	Introducing global peat-specific temperature and pH calibrations based on brGDGT bacterial lipids								100	0	0	0.06
Sebangau/Saganbau	-2.3	113.9	96	2	2	0	0	0	0	0	0	0	0	0	0	0	0	Introducing global peat-specific temperature and pH calibrations based on brGDGT bacterial lipids								100	0	0	0.06
Sebangau/Saganbau	-2.3	113.9	96	2	2	1	0	0	0	0	0	0	0	0	0	0	0	Introducing global peat-specific temperature and pH calibrations based on brGDGT bacterial lipids								100	1	0	0.06
Sebangau/Saganbau	-2.3	113.9	95	2	2	1	0	0	0	0	0	0	0	0	0	0	0	Introducing global peat-specific temperature and pH calibrations based on brGDGT bacterial lipids								99	1	0	0.0606061
Sebangau/Saganbau	-2.3	113.9	95	2	2	1	0	0	0	0	0	0	0	0	0	0	0	Introducing global peat-specific temperature and pH calibrations based on brGDGT bacterial lipids								99	1	0	0.0606061
Sebangau/Saganbau	-2.3	113.9	95	1	2	1	0	0	0	0	0	0	0	0	0	0	0	Introducing global peat-specific temperature and pH calibrations based on brGDGT bacterial lipids								98	1	0	0.0510204
Sebangau/Saganbau	-2.3	113.9	97	1	1	0	0	0	0	0	0	0	0	0	0	0	0	Introducing global peat-specific temperature and pH calibrations based on brGDGT bacterial lipids								99	0	0	0.030303
Sebangau/Saganbau	-2.3	113.9	96	2	2	1	0	0	0	0	0	0	0	0	0	0	0	Introducing global peat-specific temperature and pH calibrations based on brGDGT bacterial lipids								100	1	0	0.06
Sebangau/Saganbau	-2.3	113.9	94	2	3	1	0	0	0	0	0	0	0	0	0	0	0	Introducing global peat-specific temperature and pH calibrations based on brGDGT bacterial lipids								99	1	0	0.0808081
Okefenokee Swamp	30.6	-82.3	85	4	2	8	0	0	0	0	0	0	0	0	0	0	0	Introducing global peat-specific temperature and pH calibrations based on brGDGT bacterial lipids								91	8	0	0.0879121
Dismal Swamp	36.7	-76.6	72	5	5	16	0	1	0	0	0	1	0	0	0	0	0	Introducing global peat-specific temperature and pH calibrations based on brGDGT bacterial lipids								82	17	1	0.182927
North Carolina Peat (First colony farms)	35	-77	74	6	4	14	0	1	0	0	0	1	0	0	0	0	0	Introducing global peat-specific temperature and pH calibrations based on brGDGT bacterial lipids								84	15	1	0.166667
Rhizophora peat (or Shark River peat), Everglades NP	25.2	-81	46	15	10	7	11	3	3	0	1	2	2	0	0	0	0	Introducing global peat-specific temperature and pH calibrations based on brGDGT bacterial lipids								71	25	4	0.492958
Okefenokee Swamp	30.6	-82.3	85	4	3	8	0	0	0	0	0	0	0	0	0	0	0	Introducing global peat-specific temperature and pH calibrations based on brGDGT bacterial lipids								92	8	0	0.108696
Snuggedy Swamp Peat (South Carolina)	32	-81.3	62	12	6	14	0	3	0	2	0	1	0	0	0	0	0	Introducing global peat-specific temperature and pH calibrations based on brGDGT bacterial lipids								80	19	1	0.3
Okefenokee Swamp	30.6	-82.3	85	3	2	9	0	0	0	0	0	1	0	0	0	0	0	Introducing global peat-specific temperature and pH calibrations based on brGDGT bacterial lipids								90	9	1	0.0777778
Tamiami Sawgrass Peat	26	-81	41	22	6	14	6	5	2	1	0	1	1	0	0	0	0	Introducing global peat-specific temperature and pH calibrations based on brGDGT bacterial lipids								69	28	2	0.492754
New York Peat (Fort Drum)	44	-75	17	13	4	19	12	8	5	1	1	10	7	1	1	0	0	Introducing global peat-specific temperature and pH calibrations based on brGDGT bacterial lipids								34	46	19	0.617647
Loxahatchee Sawgrass Peat, Everglades NP	26	-80.5	69	12	3	11	3	1	0	0	0	1	0	0	0	0	0	Introducing global peat-specific temperature and pH calibrations based on brGDGT bacterial lipids								84	15	1	0.214286
Loxahatchee Nymphaea Peat, Everglades NP	26	-80.5	63	15	3	12	3	2	1	0	0	1	1	0	0	0	0	Introducing global peat-specific temperature and pH calibrations based on brGDGT bacterial lipids								81	18	2	0.259259
Maine Sphagnum peat	45	-68	54	4	1	34	0	2	0	0	0	3	0	0	0	0	0	Introducing global peat-specific temperature and pH calibrations based on brGDGT bacterial lipids								59	36	3	0.101695
Zalama	43.1	-3.4	46	7	2	37	0	3	0	1	0	4	0	0	0	0	0	Introducing global peat-specific temperature and pH calibrations based on brGDGT bacterial lipids								55	41	4	0.2
Zalama	43.1	-3.4	52	3	1	38	0	1	0	1	0	4	0	0	0	0	0	Introducing global peat-specific temperature and pH calibrations based on brGDGT bacterial lipids								56	40	4	0.0892857
Zalama	43.1	-3.4	51	3	2	38	0	2	0	1	0	3	0	0	0	0	0	Introducing global peat-specific temperature and pH calibrations based on brGDGT bacterial lipids								56	41	3	0.125
Zalama	43.1	-3.4	53	1	1	41	0	1	0	0	0	3	0	0	0	0	0	Introducing global peat-specific temperature and pH calibrations based on brGDGT bacterial lipids								55	42	3	0.0545455
Zalama	43.1	-3.4	49	7	2	35	0	4	0	1	0	3	0	0	0	0	0	Introducing global peat-specific temperature and pH calibrations based on brGDGT bacterial lipids								58	40	3	0.189655
Zalama	43.1	-3.4	43	7	3	37	0	5	0	1	0	4	0	0	0	0	0	Introducing global peat-specific temperature and pH calibrations based on brGDGT bacterial lipids								53	43	4	0.245283
Zalama	43.1	-3.4	59	3	1	32	0	1	0	0	0	3	0	0	0	0	0	Introducing global peat-specific temperature and pH calibrations based on brGDGT bacterial lipids								63	33	3	0.0793651
Zalama	43.1	-3.4	51	5	1	38	0	2	0	1	0	3	0	0	0	0	0	Introducing global peat-specific temperature and pH calibrations based on brGDGT bacterial lipids								57	41	3	0.122807
Chao de Veiga Mol	43.5	-7.5	55	3	1	32	0	2	0	1	0	5	0	0	0	0	0	Introducing global peat-specific temperature and pH calibrations based on brGDGT bacterial lipids								59	35	5	0.0847458
Chao de Veiga Mol	43.5	-7.5	60	3	1	31	0	1	0	1	0	3	0	0	0	0	0	Introducing global peat-specific temperature and pH calibrations based on brGDGT bacterial lipids								64	33	3	0.078125
Chao de Veiga Mol	43.5	-7.5	52	3	1	37	0	2	0	1	0	5	0	0	0	0	0	Introducing global peat-specific temperature and pH calibrations based on brGDGT bacterial lipids								56	40	5	0.0892857
Chao de Veiga Mol	43.5	-7.5	61	1	0	33	0	0	0	0	0	3	1	0	0	0	0	Introducing global peat-specific temperature and pH calibrations based on brGDGT bacterial lipids								62	33	4	0.016129
Chao de Veiga Mol	43.5	-7.5	49	3	2	38	0	2	0	1	0	5	0	0	0	0	0	Introducing global peat-specific temperature and pH calibrations based on brGDGT bacterial lipids								54	41	5	0.12963
Chao de Veiga Mol	43.5	-7.5	62	3	1	28	0	1	0	1	0	3	0	0	0	0	0	Introducing global peat-specific temperature and pH calibrations based on brGDGT bacterial lipids								66	30	3	0.0757576
Chao de Veiga Mol	43.5	-7.5	49	3	2	37	0	2	0	1	0	5	0	0	0	0	0	Introducing global peat-specific temperature and pH calibrations based on brGDGT bacterial lipids								54	40	5	0.12963
Chao de Veiga Mol	43.5	-7.5	45	3	1	43	0	2	0	1	0	5	0	0	0	0	0	Introducing global peat-specific temperature and pH calibrations based on brGDGT bacterial lipids								49	46	5	0.102041
Borralleiras da Cal Grande	43.6	-7.5	63	3	0	28	0	1	0	0	0	3	0	0	0	0	0	Introducing global peat-specific temperature and pH calibrations based on brGDGT bacterial lipids								66	29	3	0.0454545
Borralleiras da Cal Grande	43.6	-7.5	61	4	1	28	0	1	0	0	0	4	0	0	0	0	0	Introducing global peat-specific temperature and pH calibrations based on brGDGT bacterial lipids								66	29	4	0.0909091
Borralleiras da Cal Grande	43.6	-7.5	58	4	1	32	0	1	0	1	0	4	0	0	0	0	0	Introducing global peat-specific temperature and pH calibrations based on brGDGT bacterial lipids								63	34	4	0.0952381
Borralleiras da Cal Grande	43.6	-7.5	48	3	2	41	0	1	0	1	0	4	0	0	0	0	0	Introducing global peat-specific temperature and pH calibrations based on brGDGT bacterial lipids								53	43	4	0.132075
Borralleiras da Cal Grande	43.6	-7.5	46	3	3	40	0	2	0	1	0	5	0	0	0	0	0	Introducing global peat-specific temperature and pH calibrations based on brGDGT bacterial lipids								52	43	5	0.173077
Borralleiras da Cal Grande	43.6	-7.5	45	6	2	37	0	4	0	1	0	5	1	0	0	0	0	Introducing global peat-specific temperature and pH calibrations based on brGDGT bacterial lipids								53	42	6	0.188679
Peat near Neor Lake	38	48.6	15	8	2	31	10	5	3	1	0	17	7	0	0	0	0	Introducing global peat-specific temperature and pH calibrations based on brGDGT bacterial lipids								25	50	24	0.48
Peat near Neor Lake	38	48.6	12	7	1	32	9	5	2	1	0	23	6	0	0	0	0	Introducing global peat-specific temperature and pH calibrations based on brGDGT bacterial lipids								20	49	29	0.45
Peat near Neor Lake	38	48.6	19	7	1	37	9	3	2	1	0	16	4	0	0	0	0	Introducing global peat-specific temperature and pH calibrations based on brGDGT bacterial lipids								27	52	20	0.333333
Peat near Neor Lake	38	48.6	19	10	2	34	8	5	2	1	0	15	4	0	0	0	0	Introducing global peat-specific temperature and pH calibrations based on brGDGT bacterial lipids								31	50	19	0.451613
Peat near Neor Lake	38	48.6	15	8	1	35	9	6	2	1	0	18	4	0	0	0	0	Introducing global peat-specific temperature and pH calibrations based on brGDGT bacterial lipids								24	53	22	0.416667
Peat near Neor Lake	38	48.6	14	9	1	27	12	7	2	0	0	19	7	0	0	0	0	Introducing global peat-specific temperature and pH calibrations based on brGDGT bacterial lipids								24	48	26	0.458333
Peat near Neor Lake	38	48.6	12	9	2	28	10	7	4	1	1	19	7	1	1	0	0	Introducing global peat-specific temperature and pH calibrations based on brGDGT bacterial lipids								23	51	28	0.565217
Pau de Fruta	-18.3	-43.7	82	3	2	11	0	0	0	0	0	1	0	0	0	0	0	Introducing global peat-specific temperature and pH calibrations based on brGDGT bacterial lipids								87	11	1	0.0804598
Pau de Fruta	-18.3	-43.7	81	4	1	12	0	1	0	0	0	1	0	0	0	0	0	Introducing global peat-specific temperature and pH calibrations based on brGDGT bacterial lipids								86	13	1	0.0697674
Pau de Fruta	-18.3	-43.7	82	3	2	12	0	0	0	0	0	1	0	0	0	0	0	Introducing global peat-specific temperature and pH calibrations based on brGDGT bacterial lipids								87	12	1	0.0804598
Pau de Fruta	-18.3	-43.7	85	2	2	10	0	0	0	0	0	1	0	0	0	0	0	Introducing global peat-specific temperature and pH calibrations based on brGDGT bacterial lipids								89	10	1	0.0674157
Pau de Fruta	-18.3	-43.7	83	2	2	12	0	0	0	0	0	1	0	0	0	0	0	Introducing global peat-specific temperature and pH calibrations based on brGDGT bacterial lipids								87	12	1	0.0689655
Pau de Fruta	-18.3	-43.7	84	2	2	11	0	0	0	0	0	1	0	0	0	0	0	Introducing global peat-specific temperature and pH calibrations based on brGDGT bacterial lipids								88	11	1	0.0681818
SÃ£o JoÃ£o de Chapada	-18.1	-43.8	83	1	2	12	0	0	0	0	0	1	0	0	0	0	0	Introducing global peat-specific temperature and pH calibrations based on brGDGT bacterial lipids								86	12	1	0.0581395
SÃ£o JoÃ£o de Chapada	-18.1	-43.8	85	2	2	10	0	0	0	0	0	1	0	0	0	0	0	Introducing global peat-specific temperature and pH calibrations based on brGDGT bacterial lipids								89	10	1	0.0674157
SÃ£o JoÃ£o de Chapada	-18.1	-43.8	91	4	1	4	0	0	0	0	0	0	0	0	0	0	0	Introducing global peat-specific temperature and pH calibrations based on brGDGT bacterial lipids								96	4	0	0.0625
SÃ£o JoÃ£o de Chapada	-18.1	-43.8	81	2	2	13	0	1	0	0	0	1	0	0	0	0	0	Introducing global peat-specific temperature and pH calibrations based on brGDGT bacterial lipids								85	14	1	0.0705882
SÃ£o JoÃ£o de Chapada	-18.1	-43.8	86	2	3	8	0	0	0	0	0	0	0	0	0	0	0	Introducing global peat-specific temperature and pH calibrations based on brGDGT bacterial lipids								91	8	0	0.0879121
Sempre Viva	-17.9	-43.8	80	4	6	9	0	0	0	0	0	0	0	0	0	0	0	Introducing global peat-specific temperature and pH calibrations based on brGDGT bacterial lipids								90	9	0	0.177778
Sempre Viva	-17.9	-43.8	82	3	5	9	0	0	0	0	0	0	0	0	0	0	0	Introducing global peat-specific temperature and pH calibrations based on brGDGT bacterial lipids								90	9	0	0.144444
Sempre Viva	-17.9	-43.8	81	2	3	13	0	0	0	0	0	1	0	0	0	0	0	Introducing global peat-specific temperature and pH calibrations based on brGDGT bacterial lipids								86	13	1	0.0930233
Sempre Viva	-17.9	-43.8	81	2	2	15	0	0	0	0	0	1	0	0	0	0	0	Introducing global peat-specific temperature and pH calibrations based on brGDGT bacterial lipids								85	15	1	0.0705882
Sempre Viva	-17.9	-43.8	89	5	1	5	0	0	0	0	0	0	0	0	0	0	0	Introducing global peat-specific temperature and pH calibrations based on brGDGT bacterial lipids								95	5	0	0.0736842
Pinheiros	-18.1	-43.7	90	2	4	4	0	0	0	0	0	0	0	0	0	0	0	Introducing global peat-specific temperature and pH calibrations based on brGDGT bacterial lipids								96	4	0	0.104167
Pinheiros	-18.1	-43.7	72	1	2	22	0	0	0	0	0	2	0	0	0	0	0	Introducing global peat-specific temperature and pH calibrations based on brGDGT bacterial lipids								75	22	2	0.0666667
Pinheiros	-18.1	-43.7	73	1	1	23	0	0	0	0	0	2	0	0	0	0	0	Introducing global peat-specific temperature and pH calibrations based on brGDGT bacterial lipids								75	23	2	0.04
Pinheiros	-18.1	-43.7	78	1	0	20	0	0	0	0	0	2	0	0	0	0	0	Introducing global peat-specific temperature and pH calibrations based on brGDGT bacterial lipids								79	20	2	0.0126582
Pinheiros	-18.1	-43.7	83	1	2	13	0	0	0	0	0	1	0	0	0	0	0	Introducing global peat-specific temperature and pH calibrations based on brGDGT bacterial lipids								86	13	1	0.0581395
Pinheiros	-18.1	-43.7	84	1	2	11	0	0	0	0	0	1	0	0	0	0	0	Introducing global peat-specific temperature and pH calibrations based on brGDGT bacterial lipids								87	11	1	0.0574713
Igarka Site 1+2	67.5	86.6	22	1	0	45	0	0	1	0	0	26	5	0	0	0	0	Introducing global peat-specific temperature and pH calibrations based on brGDGT bacterial lipids								23	46	31	0.0434783
Igarka Site 1+2	67.5	86.6	26	5	1	29	15	2	2	0	0	15	5	0	0	0	0	Introducing global peat-specific temperature and pH calibrations based on brGDGT bacterial lipids								32	48	20	0.21875
Igarka Site 1+2	67.5	86.6	26	4	1	30	14	2	2	0	0	15	6	0	0	0	0	Introducing global peat-specific temperature and pH calibrations based on brGDGT bacterial lipids								31	48	21	0.193548
Igarka Site 1+2	67.5	86.6	26	4	1	30	15	1	2	0	0	14	6	0	0	0	0	Introducing global peat-specific temperature and pH calibrations based on brGDGT bacterial lipids								31	48	20	0.193548
Igarka Site 1+2	67.5	86.6	29	5	1	31	13	2	2	0	0	12	5	0	0	0	0	Introducing global peat-specific temperature and pH calibrations based on brGDGT bacterial lipids								35	48	17	0.2
Igarka Site 1+2	67.5	86.6	29	4	1	33	13	1	2	0	0	13	5	0	0	0	0	Introducing global peat-specific temperature and pH calibrations based on brGDGT bacterial lipids								34	49	18	0.176471
Walton Moss	55	-2.8	53	5	2	33	0	2	0	1	0	4	0	0	0	0	0	Introducing global peat-specific temperature and pH calibrations based on brGDGT bacterial lipids								60	36	4	0.15
Walton Moss	55	-2.8	54	1	0	38	0	1	0	0	0	5	0	0	0	0	0	Introducing global peat-specific temperature and pH calibrations based on brGDGT bacterial lipids								55	39	5	0.0181818
Walton Moss	55	-2.8	55	2	1	36	0	1	0	0	0	5	0	0	0	0	0	Introducing global peat-specific temperature and pH calibrations based on brGDGT bacterial lipids								58	37	5	0.0689655
Walton Moss	55	-2.8	57	2	0	35	0	1	0	0	0	5	0	0	0	0	0	Introducing global peat-specific temperature and pH calibrations based on brGDGT bacterial lipids								59	36	5	0.0338983
Walton Moss	55	-2.8	65	1	0	29	0	1	0	1	0	3	0	0	0	0	0	Introducing global peat-specific temperature and pH calibrations based on brGDGT bacterial lipids								66	31	3	0.0151515
Walton Moss	55	-2.8	56	1	0	37	0	1	0	0	0	5	0	0	0	0	0	Introducing global peat-specific temperature and pH calibrations based on brGDGT bacterial lipids								57	38	5	0.0175439
Harberton	-54.9	-67.2	45	6	2	37	0	1	0	1	0	7	2	0	0	0	0	Introducing global peat-specific temperature and pH calibrations based on brGDGT bacterial lipids								53	39	9	0.188679
Harberton	-54.9	-67.2	52	7	1	36	0	0	0	0	0	4	0	0	0	0	0	Introducing global peat-specific temperature and pH calibrations based on brGDGT bacterial lipids								60	36	4	0.15
Harberton	-54.9	-67.2	52	7	1	34	0	1	0	0	0	5	0	0	0	0	0	Introducing global peat-specific temperature and pH calibrations based on brGDGT bacterial lipids								60	35	5	0.15
Harberton	-54.9	-67.2	52	2	0	37	0	1	0	0	0	7	0	0	0	0	0	Introducing global peat-specific temperature and pH calibrations based on brGDGT bacterial lipids								54	38	7	0.037037
Harberton	-54.9	-67.2	39	1	1	47	0	1	0	1	0	11	0	0	0	0	0	Introducing global peat-specific temperature and pH calibrations based on brGDGT bacterial lipids								41	49	11	0.0731707
Harberton	-54.9	-67.2	47	4	1	40	0	1	0	0	0	7	0	0	0	0	0	Introducing global peat-specific temperature and pH calibrations based on brGDGT bacterial lipids								52	41	7	0.115385
Harberton	-54.9	-67.2	41	1	0	45	0	1	0	1	0	10	0	0	0	0	0	Introducing global peat-specific temperature and pH calibrations based on brGDGT bacterial lipids								42	47	10	0.0238095
Harberton	-54.9	-67.2	37	2	0	47	0	1	0	0	0	11	2	0	0	0	0	Introducing global peat-specific temperature and pH calibrations based on brGDGT bacterial lipids								39	48	13	0.0512821
Brendan State Forest	39.9	-74.5	69	2	2	24	0	1	0	0	0	2	0	0	0	0	0	Introducing global peat-specific temperature and pH calibrations based on brGDGT bacterial lipids								73	25	2	0.0821918
Brendan State Forest	39.9	-74.5	65	3	2	26	0	1	0	1	0	3	0	0	0	0	0	Introducing global peat-specific temperature and pH calibrations based on brGDGT bacterial lipids								70	28	3	0.1
Brendan State Forest	39.9	-74.5	63	4	3	26	0	1	0	1	0	2	0	0	0	0	0	Introducing global peat-specific temperature and pH calibrations based on brGDGT bacterial lipids								70	28	2	0.142857
Brendan State Forest	39.9	-74.5	64	4	3	24	0	1	0	1	0	2	0	0	0	0	0	Introducing global peat-specific temperature and pH calibrations based on brGDGT bacterial lipids								71	26	2	0.140845
Brendan State Forest	39.9	-74.5	60	4	4	27	0	1	0	1	0	2	0	0	0	0	0	Introducing global peat-specific temperature and pH calibrations based on brGDGT bacterial lipids								68	29	2	0.176471
Brendan State Forest	39.9	-74.5	61	4	4	26	0	1	0	1	0	2	0	0	0	0	0	Introducing global peat-specific temperature and pH calibrations based on brGDGT bacterial lipids								69	28	2	0.173913
Brendan State Forest	39.9	-74.5	55	3	3	33	0	1	0	1	0	4	0	0	0	0	0	Introducing global peat-specific temperature and pH calibrations based on brGDGT bacterial lipids								61	35	4	0.147541
Brendan State Forest	39.9	-74.5	60	4	4	27	0	1	0	1	0	3	0	0	0	0	0	Introducing global peat-specific temperature and pH calibrations based on brGDGT bacterial lipids								68	29	3	0.176471
Stordalen	68.4	19.1	51	0	1	44	0	0	0	0	0	4	0	0	0	0	0	Introducing global peat-specific temperature and pH calibrations based on brGDGT bacterial lipids								52	44	4	0.0384615
Stordalen	68.4	19.1	52	0	0	43	0	0	0	0	0	4	0	0	0	0	0	Introducing global peat-specific temperature and pH calibrations based on brGDGT bacterial lipids								52	43	4	0
Stordalen	68.4	19.1	36	1	0	47	0	1	0	0	0	14	2	0	0	0	0	Introducing global peat-specific temperature and pH calibrations based on brGDGT bacterial lipids								37	48	16	0.027027
Stordalen	68.4	19.1	29	0	0	52	0	1	0	0	0	16	1	0	0	0	0	Introducing global peat-specific temperature and pH calibrations based on brGDGT bacterial lipids								29	53	17	0
Stordalen	68.4	19.1	25	0	0	55	0	1	0	0	0	18	2	0	0	0	0	Introducing global peat-specific temperature and pH calibrations based on brGDGT bacterial lipids								25	56	20	0
Bodmin Moor	50.6	-4.6	52	0	0	36	0	1	0	0	0	10	0	0	0	0	0	Introducing global peat-specific temperature and pH calibrations based on brGDGT bacterial lipids								52	37	10	0
Bodmin Moor	50.6	-4.6	48	4	1	37	0	1	0	0	0	9	0	0	0	0	0	Introducing global peat-specific temperature and pH calibrations based on brGDGT bacterial lipids								53	38	9	0.113208
Kosowa mire	53.8	16.6	76	0	0	19	0	0	0	0	0	1	0	3	0	0	0	Introducing global peat-specific temperature and pH calibrations based on brGDGT bacterial lipids								76	19	4	0
Kosowa mire	53.8	16.6	73	1	1	24	0	0	0	0	0	2	0	0	0	0	0	Introducing global peat-specific temperature and pH calibrations based on brGDGT bacterial lipids								75	24	2	0.04
Poleur	50.5	6	46	2	0	37	0	1	0	1	0	13	0	0	0	0	0	Introducing global peat-specific temperature and pH calibrations based on brGDGT bacterial lipids								48	39	13	0.0416667
Poleur	50.5	6	31	3	1	38	0	3	0	0	0	24	0	0	0	0	0	Introducing global peat-specific temperature and pH calibrations based on brGDGT bacterial lipids								35	41	24	0.142857
Tanet	48.1	7.1	52	0	1	42	0	0	0	0	0	5	0	0	0	0	0	Introducing global peat-specific temperature and pH calibrations based on brGDGT bacterial lipids								53	42	5	0.0377358
Tanet	48.1	7.1	62	0	4	32	0	0	0	0	0	2	0	0	0	0	0	Introducing global peat-specific temperature and pH calibrations based on brGDGT bacterial lipids								66	32	2	0.121212
Tanet	48.1	7.1	62	1	1	33	0	0	0	0	0	3	0	0	0	0	0	Introducing global peat-specific temperature and pH calibrations based on brGDGT bacterial lipids								64	33	3	0.046875
Tanet	48.1	7.1	56	0	1	39	0	0	0	0	0	4	0	0	0	0	0	Introducing global peat-specific temperature and pH calibrations based on brGDGT bacterial lipids								57	39	4	0.0350877
OHM Vicdessos	42.8	1.4	48	1	0	36	0	1	0	0	0	14	0	0	0	0	0	Introducing global peat-specific temperature and pH calibrations based on brGDGT bacterial lipids								49	37	14	0.0204082
OHM Vicdessos	42.8	1.4	68	4	1	24	0	0	0	1	0	2	0	0	0	0	0	Introducing global peat-specific temperature and pH calibrations based on brGDGT bacterial lipids								73	25	2	0.0821918
OHM Vicdessos	42.8	1.4	53	1	0	40	0	0	0	0	0	6	0	0	0	0	0	Introducing global peat-specific temperature and pH calibrations based on brGDGT bacterial lipids								54	40	6	0.0185185
Storamyran	63.7	20.1	70	0	0	28	0	0	0	0	0	2	0	0	0	0	0	Introducing global peat-specific temperature and pH calibrations based on brGDGT bacterial lipids								70	28	2	0
Storamyran	63.7	20.1	66	1	1	31	0	0	0	0	0	2	0	0	0	0	0	Introducing global peat-specific temperature and pH calibrations based on brGDGT bacterial lipids								68	31	2	0.0441176
Simplon	46.2	8	55	1	1	35	0	1	0	0	0	7	0	0	0	0	0	Introducing global peat-specific temperature and pH calibrations based on brGDGT bacterial lipids								57	36	7	0.0526316
Simplon	46.2	8	63	1	0	30	0	0	0	0	0	6	0	0	0	0	0	Introducing global peat-specific temperature and pH calibrations based on brGDGT bacterial lipids								64	30	6	0.015625
FjallsjÃ¶kull	64	16.4	8	1	1	7	23	1	4	0	0	3	51	0	0	0	0	Introducing global peat-specific temperature and pH calibrations based on brGDGT bacterial lipids								10	35	54	0.3
FjallsjÃ¶kull	64	16.4	8	1	1	7	24	1	4	0	0	4	51	0	0	0	0	Introducing global peat-specific temperature and pH calibrations based on brGDGT bacterial lipids								10	36	55	0.3
Fachepremont	46.1	7	72	1	1	23	0	0	0	0	0	2	0	0	0	0	0	Introducing global peat-specific temperature and pH calibrations based on brGDGT bacterial lipids								74	23	2	0.0405405
Fachepremont	46.1	7	74	0	1	24	0	0	0	0	0	2	0	0	0	0	0	Introducing global peat-specific temperature and pH calibrations based on brGDGT bacterial lipids								75	24	2	0.0266667
Pinet Fosse	42.9	2	61	2	1	33	0	1	0	0	0	3	0	0	0	0	0	Introducing global peat-specific temperature and pH calibrations based on brGDGT bacterial lipids								64	34	3	0.0625
Pinet Fosse	42.9	2	60	2	0	34	0	1	0	0	0	3	0	0	0	0	0	Introducing global peat-specific temperature and pH calibrations based on brGDGT bacterial lipids								62	35	3	0.0322581
Pinet Fosse	42.9	2	56	4	1	36	0	1	0	0	0	3	0	0	0	0	0	Introducing global peat-specific temperature and pH calibrations based on brGDGT bacterial lipids								61	37	3	0.0983607
Linje mire	53.1	18.2	61	0	0	28	0	0	0	0	0	9	0	0	0	0	0	Introducing global peat-specific temperature and pH calibrations based on brGDGT bacterial lipids								61	28	9	0
Linje mire	53.1	18.2	70	2	3	22	0	0	0	0	0	2	0	0	0	0	0	Introducing global peat-specific temperature and pH calibrations based on brGDGT bacterial lipids								75	22	2	0.106667
N. Norway	69	15.3	48	1	1	42	0	0	0	0	0	7	0	0	0	0	0	Introducing global peat-specific temperature and pH calibrations based on brGDGT bacterial lipids								50	42	7	0.06
S. Iceland	63.4	-18.8	17	4	1	13	30	2	4	0	0	7	20	0	0	0	0	Introducing global peat-specific temperature and pH calibrations based on brGDGT bacterial lipids								22	49	27	0.272727
S. Iceland	63.4	-18.8	17	4	1	14	29	3	3	0	0	10	17	0	0	0	0	Introducing global peat-specific temperature and pH calibrations based on brGDGT bacterial lipids								22	49	27	0.272727
Zamarte mire	53.4	17.6	69	0	1	25	0	0	0	0	0	4	0	0	0	0	0	Introducing global peat-specific temperature and pH calibrations based on brGDGT bacterial lipids								70	25	4	0.0285714
Zamarte mire	53.4	17.6	66	0	0	31	0	0	0	0	0	3	0	0	0	0	0	Introducing global peat-specific temperature and pH calibrations based on brGDGT bacterial lipids								66	31	3	0
Rzecin mire	52.5	16.2	63	0	1	33	0	0	0	0	0	3	0	0	0	0	0	Introducing global peat-specific temperature and pH calibrations based on brGDGT bacterial lipids								64	33	3	0.03125
Rzecin mire	52.5	16.2	60	1	4	29	0	0	0	0	0	6	0	0	0	0	0	Introducing global peat-specific temperature and pH calibrations based on brGDGT bacterial lipids								65	29	6	0.138462
Rzecin mire	52.5	16.2	66	1	0	29	0	0	0	0	0	4	0	0	0	0	0	Introducing global peat-specific temperature and pH calibrations based on brGDGT bacterial lipids								67	29	4	0.0149254
Demoiselle	48.1	6.5	62	1	1	34	0	0	0	0	0	3	0	0	0	0	0	Introducing global peat-specific temperature and pH calibrations based on brGDGT bacterial lipids								64	34	3	0.046875
Demoiselle	48.1	6.5	67	0	0	30	0	0	0	0	0	3	0	0	0	0	0	Introducing global peat-specific temperature and pH calibrations based on brGDGT bacterial lipids								67	30	3	0
Demoiselle	48.1	6.5	60	0	0	35	0	0	0	0	0	5	0	0	0	0	0	Introducing global peat-specific temperature and pH calibrations based on brGDGT bacterial lipids								60	35	5	0
Flesch	46.2	8	60	1	0	30	5	0	0	0	0	2	1	0	0	0	0	Introducing global peat-specific temperature and pH calibrations based on brGDGT bacterial lipids								61	35	3	0.0163934
Flesch	46.2	8	54	1	0	40	0	0	0	0	0	4	1	0	0	0	0	Introducing global peat-specific temperature and pH calibrations based on brGDGT bacterial lipids								55	40	5	0.0181818
HÃ¤ngstli	46.8	7.8	81	1	1	15	0	0	0	0	0	2	0	0	0	0	0	Introducing global peat-specific temperature and pH calibrations based on brGDGT bacterial lipids								83	15	2	0.0361446
Nyabuiyabui	-0.4	35.8	51	4	1	36	0	1	0	1	0	7	0	0	0	0	0	Introducing global peat-specific temperature and pH calibrations based on brGDGT bacterial lipids								56	38	7	0.107143
Nyabuiyabui	-0.4	35.8	60	3	1	26	4	1	0	1	0	5	1	0	0	0	0	Introducing global peat-specific temperature and pH calibrations based on brGDGT bacterial lipids								64	32	6	0.078125
Nyabuiyabui	-0.4	35.8	39	2	1	50	0	2	0	2	0	5	0	0	0	0	0	Introducing global peat-specific temperature and pH calibrations based on brGDGT bacterial lipids								42	54	5	0.0952381
Shidodo	-1	34	84	4	1	9	1	0	0	0	0	1	0	0	0	0	0	Introducing global peat-specific temperature and pH calibrations based on brGDGT bacterial lipids								89	10	1	0.0674157
Shidodo	-1	34	80	4	1	10	2	0	0	0	0	1	0	0	0	0	0	Introducing global peat-specific temperature and pH calibrations based on brGDGT bacterial lipids								85	12	1	0.0705882
Shidodo	-1	34	70	5	2	16	4	1	0	1	0	2	1	0	0	0	0	Introducing global peat-specific temperature and pH calibrations based on brGDGT bacterial lipids								77	22	3	0.116883
Shidodo	-1	34	64	4	2	19	5	1	0	1	0	2	1	0	0	0	0	Introducing global peat-specific temperature and pH calibrations based on brGDGT bacterial lipids								70	26	3	0.114286
Shidodo	-1	34	62	4	1	22	5	1	0	0	0	3	1	0	0	0	0	Introducing global peat-specific temperature and pH calibrations based on brGDGT bacterial lipids								67	28	4	0.0895522
Shidodo	-1	34	64	2	1	24	3	1	0	0	0	4	1	0	0	0	0	Introducing global peat-specific temperature and pH calibrations based on brGDGT bacterial lipids								67	28	5	0.0597015
Luala	-9.3	34.6	68	4	1	23	0	0	0	0	0	3	0	0	0	0	0	Introducing global peat-specific temperature and pH calibrations based on brGDGT bacterial lipids								73	23	3	0.0821918
Luala	-9.3	34.6	67	2	1	26	0	0	0	0	0	3	0	0	0	0	0	Introducing global peat-specific temperature and pH calibrations based on brGDGT bacterial lipids								70	26	3	0.0571429
Marula	-0.2	36.4	62	3	1	25	3	1	0	1	0	3	0	0	0	0	0	Introducing global peat-specific temperature and pH calibrations based on brGDGT bacterial lipids								66	30	3	0.0757576
Marula	-0.2	36.4	59	4	1	22	2	2	0	2	0	4	2	0	0	2	0	Introducing global peat-specific temperature and pH calibrations based on brGDGT bacterial lipids								64	28	8	0.09375
Kitulu	-9.3	34.7	44	6	3	29	6	2	1	1	0	7	1	0	0	0	0	Introducing global peat-specific temperature and pH calibrations based on brGDGT bacterial lipids								53	39	8	0.226415
Kitulu	-9.3	34.7	48	5	2	30	4	1	0	1	0	7	1	0	0	0	0	Introducing global peat-specific temperature and pH calibrations based on brGDGT bacterial lipids								55	36	8	0.163636
Kitulu	-9.3	34.7	48	4	1	32	3	2	0	1	0	7	1	0	0	0	0	Introducing global peat-specific temperature and pH calibrations based on brGDGT bacterial lipids								53	38	8	0.113208
Kitulu	-9.3	34.7	48	5	2	34	0	2	0	1	0	7	1	0	0	0	0	Introducing global peat-specific temperature and pH calibrations based on brGDGT bacterial lipids								55	37	8	0.163636
Piyashiri	36	139.7	48	1	0	39	0	1	0	0	0	11	0	0	0	0	0	Introducing global peat-specific temperature and pH calibrations based on brGDGT bacterial lipids								49	40	11	0.0204082
Piyashiri	36	139.7	46	1	0	40	0	1	0	0	0	11	0	0	0	0	0	Introducing global peat-specific temperature and pH calibrations based on brGDGT bacterial lipids								47	41	11	0.0212766
Piyashiri	36	139.7	47	1	1	40	0	1	0	0	0	10	0	0	0	0	0	Introducing global peat-specific temperature and pH calibrations based on brGDGT bacterial lipids								49	41	10	0.0612245
Piyashiri	36	139.7	57	2	1	33	0	0	0	0	0	6	0	0	0	0	0	Introducing global peat-specific temperature and pH calibrations based on brGDGT bacterial lipids								60	33	6	0.0666667
Piyashiri	36	139.7	53	3	1	36	0	1	0	0	0	5	0	0	0	0	0	Introducing global peat-specific temperature and pH calibrations based on brGDGT bacterial lipids								57	37	5	0.0877193
Piyashiri	36	139.7	47	1	0	43	0	0	0	0	0	8	1	0	0	0	0	Introducing global peat-specific temperature and pH calibrations based on brGDGT bacterial lipids								48	43	9	0.0208333
Harz, Odersprung Bog	52.8	10.6	68	2	1	25	0	1	0	0	0	3	0	0	0	0	0	Introducing global peat-specific temperature and pH calibrations based on brGDGT bacterial lipids								71	26	3	0.056338
Harz, Odersprung Bog	52.8	10.6	56	1	0	35	0	1	0	0	0	6	0	0	0	0	0	Introducing global peat-specific temperature and pH calibrations based on brGDGT bacterial lipids								57	36	6	0.0175439
Harz, Odersprung Bog	52.8	10.6	59	1	1	33	0	1	0	0	0	6	0	0	0	0	0	Introducing global peat-specific temperature and pH calibrations based on brGDGT bacterial lipids								61	34	6	0.0491803
Harz, Odersprung Bog	52.8	10.6	60	1	1	32	0	1	0	0	0	5	0	0	0	0	0	Introducing global peat-specific temperature and pH calibrations based on brGDGT bacterial lipids								62	33	5	0.0483871
Harz, Odersprung Bog	52.8	10.6	59	1	1	32	0	1	0	0	0	5	0	0	0	0	0	Introducing global peat-specific temperature and pH calibrations based on brGDGT bacterial lipids								61	33	5	0.0491803
Harz, Odersprung Bog	52.8	10.6	56	2	1	37	0	1	0	0	0	3	0	0	0	0	0	Introducing global peat-specific temperature and pH calibrations based on brGDGT bacterial lipids								59	38	3	0.0677966
Harz, Odersprung Bog	52.8	10.6	59	2	1	34	0	1	0	0	0	3	0	0	0	0	0	Introducing global peat-specific temperature and pH calibrations based on brGDGT bacterial lipids								62	35	3	0.0645161
Harz, Odersprung Bog	52.8	10.6	47	2	1	42	0	1	0	1	0	6	0	0	0	0	0	Introducing global peat-specific temperature and pH calibrations based on brGDGT bacterial lipids								50	44	6	0.08
Harz, Odersprung Bog	52.8	10.6	47	2	2	40	0	2	0	1	0	7	0	0	0	0	0	Introducing global peat-specific temperature and pH calibrations based on brGDGT bacterial lipids								51	43	7	0.117647
Harz, Odersprung Bog	52.8	10.6	46	3	2	41	0	2	0	1	0	5	0	0	0	0	0	Introducing global peat-specific temperature and pH calibrations based on brGDGT bacterial lipids								51	44	5	0.137255
Harz, Odersprung Bog	52.8	10.6	54	3	1	34	0	2	0	1	0	5	1	0	0	0	0	Introducing global peat-specific temperature and pH calibrations based on brGDGT bacterial lipids								58	37	6	0.0862069
Harz, Odersprung Bog	52.8	10.6	45	2	1	42	0	2	0	1	0	7	0	0	0	0	0	Introducing global peat-specific temperature and pH calibrations based on brGDGT bacterial lipids								48	45	7	0.0833333
Harz, Odersprung Bog	52.8	10.6	39	3	2	44	0	3	0	2	0	7	0	0	0	0	0	Introducing global peat-specific temperature and pH calibrations based on brGDGT bacterial lipids								44	49	7	0.159091
Harz, Odersprung Bog	52.8	10.6	33	2	2	48	0	3	0	1	0	9	1	0	0	0	0	Introducing global peat-specific temperature and pH calibrations based on brGDGT bacterial lipids								37	52	10	0.162162
Harz, Odersprung Bog	52.8	10.6	34	2	2	48	0	4	0	2	0	8	0	0	0	0	0	Introducing global peat-specific temperature and pH calibrations based on brGDGT bacterial lipids								38	54	8	0.157895
Harz, Odersprung Bog	52.8	10.6	34	3	3	45	0	5	0	3	0	8	0	0	0	0	0	Introducing global peat-specific temperature and pH calibrations based on brGDGT bacterial lipids								40	53	8	0.225
Harz, Odersprung Bog	52.8	10.6	35	3	3	43	0	5	0	2	0	8	0	0	0	0	0	Introducing global peat-specific temperature and pH calibrations based on brGDGT bacterial lipids								41	50	8	0.219512
Harz, Odersprung Bog	52.8	10.6	37	3	2	44	0	4	0	2	0	8	0	0	0	0	0	Introducing global peat-specific temperature and pH calibrations based on brGDGT bacterial lipids								42	50	8	0.166667
Harz, Odersprung Bog	52.8	10.6	38	3	2	42	0	4	0	2	0	9	0	0	0	0	0	Introducing global peat-specific temperature and pH calibrations based on brGDGT bacterial lipids								43	48	9	0.162791
ChÃ©nÃ©ville	45.9	-75	64	2	1	28	0	0	0	0	0	3	0	0	0	0	0	Introducing global peat-specific temperature and pH calibrations based on brGDGT bacterial lipids								67	28	3	0.0597015
ChÃ©nÃ©ville	45.9	-75	57	2	2	33	0	1	0	1	0	4	0	0	0	0	0	Introducing global peat-specific temperature and pH calibrations based on brGDGT bacterial lipids								61	35	4	0.0983607
Parc-des-grands-Jardins	47.6	-71	40	1	0	45	0	1	0	1	0	12	0	0	0	0	0	Introducing global peat-specific temperature and pH calibrations based on brGDGT bacterial lipids								41	47	12	0.0243902
Parc-des-grands-Jardins	47.6	-71	38	1	1	47	0	1	0	1	0	12	0	0	0	0	0	Introducing global peat-specific temperature and pH calibrations based on brGDGT bacterial lipids								40	49	12	0.075
Peace river	56.4	-116.9	43	1	0	46	0	1	0	1	0	8	0	0	0	0	0	Introducing global peat-specific temperature and pH calibrations based on brGDGT bacterial lipids								44	48	8	0.0227273
Peace river	56.4	-116.9	22	3	0	30	7	5	2	1	0	18	10	0	0	0	0	Introducing global peat-specific temperature and pH calibrations based on brGDGT bacterial lipids								25	45	28	0.12
Radisson	53.8	-77.6	39	1	0	45	0	1	0	0	0	13	0	0	0	0	0	Introducing global peat-specific temperature and pH calibrations based on brGDGT bacterial lipids								40	46	13	0.025
Radisson	53.8	-77.6	51	1	1	36	0	1	0	1	0	10	0	0	0	0	0	Introducing global peat-specific temperature and pH calibrations based on brGDGT bacterial lipids								53	38	10	0.0566038
Radisson	53.8	-77.6	32	0	0	49	0	1	0	1	0	17	0	0	0	0	0	Introducing global peat-specific temperature and pH calibrations based on brGDGT bacterial lipids								32	51	17	0
Radisson	53.8	-77.6	32	1	0	47	0	1	0	1	0	17	0	0	0	0	0	Introducing global peat-specific temperature and pH calibrations based on brGDGT bacterial lipids								33	49	17	0.030303
Radisson	53.8	-77.6	35	1	0	46	0	1	0	1	0	17	0	0	0	0	0	Introducing global peat-specific temperature and pH calibrations based on brGDGT bacterial lipids								36	48	17	0.0277778
Sainte-Eulalie	46.1	-72.3	75	2	1	20	0	0	0	0	0	2	0	0	0	0	0	Introducing global peat-specific temperature and pH calibrations based on brGDGT bacterial lipids								78	20	2	0.0512821
Sainte-Eulalie	46.1	-72.3	63	3	2	29	0	1	0	0	0	2	0	0	0	0	0	Introducing global peat-specific temperature and pH calibrations based on brGDGT bacterial lipids								68	30	2	0.102941
Seba beach	53.5	-114.9	56	5	1	32	0	1	0	0	0	5	0	0	0	0	0	Introducing global peat-specific temperature and pH calibrations based on brGDGT bacterial lipids								62	33	5	0.112903
Seba beach	53.5	-114.9	40	1	1	48	0	1	0	1	0	9	0	0	0	0	0	Introducing global peat-specific temperature and pH calibrations based on brGDGT bacterial lipids								42	50	9	0.0714286
Shippagan 527	47.7	-64.7	70	3	1	25	0	1	0	0	0	2	0	0	0	0	0	Introducing global peat-specific temperature and pH calibrations based on brGDGT bacterial lipids								74	26	2	0.0675676
Shippagan 527	47.7	-64.7	67	2	1	27	0	0	0	0	0	2	0	0	0	0	0	Introducing global peat-specific temperature and pH calibrations based on brGDGT bacterial lipids								70	27	2	0.0571429
SS70-14	60.9	-116.8	8	7	1	13	19	7	11	0	1	32	0	0	0	0	0	Introducing global peat-specific temperature and pH calibrations based on brGDGT bacterial lipids								16	51	32	0.5625
SS70-14	60.9	-116.8	11	9	1	15	20	6	8	0	1	13	13	1	1	0	1	Introducing global peat-specific temperature and pH calibrations based on brGDGT bacterial lipids								21	50	29	0.52381
Waswanipi	49.7	-76	69	2	1	26	0	0	0	0	0	2	0	0	0	0	0	Introducing global peat-specific temperature and pH calibrations based on brGDGT bacterial lipids								72	26	2	0.0555556
Waswanipi	49.7	-76	61	2	1	32	0	1	0	0	0	4	0	0	0	0	0	Introducing global peat-specific temperature and pH calibrations based on brGDGT bacterial lipids								64	33	4	0.0625
Waswanipi	49.7	-76	59	2	1	33	0	1	0	0	0	3	0	0	0	0	0	Introducing global peat-specific temperature and pH calibrations based on brGDGT bacterial lipids								62	34	3	0.0645161
007G	56.7	-5.8	51	3	2	38	0	1	0	1	0	5	0	0	0	0	0	Introducing global peat-specific temperature and pH calibrations based on brGDGT bacterial lipids								56	40	5	0.125
007G	56.7	-5.8	52	3	1	37	0	1	0	0	0	6	0	0	0	0	0	Introducing global peat-specific temperature and pH calibrations based on brGDGT bacterial lipids								56	38	6	0.0892857
007G	56.7	-5.8	51	3	2	37	0	1	0	1	0	5	0	0	0	0	0	Introducing global peat-specific temperature and pH calibrations based on brGDGT bacterial lipids								56	39	5	0.125
007G	56.7	-5.8	42	4	3	43	0	2	0	1	0	6	0	0	0	0	0	Introducing global peat-specific temperature and pH calibrations based on brGDGT bacterial lipids								49	46	6	0.204082
007G	56.7	-5.8	42	4	3	41	0	2	0	1	0	7	0	0	0	0	0	Introducing global peat-specific temperature and pH calibrations based on brGDGT bacterial lipids								49	44	7	0.204082
007G	56.7	-5.8	38	5	3	44	0	2	0	1	0	7	0	0	0	0	0	Introducing global peat-specific temperature and pH calibrations based on brGDGT bacterial lipids								46	47	7	0.23913
007G	56.7	-5.8	40	4	2	43	0	3	0	1	0	8	0	0	0	0	0	Introducing global peat-specific temperature and pH calibrations based on brGDGT bacterial lipids								46	47	8	0.173913
007G	56.7	-5.8	40	3	2	43	0	2	0	1	0	8	0	0	0	0	0	Introducing global peat-specific temperature and pH calibrations based on brGDGT bacterial lipids								45	46	8	0.155556
007G	56.7	-5.8	37	3	2	48	0	2	0	1	0	7	0	0	0	0	0	Introducing global peat-specific temperature and pH calibrations based on brGDGT bacterial lipids								42	51	7	0.166667
004D	56.7	-5.8	51	2	1	37	0	1	0	1	0	8	0	0	0	0	0	Introducing global peat-specific temperature and pH calibrations based on brGDGT bacterial lipids								54	39	8	0.0740741
004D	56.7	-5.8	52	4	1	37	0	1	0	1	0	5	0	0	0	0	0	Introducing global peat-specific temperature and pH calibrations based on brGDGT bacterial lipids								57	39	5	0.105263
004D	56.7	-5.8	45	4	2	47	0	1	0	1	0	0	0	0	0	0	0	Introducing global peat-specific temperature and pH calibrations based on brGDGT bacterial lipids								51	49	0	0.156863
004D	56.7	-5.8	46	3	1	43	0	1	0	1	0	4	0	0	0	0	0	Introducing global peat-specific temperature and pH calibrations based on brGDGT bacterial lipids								50	45	4	0.1
004D	56.7	-5.8	49	2	1	42	0	1	0	0	0	4	0	0	0	0	0	Introducing global peat-specific temperature and pH calibrations based on brGDGT bacterial lipids								52	43	4	0.0769231
004D	56.7	-5.8	45	4	2	44	0	1	0	0	0	4	0	0	0	0	0	Introducing global peat-specific temperature and pH calibrations based on brGDGT bacterial lipids								51	45	4	0.156863
004D	56.7	-5.8	41	3	1	48	0	1	0	0	0	5	0	0	0	0	0	Introducing global peat-specific temperature and pH calibrations based on brGDGT bacterial lipids								45	49	5	0.111111
004D	56.7	-5.8	38	3	2	50	0	2	0	0	0	6	0	0	0	0	0	Introducing global peat-specific temperature and pH calibrations based on brGDGT bacterial lipids								43	52	6	0.162791
004D	56.7	-5.8	40	4	1	45	0	3	0	0	0	6	0	0	0	0	0	Introducing global peat-specific temperature and pH calibrations based on brGDGT bacterial lipids								45	48	6	0.133333
004D	56.7	-5.8	38	3	2	48	0	2	0	0	0	7	0	0	0	0	0	Introducing global peat-specific temperature and pH calibrations based on brGDGT bacterial lipids								43	50	7	0.162791
004D	56.7	-5.8	41	4	1	46	0	3	0	0	0	5	0	0	0	0	0	Introducing global peat-specific temperature and pH calibrations based on brGDGT bacterial lipids								46	49	5	0.130435
001A	56.7	-5.8	43	3	2	41	0	2	1	1	0	6	2	0	0	0	0	Introducing global peat-specific temperature and pH calibrations based on brGDGT bacterial lipids								48	45	8	0.145833
001A	56.7	-5.8	40	4	1	36	6	2	1	1	0	6	2	0	0	0	0	Introducing global peat-specific temperature and pH calibrations based on brGDGT bacterial lipids								45	46	8	0.133333
001A	56.7	-5.8	45	4	2	39	0	2	1	1	0	6	1	0	0	0	0	Introducing global peat-specific temperature and pH calibrations based on brGDGT bacterial lipids								51	43	7	0.156863
001A	56.7	-5.8	42	4	1	42	0	2	0	1	0	6	1	0	0	0	0	Introducing global peat-specific temperature and pH calibrations based on brGDGT bacterial lipids								47	45	7	0.12766
001A	56.7	-5.8	43	4	2	41	0	2	0	1	0	6	1	0	0	0	0	Introducing global peat-specific temperature and pH calibrations based on brGDGT bacterial lipids								49	44	7	0.163265
001A	56.7	-5.8	44	3	2	39	0	2	0	1	0	7	1	0	0	0	0	Introducing global peat-specific temperature and pH calibrations based on brGDGT bacterial lipids								49	42	8	0.142857
001A	56.7	-5.8	46	4	2	38	0	2	0	1	0	7	1	0	0	0	0	Introducing global peat-specific temperature and pH calibrations based on brGDGT bacterial lipids								52	41	8	0.153846
001A	56.7	-5.8	45	3	2	41	0	2	0	1	0	6	1	0	0	0	0	Introducing global peat-specific temperature and pH calibrations based on brGDGT bacterial lipids								50	44	7	0.14
001A	56.7	-5.8	44	3	1	33	7	2	1	1	0	8	2	0	0	0	0	Introducing global peat-specific temperature and pH calibrations based on brGDGT bacterial lipids								48	44	10	0.104167
001A	56.7	-5.8	39	3	1	37	6	2	1	1	0	8	2	0	0	0	0	Introducing global peat-specific temperature and pH calibrations based on brGDGT bacterial lipids								43	47	10	0.116279
M3	56.7	-5.8	40	1	2	34	14	0	0	0	0	8	0	0	0	0	0	Introducing global peat-specific temperature and pH calibrations based on brGDGT bacterial lipids								43	48	8	0.116279
M3	56.7	-5.8	57	1	2	33	0	1	0	1	0	5	0	0	0	0	0	Introducing global peat-specific temperature and pH calibrations based on brGDGT bacterial lipids								60	35	5	0.0833333
M3	56.7	-5.8	53	2	3	35	0	1	0	1	0	5	0	0	0	0	0	Introducing global peat-specific temperature and pH calibrations based on brGDGT bacterial lipids								58	37	5	0.137931
M3	56.7	-5.8	48	3	3	38	0	1	0	1	0	6	0	0	0	0	0	Introducing global peat-specific temperature and pH calibrations based on brGDGT bacterial lipids								54	40	6	0.166667
M3	56.7	-5.8	45	3	3	40	0	1	0	1	0	7	0	0	0	0	0	Introducing global peat-specific temperature and pH calibrations based on brGDGT bacterial lipids								51	42	7	0.176471
M3	56.7	-5.8	45	3	2	39	0	2	0	1	0	7	0	0	0	0	0	Introducing global peat-specific temperature and pH calibrations based on brGDGT bacterial lipids								50	42	7	0.14
M3	56.7	-5.8	48	3	2	37	0	2	0	1	0	7	0	0	0	0	0	Introducing global peat-specific temperature and pH calibrations based on brGDGT bacterial lipids								53	40	7	0.132075
M3	56.7	-5.8	50	3	3	34	0	2	0	1	0	6	0	0	0	0	0	Introducing global peat-specific temperature and pH calibrations based on brGDGT bacterial lipids								56	37	6	0.160714
M3	56.7	-5.8	44	5	4	29	8	2	1	1	0	5	1	0	0	0	0	Introducing global peat-specific temperature and pH calibrations based on brGDGT bacterial lipids								53	41	6	0.245283
M2	56.7	-5.8	51	3	2	37	0	2	0	1	0	4	0	0	0	0	0	Introducing global peat-specific temperature and pH calibrations based on brGDGT bacterial lipids								56	40	4	0.125
M2	56.7	-5.8	48	3	2	39	0	1	0	1	0	5	0	0	0	0	0	Introducing global peat-specific temperature and pH calibrations based on brGDGT bacterial lipids								53	41	5	0.132075
M2	56.7	-5.8	49	3	1	38	0	1	0	1	0	8	0	0	0	0	0	Introducing global peat-specific temperature and pH calibrations based on brGDGT bacterial lipids								53	40	8	0.0943396
M2	56.7	-5.8	40	2	2	41	0	1	0	0	1	13	0	0	0	0	0	Introducing global peat-specific temperature and pH calibrations based on brGDGT bacterial lipids								44	43	13	0.136364
M2	56.7	-5.8	56	3	1	33	0	1	0	1	0	5	0	0	0	0	0	Introducing global peat-specific temperature and pH calibrations based on brGDGT bacterial lipids								60	35	5	0.0833333
M2	56.7	-5.8	59	3	1	30	0	1	0	1	0	4	0	0	0	0	0	Introducing global peat-specific temperature and pH calibrations based on brGDGT bacterial lipids								63	32	4	0.0793651
M2	56.7	-5.8	56	4	1	32	0	1	0	1	0	5	0	0	0	0	0	Introducing global peat-specific temperature and pH calibrations based on brGDGT bacterial lipids								61	34	5	0.0983607
M2	56.7	-5.8	50	4	2	36	0	2	0	1	0	4	0	0	0	0	0	Introducing global peat-specific temperature and pH calibrations based on brGDGT bacterial lipids								56	39	4	0.142857
M2	56.7	-5.8	37	5	2	44	0	4	0	0	0	8	0	0	0	0	0	Introducing global peat-specific temperature and pH calibrations based on brGDGT bacterial lipids								44	48	8	0.204545
M2	56.7	-5.8	34	5	1	45	0	4	0	0	0	10	0	0	0	0	0	Introducing global peat-specific temperature and pH calibrations based on brGDGT bacterial lipids								40	49	10	0.175
M4	56.7	-5.8	54	2	2	38	0	0	0	0	0	4	0	0	0	0	0	Introducing global peat-specific temperature and pH calibrations based on brGDGT bacterial lipids								58	38	4	0.103448
M4	56.7	-5.8	54	2	2	35	0	1	0	1	0	5	0	0	0	0	0	Introducing global peat-specific temperature and pH calibrations based on brGDGT bacterial lipids								58	37	5	0.103448
M4	56.7	-5.8	55	2	1	34	0	1	0	1	0	6	0	0	0	0	0	Introducing global peat-specific temperature and pH calibrations based on brGDGT bacterial lipids								58	36	6	0.0689655
M4	56.7	-5.8	54	2	1	36	0	1	0	1	0	6	0	0	0	0	0	Introducing global peat-specific temperature and pH calibrations based on brGDGT bacterial lipids								57	38	6	0.0701754
M4	56.7	-5.8	51	2	2	38	0	1	0	1	0	7	0	0	0	0	0	Introducing global peat-specific temperature and pH calibrations based on brGDGT bacterial lipids								55	40	7	0.109091
M4	56.7	-5.8	55	1	1	36	0	0	0	1	0	6	0	0	0	0	0	Introducing global peat-specific temperature and pH calibrations based on brGDGT bacterial lipids								57	37	6	0.0526316
M4	56.7	-5.8	53	1	1	37	0	0	0	1	0	6	0	0	0	0	0	Introducing global peat-specific temperature and pH calibrations based on brGDGT bacterial lipids								55	38	6	0.0545455
M4	56.7	-5.8	59	1	1	32	0	0	0	1	0	6	0	0	0	0	0	Introducing global peat-specific temperature and pH calibrations based on brGDGT bacterial lipids								61	33	6	0.0491803
M4	56.7	-5.8	53	2	2	36	0	1	0	1	0	5	0	0	0	0	0	Introducing global peat-specific temperature and pH calibrations based on brGDGT bacterial lipids								57	38	5	0.105263
M4	56.7	-5.8	51	2	2	38	0	1	0	1	0	5	0	0	0	0	0	Introducing global peat-specific temperature and pH calibrations based on brGDGT bacterial lipids								55	40	5	0.109091
M1	56.7	-5.8	40	3	0	33	8	2	1	1	0	12	0	0	0	0	0	Introducing global peat-specific temperature and pH calibrations based on brGDGT bacterial lipids								43	45	12	0.0697674
M1	56.7	-5.8	42	4	1	43	0	2	0	1	0	8	0	0	0	0	0	Introducing global peat-specific temperature and pH calibrations based on brGDGT bacterial lipids								47	46	8	0.12766
M1	56.7	-5.8	46	4	1	33	7	2	1	1	0	6	1	0	0	0	0	Introducing global peat-specific temperature and pH calibrations based on brGDGT bacterial lipids								51	44	7	0.117647
M1	56.7	-5.8	42	4	1	44	0	2	0	1	0	6	0	0	0	0	0	Introducing global peat-specific temperature and pH calibrations based on brGDGT bacterial lipids								47	47	6	0.12766
M1	56.7	-5.8	38	6	1	34	9	3	0	1	0	6	2	0	0	0	0	Introducing global peat-specific temperature and pH calibrations based on brGDGT bacterial lipids								45	47	8	0.177778
M1	56.7	-5.8	35	7	1	24	17	3	1	1	0	6	4	0	0	0	0	Introducing global peat-specific temperature and pH calibrations based on brGDGT bacterial lipids								43	46	10	0.209302
M1	56.7	-5.8	32	7	1	23	20	3	2	1	0	6	4	0	0	0	0	Introducing global peat-specific temperature and pH calibrations based on brGDGT bacterial lipids								40	49	10	0.225
M1	56.7	-5.8	30	9	2	28	10	3	3	1	0	9	4	0	0	0	0	Introducing global peat-specific temperature and pH calibrations based on brGDGT bacterial lipids								41	45	13	0.317073
M1	56.7	-5.8	29	9	2	28	10	4	3	1	0	11	3	0	0	0	0	Introducing global peat-specific temperature and pH calibrations based on brGDGT bacterial lipids								40	46	14	0.325
009I	56.7	-5.8	56	2	1	36	0	1	0	0	0	5	0	0	0	0	0	Introducing global peat-specific temperature and pH calibrations based on brGDGT bacterial lipids								59	37	5	0.0677966
009I	56.7	-5.8	49	2	1	41	0	1	0	0	0	6	0	0	0	0	0	Introducing global peat-specific temperature and pH calibrations based on brGDGT bacterial lipids								52	42	6	0.0769231
009I	56.7	-5.8	51	4	1	38	0	1	0	1	0	5	0	0	0	0	0	Introducing global peat-specific temperature and pH calibrations based on brGDGT bacterial lipids								56	40	5	0.107143
009I	56.7	-5.8	48	4	1	41	0	1	0	1	0	4	0	0	0	0	0	Introducing global peat-specific temperature and pH calibrations based on brGDGT bacterial lipids								53	43	4	0.113208
009I	56.7	-5.8	45	4	1	42	0	2	0	1	0	5	0	0	0	0	0	Introducing global peat-specific temperature and pH calibrations based on brGDGT bacterial lipids								50	45	5	0.12
009I	56.7	-5.8	46	4	1	41	0	2	0	1	0	5	0	0	0	0	0	Introducing global peat-specific temperature and pH calibrations based on brGDGT bacterial lipids								51	44	5	0.117647
009I	56.7	-5.8	41	5	1	41	0	3	0	1	0	7	0	0	0	0	0	Introducing global peat-specific temperature and pH calibrations based on brGDGT bacterial lipids								47	45	7	0.148936
009I	56.7	-5.8	43	6	2	40	0	4	0	1	0	5	0	0	0	0	0	Introducing global peat-specific temperature and pH calibrations based on brGDGT bacterial lipids								51	45	5	0.196078
009I	56.7	-5.8	41	5	1	42	0	4	0	1	0	6	0	0	0	0	0	Introducing global peat-specific temperature and pH calibrations based on brGDGT bacterial lipids								47	47	6	0.148936
009I	56.7	-5.8	39	6	1	43	0	4	0	1	0	6	0	0	0	0	0	Introducing global peat-specific temperature and pH calibrations based on brGDGT bacterial lipids								46	48	6	0.173913
Fallahogy Bog	54.8	-6.6	76	1	0	20	0	1	0	1	0	2	0	0	0	0	0	Introducing global peat-specific temperature and pH calibrations based on brGDGT bacterial lipids								77	22	2	0.012987
Fallahogy Bog	54.8	-6.6	70	1	0	25	0	1	0	1	0	2	0	0	0	0	0	Introducing global peat-specific temperature and pH calibrations based on brGDGT bacterial lipids								71	27	2	0.0140845
Fallahogy Bog	54.8	-6.6	56	3	1	34	0	1	0	1	0	5	0	0	0	0	0	Introducing global peat-specific temperature and pH calibrations based on brGDGT bacterial lipids								60	36	5	0.0833333
Fallahogy Bog	54.8	-6.6	55	3	2	31	0	2	0	1	0	6	0	0	0	0	0	Introducing global peat-specific temperature and pH calibrations based on brGDGT bacterial lipids								60	34	6	0.116667
Fallahogy Bog	54.8	-6.6	41	3	3	43	0	2	0	1	0	7	0	0	0	0	0	Introducing global peat-specific temperature and pH calibrations based on brGDGT bacterial lipids								47	46	7	0.191489
Fallahogy Bog	54.8	-6.6	38	4	3	44	0	3	0	1	0	7	0	0	0	0	0	Introducing global peat-specific temperature and pH calibrations based on brGDGT bacterial lipids								45	48	7	0.222222
Lake																										Tetramethylated%	Pentamethylated%	Hexamethylated%
Namtso 1	30.72	90.64	4	2	2	3	9	2	15	0	13	4	29	1	8	0	8	Different temperature dependence of the bacterial brGDGT isomers in 35 Chinese lake sediments compared to that in soils								8	42	50	0.75
Namtso 2	30.78	90.46	4	2	2	3	10	2	15	0	12	5	29	1	8	0	7	Different temperature dependence of the bacterial brGDGT isomers in 36 Chinese lake sediments compared to that in soils								8	42	50	0.75
Lake Hulun	48.95	117.39	15	7	1	9	28	4	10	0	1	6	17	0	1	0	0	Different temperature dependence of the bacterial brGDGT isomers in 37 Chinese lake sediments compared to that in soils								23	52	24	0.391304
Lake Qinghai 1	36.86	100.31	21	7	1	10	22	4	6	1	0	8	19	1	1	0	0	Different temperature dependence of the bacterial brGDGT isomers in 38 Chinese lake sediments compared to that in soils								29	43	29	0.310345
Lake Qinghai 2	36.73	100.31	25	6	1	8	22	4	5	1	1	7	20	1	0	0	0	Different temperature dependence of the bacterial brGDGT isomers in 39 Chinese lake sediments compared to that in soils								32	41	28	0.25
Longquanlongwan a	42.42	126.6	30	9	1	19	18	5	6	1	0	4	6	0	1	0	0	Different temperature dependence of the bacterial brGDGT isomers in 40 Chinese lake sediments compared to that in soils								40	49	11	0.275
Nanlongwan a	42.41	126.48	19	10	2	20	17	6	7	1	0	8	7	0	1	0	0	Different temperature dependence of the bacterial brGDGT isomers in 41 Chinese lake sediments compared to that in soils								31	51	16	0.451613
Erlongwan a	42.3	126.38	34	7	1	25	15	3	3	1	0	5	5	0	0	0	0	Different temperature dependence of the bacterial brGDGT isomers in 42 Chinese lake sediments compared to that in soils								42	47	10	0.214286
Dalongwan a	42.34	126.39	21	8	1	26	16	6	4	0	0	8	8	0	1	0	0	Different temperature dependence of the bacterial brGDGT isomers in 43 Chinese lake sediments compared to that in soils								30	52	17	0.333333
Daihai 1	40.58	112.67	11	25	9	7	11	8	9	2	0	4	11	1	1	1	0	Different temperature dependence of the bacterial brGDGT isomers in 44 Chinese lake sediments compared to that in soils								45	37	18	0.955556
Daihai 2	40.58	112.66	14	12	4	10	20	9	9	1	0	6	12	1	1	0	0	Different temperature dependence of the bacterial brGDGT isomers in 45 Chinese lake sediments compared to that in soils								30	49	20	0.666667
Daihai 3	40.59	112.65	14	12	4	10	22	7	10	1	0	6	11	1	1	0	0	Different temperature dependence of the bacterial brGDGT isomers in 46 Chinese lake sediments compared to that in soils								30	50	19	0.666667
Lake Chagan	45.21	124.33	14	8	1	11	28	5	9	1	0	7	14	1	1	0	0	Different temperature dependence of the bacterial brGDGT isomers in 47 Chinese lake sediments compared to that in soils								23	54	23	0.434783
Wuliangsuhai	40.87	108.78	15	6	0	6	29	4	12	0	0	6	18	1	2	0	0	Different temperature dependence of the bacterial brGDGT isomers in 48 Chinese lake sediments compared to that in soils								21	51	27	0.285714
Lake Wolong	42.75	123.29	15	7	1	18	25	4	7	0	0	9	14	0	1	0	0	Different temperature dependence of the bacterial brGDGT isomers in 49 Chinese lake sediments compared to that in soils								23	54	24	0.391304
Cetian	39.97	113.77	15	7	1	12	26	6	8	1	1	10	11	1	1	0	0	Different temperature dependence of the bacterial brGDGT isomers in 50 Chinese lake sediments compared to that in soils								23	54	23	0.391304
Lake zhenzhu	41.74	122.86	19	10	2	17	25	6	4	1	0	8	8	0	0	0	0	Different temperature dependence of the bacterial brGDGT isomers in 51 Chinese lake sediments compared to that in soils								31	53	16	0.451613
Guanting	40.37	115.76	13	8	1	14	23	9	7	1	0	10	12	1	1	0	0	Different temperature dependence of the bacterial brGDGT isomers in 52 Chinese lake sediments compared to that in soils								22	54	24	0.454545
Yuqiao	40.03	117.52	18	10	1	15	21	8	6	1	0	8	10	1	1	0	0	Different temperature dependence of the bacterial brGDGT isomers in 53 Chinese lake sediments compared to that in soils								29	51	20	0.413793
Xidayang	38.75	114.77	20	10	1	11	26	5	9	0	0	4	9	1	2	0	0	Different temperature dependence of the bacterial brGDGT isomers in 54 Chinese lake sediments compared to that in soils								31	51	16	0.387097
Baiyangdian	38.93	115.99	22	12	2	16	18	8	6	1	0	5	8	1	1	0	0	Different temperature dependence of the bacterial brGDGT isomers in 55 Chinese lake sediments compared to that in soils								36	49	15	0.444444
Lake Hengshui	37.63	115.62	20	10	1	15	19	7	7	0	0	7	10	1	2	0	0	Different temperature dependence of the bacterial brGDGT isomers in 56 Chinese lake sediments compared to that in soils								31	48	20	0.387097
Lake Dongping	35.96	116.2	18	13	2	17	16	12	5	1	0	6	7	1	1	0	0	Different temperature dependence of the bacterial brGDGT isomers in 57 Chinese lake sediments compared to that in soils								33	51	15	0.515152
Fenghe b	34.33	108.74	20	12	2	12	19	6	10	1	1	4	10	1	1	0	0	Different temperature dependence of the bacterial brGDGT isomers in 58 Chinese lake sediments compared to that in soils								34	49	16	0.470588
Lake Dushan	35.08	116.77	20	11	2	15	19	9	6	1	0	6	9	1	1	0	0	Different temperature dependence of the bacterial brGDGT isomers in 59 Chinese lake sediments compared to that in soils								33	50	17	0.454545
Lake Luoma	34.07	118.16	20	10	1	13	23	8	8	1	0	5	10	1	1	0	0	Different temperature dependence of the bacterial brGDGT isomers in 60 Chinese lake sediments compared to that in soils								31	53	17	0.387097
Lake Hongze	33.31	118.75	17	16	4	13	11	10	12	1	2	5	6	1	2	0	0	Different temperature dependence of the bacterial brGDGT isomers in 61 Chinese lake sediments compared to that in soils								37	49	14	0.648649
Lake Weishan	34.61	117.26	20	12	2	18	15	11	5	1	0	6	7	1	1	0	0	Different temperature dependence of the bacterial brGDGT isomers in 62 Chinese lake sediments compared to that in soils								34	50	15	0.470588
Lake Gaoyou	32.82	119.35	19	15	3	15	12	10	10	1	1	5	6	1	1	0	0	Different temperature dependence of the bacterial brGDGT isomers in 63 Chinese lake sediments compared to that in soils								37	49	13	0.567568
Lake Changdang	31.63	119.57	21	15	3	19	12	12	4	1	0	5	5	1	1	0	0	Different temperature dependence of the bacterial brGDGT isomers in 64 Chinese lake sediments compared to that in soils								39	48	12	0.538462
Lake Shijiu	31.5	118.94	21	15	3	17	14	11	5	1	0	5	7	1	1	0	0	Different temperature dependence of the bacterial brGDGT isomers in 65 Chinese lake sediments compared to that in soils								39	48	14	0.538462
Lake Yangcheng	31.43	120.8	21	14	2	19	12	12	5	1	0	6	6	1	1	0	0	Different temperature dependence of the bacterial brGDGT isomers in 66 Chinese lake sediments compared to that in soils								37	49	14	0.486486
Lake Chang	30.44	112.45	18	14	3	14	18	11	8	1	0	5	6	1	1	0	0	Different temperature dependence of the bacterial brGDGT isomers in 67 Chinese lake sediments compared to that in soils								35	52	13	0.571429
Lake Caizi	30.79	117.1	26	15	2	19	13	9	4	1	0	5	4	1	0	0	0	Different temperature dependence of the bacterial brGDGT isomers in 68 Chinese lake sediments compared to that in soils								43	46	10	0.44186
Lake Chao	31.57	117.67	22	16	3	19	10	11	6	1	1	5	4	1	1	0	0	Different temperature dependence of the bacterial brGDGT isomers in 69 Chinese lake sediments compared to that in soils								41	48	11	0.536585
Lake Hong	29.9	113.4	21	13	2	14	16	11	6	1	0	5	8	1	1	0	0	Different temperature dependence of the bacterial brGDGT isomers in 70 Chinese lake sediments compared to that in soils								36	48	15	0.472222
Lake Wuchang	30.27	116.69	25	18	3	18	10	11	5	1	0	4	3	1	0	0	0	Different temperature dependence of the bacterial brGDGT isomers in 71 Chinese lake sediments compared to that in soils								46	45	8	0.521739
Lake Liangzi	30.23	114.6	22	16	3	18	12	11	5	1	0	6	4	1	1	0	0	Different temperature dependence of the bacterial brGDGT isomers in 72 Chinese lake sediments compared to that in soils								41	47	12	0.536585
Lake Longgan	29.92	116.11	26	16	3	17	11	9	6	1	1	4	4	1	1	0	0	Different temperature dependence of the bacterial brGDGT isomers in 73 Chinese lake sediments compared to that in soils								45	45	10	0.488889
IM1	48.25	118.417	18.5	5.9	1.8	29.8	13.3	1.4	4.4	0.7	0.5	1.7	19.7	0.5	0.8	0.6	0.3	Distribution of branched tetraether lipids in ponds from Inner Mongolia, NE China: Insight into the source of brGDGTs								26.2	50.1	23.6	0.362595
IM2	48.2333	118.433	20.6	9.2	4.7	7.2	27	4.8	7.3	0.9	1.6	1.4	15	0.1	0.2	0	0	Distribution of branched tetraether lipids in ponds from Inner Mongolia, NE China: Insight into the source of brGDGTs								34.5	48.8	16.7	0.53913
IM3	48.3	118.533	8.2	2.3	0.8	14.5	15.8	0.8	2.5	0.1	0.3	8.1	45.8	0.2	0.7	0	0	Distribution of branched tetraether lipids in ponds from Inner Mongolia, NE China: Insight into the source of brGDGTs								11.3	34	54.8	0.345133
IM4	48.3	118.533	27.3	5.1	1.1	12.2	28.1	2.9	4.4	0.5	0.5	2.2	12.5	0.8	1	0.3	1.1	Distribution of branched tetraether lipids in ponds from Inner Mongolia, NE China: Insight into the source of brGDGTs								33.5	48.6	17.9	0.21791
IM5	48.2333	118.45	17.7	5.3	0.7	19	24.8	2.6	7.1	0.2	0.5	4.9	16.1	0.6	0	0.1	0.3	Distribution of branched tetraether lipids in ponds from Inner Mongolia, NE China: Insight into the source of brGDGTs								23.7	54.2	22	0.2827
IM6	48.8833	118.083	20	4.7	2.3	8.6	33.3	4.1	4.5	0.4	0.1	3.6	18	0.4	0	0	0	Distribution of branched tetraether lipids in ponds from Inner Mongolia, NE China: Insight into the source of brGDGTs								27	51	22	0.344444
IM7	48.2667	118.65	19.8	3.8	1.2	12	38.8	2.7	3.4	0.3	0.5	3.2	13.2	0.1	0.6	0.2	0	Distribution of branched tetraether lipids in ponds from Inner Mongolia, NE China: Insight into the source of brGDGTs								24.8	57.7	17.3	0.25
IM8	48.3833	118.7	14.8	6.8	2.5	30.6	17.9	2.2	6.8	1	1.1	1.1	14.4	0.3	0.4	0.1	0.1	Distribution of branched tetraether lipids in ponds from Inner Mongolia, NE China: Insight into the source of brGDGTs								24.1	59.6	16.4	0.489627
IM9	48.3667	118.817	10.6	3.7	0.4	10.3	28.9	3.4	8.6	0.1	0.2	5.2	26.5	0.5	1.6	0	0.1	Distribution of branched tetraether lipids in ponds from Inner Mongolia, NE China: Insight into the source of brGDGTs								14.7	51.5	33.9	0.306122
IM10	48.2	118.417	17.8	3	0.3	35.9	12.7	1.8	4.2	0.1	0.1	2	22.2	0	0	0	0	Distribution of branched tetraether lipids in ponds from Inner Mongolia, NE China: Insight into the source of brGDGTs								21.1	54.8	24.2	0.170616
IM11	48.1667	118.433	18.3	5	1.4	11.5	31	2.9	4.4	0.4	0.5	6.1	17.2	0.4	0.3	0.2	0.4	Distribution of branched tetraether lipids in ponds from Inner Mongolia, NE China: Insight into the source of brGDGTs								24.7	50.7	24.6	0.315789
Albert	1.683	30.917	33.2237	5.20254	1.27555	4.05165	39.9716	0.958409	3.362	0.17431	0.21897	0.883494	10.6778	0	0	0	0	Distributions of 5- and 6-methyl branched glycerol dialkyl glycerol tetraethers (brGDGTs) in East African lake sediment: Effects of temperature, pH, and new lacustrine paleotemperature calibrations								39.7018	48.7369	11.5613	0.195297
Alice	-0.076	37.465	15.9609	1.98897	0.495235	30.3788	13.0241	2.82181	1.79016	0	0	24.1113	9.42869	0	0	0	0	Distributions of 5- and 7-methyl branched glycerol dialkyl glycerol tetraethers (brGDGTs) in East African lake sediment: Effects of temperature, pH, and new lacustrine paleotemperature calibrations								18.4451	48.0149	33.54	0.16153
Bandasa	-0.157	37.449	35.9434	4.60868	1.22801	31.8068	10.5169	2.19835	0.732028	0.671852	0	10.1115	1.97135	0.0971259	0.113872	0	0	Distributions of 5- and 8-methyl branched glycerol dialkyl glycerol tetraethers (brGDGTs) in East African lake sediment: Effects of temperature, pH, and new lacustrine paleotemperature calibrations								41.7801	45.926	12.2939	0.169092
Batoda	0.3	29.883	15.8847	0.520643	0.0517349	26.5035	11.483	1.03246	0.0858803	0.273987	0	36.1293	7.84675	0.188033	0	0	0	Distributions of 5- and 9-methyl branched glycerol dialkyl glycerol tetraethers (brGDGTs) in East African lake sediment: Effects of temperature, pH, and new lacustrine paleotemperature calibrations								16.4571	39.3788	44.1641	0.0379236
Bigata	0.307	29.883	18.9421	0.355254	0.117097	36.6618	3.11207	0.919557	0.050967	0.515275	0	36.8275	2.32909	0.0870853	0	0.0821789	0	Distributions of 5- and 10-methyl branched glycerol dialkyl glycerol tetraethers (brGDGTs) in East African lake sediment: Effects of temperature, pH, and new lacustrine paleotemperature calibrations								19.4145	41.2597	39.3259	0.0303613
Bugwagi	-0.2	30.183	34.9425	15.5975	2.12222	13.4697	13.771	7.29232	4.58909	0.813978	0.331012	3.03885	3.45627	0.243838	0.259203	0	0.0725173	Distributions of 5- and 11-methyl branched glycerol dialkyl glycerol tetraethers (brGDGTs) in East African lake sediment: Effects of temperature, pH, and new lacustrine paleotemperature calibrations								52.6622	40.2672	7.07068	0.376777
Bukurungu East	0.4	29.9	22.4314	0.498409	0.275952	39.168	2.3385	1.40736	0.0387695	0.817765	0	31.784	1.23976	0	0	0	0	Distributions of 5- and 12-methyl branched glycerol dialkyl glycerol tetraethers (brGDGTs) in East African lake sediment: Effects of temperature, pH, and new lacustrine paleotemperature calibrations								23.2058	43.7704	33.0238	0.0452608
Chibwera	-0.15	30.15	41.8181	12.9905	2.81291	11.2245	13.5842	5.63691	5.2298	0.724649	0.247387	2.77857	2.95251	0	0	0	0	Distributions of 5- and 13-methyl branched glycerol dialkyl glycerol tetraethers (brGDGTs) in East African lake sediment: Effects of temperature, pH, and new lacustrine paleotemperature calibrations								57.6215	36.6474	5.73108	0.323079
Edward	-0.246	29.75	26.6727	10.9972	2.35334	15.9574	15.7631	9.41793	3.0372	1.99333	0.248925	6.57303	6.39708	0.248874	0.231783	0.0383569	0.0697306	Distributions of 5- and 14-methyl branched glycerol dialkyl glycerol tetraethers (brGDGTs) in East African lake sediment: Effects of temperature, pH, and new lacustrine paleotemperature calibrations								40.0232	46.4179	13.5588	0.392369
Eldoret Nakuru 2	0.361	35.351	47.4737	4.60715	0.790834	15.8778	16.5742	1.59098	1.61948	0	0	6.90614	4.55974	0	0	0	0	Distributions of 5- and 15-methyl branched glycerol dialkyl glycerol tetraethers (brGDGTs) in East African lake sediment: Effects of temperature, pH, and new lacustrine paleotemperature calibrations								52.8717	35.6625	11.4659	0.117054
Enchanted	-0.172	37.336	11.2045	2.73023	0.980586	23.9213	6.49485	7.94809	0.449831	0.958592	0.958592	36.105	7.62511	0.623314	0	0	0	Distributions of 5- and 16-methyl branched glycerol dialkyl glycerol tetraethers (brGDGTs) in East African lake sediment: Effects of temperature, pH, and new lacustrine paleotemperature calibrations								14.9153	40.7313	44.3534	0.314536
Gallery Tarn	-0.164	37.325	14.7218	3.05844	0.303333	25.9788	15.5011	2.93826	2.51617	1.10902	0	26.4142	7.45886	0	0	0	0	Distributions of 5- and 17-methyl branched glycerol dialkyl glycerol tetraethers (brGDGTs) in East African lake sediment: Effects of temperature, pH, and new lacustrine paleotemperature calibrations								18.0836	48.0433	33.8731	0.202676
Hanging Tarn	-0.156	37.333	15.6794	2.68551	0.768592	27.8405	5.82817	7.2275	0.218702	1.35086	0	34.8825	2.95406	0.564155	0	0	0	Distributions of 5- and 18-methyl branched glycerol dialkyl glycerol tetraethers (brGDGTs) in East African lake sediment: Effects of temperature, pH, and new lacustrine paleotemperature calibrations								19.1335	42.4658	38.4007	0.220696
Harris Tarn	-0.151	37.319	11.2615	0.322008	0.0364642	32.0562	6.64322	0.182664	0.374682	0	0	38.7062	10.2057	0.143555	0.067655	0	0	Distributions of 5- and 19-methyl branched glycerol dialkyl glycerol tetraethers (brGDGTs) in East African lake sediment: Effects of temperature, pH, and new lacustrine paleotemperature calibrations								11.62	39.2568	49.1232	0.0339876
Hausburg Tarn	-0.145	37.301	14.5408	3.16182	1.99651	32.7101	3.07331	8.95355	0.33329	0.956632	0	30.0597	4.21431	0	0	0	0	Distributions of 5- and 20-methyl branched glycerol dialkyl glycerol tetraethers (brGDGTs) in East African lake sediment: Effects of temperature, pH, and new lacustrine paleotemperature calibrations								19.6991	46.0268	34.274	0.363206
Hut Tarn	-0.157	37.299	16.5504	1.69743	0.532558	31.2437	7.83973	5.64009	0.224891	1.17254	0	29.5848	5.51387	0	0	0	0	Distributions of 5- and 21-methyl branched glycerol dialkyl glycerol tetraethers (brGDGTs) in East African lake sediment: Effects of temperature, pH, and new lacustrine paleotemperature calibrations								18.7804	46.1209	35.0986	0.147097
Ibamba	-0.2	30.2	57.971	6.18417	1.47367	19.142	8.4178	1.54685	0.639073	0.252805	0	3.43398	0.938609	0	0	0	0	Distributions of 5- and 22-methyl branched glycerol dialkyl glycerol tetraethers (brGDGTs) in East African lake sediment: Effects of temperature, pH, and new lacustrine paleotemperature calibrations								65.6289	29.9985	4.37259	0.139139
Irene	0.383	29.883	7.25628	0.213497	0.00390965	15.5359	6.48423	0.469349	0.0967331	0	0	58.8692	11.071	0	0	0	0	Distributions of 5- and 23-methyl branched glycerol dialkyl glycerol tetraethers (brGDGTs) in East African lake sediment: Effects of temperature, pH, and new lacustrine paleotemperature calibrations								7.47369	22.5862	69.9401	0.0296127
Kacuba	-0.333	30.017	37.8457	10.3915	2.94391	12.8825	16.699	5.67833	3.802	0.879923	0	3.66761	5.20939	0	0	0	0	Distributions of 5- and 24-methyl branched glycerol dialkyl glycerol tetraethers (brGDGTs) in East African lake sediment: Effects of temperature, pH, and new lacustrine paleotemperature calibrations								51.1812	39.9418	8.877	0.318073
Kako	-0.3	30.1	41.0308	10.3425	1.75626	11.7449	19.2099	3.54388	4.93277	0.400063	0	2.81295	4.22597	0	0	0	0	Distributions of 5- and 25-methyl branched glycerol dialkyl glycerol tetraethers (brGDGTs) in East African lake sediment: Effects of temperature, pH, and new lacustrine paleotemperature calibrations								53.1296	39.8315	7.03891	0.260778
Kamweru	-0.25	30.117	44.4803	7.46601	0.760081	15.2314	18.549	2.23414	2.94207	0	0	2.88592	5.45105	0	0	0	0	Distributions of 5- and 26-methyl branched glycerol dialkyl glycerol tetraethers (brGDGTs) in East African lake sediment: Effects of temperature, pH, and new lacustrine paleotemperature calibrations								52.7064	38.9566	8.33697	0.170495
Kanyabutetere	0.417	30.283	38.2216	10.4654	2.21128	14.793	17.731	2.82057	4.86394	0.226889	0.17912	3.43492	4.74593	0	0.30624	0	0	Distributions of 5- and 27-methyl branched glycerol dialkyl glycerol tetraethers (brGDGTs) in East African lake sediment: Effects of temperature, pH, and new lacustrine paleotemperature calibrations								50.8984	40.6146	8.48709	0.292505
Kanyanchu	0.433	30.317	33.7313	8.54796	1.779	9.81156	22.7549	4.1803	6.17719	0.403089	0.227968	3.05548	8.58461	0.228372	0.518269	0	0	Distributions of 5- and 28-methyl branched glycerol dialkyl glycerol tetraethers (brGDGTs) in East African lake sediment: Effects of temperature, pH, and new lacustrine paleotemperature calibrations								44.0582	43.555	12.3867	0.274772
Kasirya	-0.25	30.133	40.1412	10.6303	1.53153	12.0006	18.9242	3.67722	4.52502	0.318114	0.311382	2.38029	5.22423	0	0.335966	0	0	Distributions of 5- and 29-methyl branched glycerol dialkyl glycerol tetraethers (brGDGTs) in East African lake sediment: Effects of temperature, pH, and new lacustrine paleotemperature calibrations								52.303	39.7565	7.94049	0.261808
Katanda	0.483	30.267	28.8527	12.8719	2.18547	8.42661	20.6582	5.16524	10.543	0.53408	1.1411	2.28004	6.43255	0.212421	0.542178	0	0.15454	Distributions of 5- and 30-methyl branched glycerol dialkyl glycerol tetraethers (brGDGTs) in East African lake sediment: Effects of temperature, pH, and new lacustrine paleotemperature calibrations								43.9101	46.4682	9.62173	0.392685
Katunda	0.28	29.895	17.9898	1.04592	0.225511	30.7448	4.2789	1.75626	0.0807788	0.459961	0	35.6784	7.53405	0.205676	0	0	0	Distributions of 5- and 31-methyl branched glycerol dialkyl glycerol tetraethers (brGDGTs) in East African lake sediment: Effects of temperature, pH, and new lacustrine paleotemperature calibrations								19.2612	37.3207	43.4181	0.0777179
Kifuruka	0.483	30.283	31.9046	8.0618	1.05302	12.3041	21.6175	3.67184	6.98917	0	0.282585	4.16183	9.42971	0	0.523827	0	0	Distributions of 5- and 32-methyl branched glycerol dialkyl glycerol tetraethers (brGDGTs) in East African lake sediment: Effects of temperature, pH, and new lacustrine paleotemperature calibrations								41.0195	44.8652	14.1154	0.247878
Kisibendi	0.383	30.3	41.4471	4.87926	0.504761	10.2388	29.7372	1.12843	3.07569	0	0	3.40096	5.58785	0	0	0	0	Distributions of 5- and 33-methyl branched glycerol dialkyl glycerol tetraethers (brGDGTs) in East African lake sediment: Effects of temperature, pH, and new lacustrine paleotemperature calibrations								46.8311	44.1801	8.98881	0.125745
Kitere	0.4	30.25	35.3738	10.8001	0.871733	6.6727	25.285	3.15142	9.1899	0.224529	0.246286	1.81723	5.99689	0	0.370374	0	0	Distributions of 5- and 34-methyl branched glycerol dialkyl glycerol tetraethers (brGDGTs) in East African lake sediment: Effects of temperature, pH, and new lacustrine paleotemperature calibrations								47.0457	44.7698	8.18449	0.266625
Kopello	0.31	29.892	16.1051	0.268525	0.0863121	34.6956	3.59525	0.703679	0.0686613	0.407929	0	41.4858	2.3652	0.0770685	0	0.0761556	0.0647511	Distributions of 5- and 35-methyl branched glycerol dialkyl glycerol tetraethers (brGDGTs) in East African lake sediment: Effects of temperature, pH, and new lacustrine paleotemperature calibrations								16.46	39.4711	44.069	0.0268014
Kyasunduka	-0.283	30.042	38.8328	13.412	1.05696	6.33389	20.3334	4.54356	7.77912	0.285912	0	1.80359	5.26461	0	0.354251	0	0	Distributions of 5- and 36-methyl branched glycerol dialkyl glycerol tetraethers (brGDGTs) in East African lake sediment: Effects of temperature, pH, and new lacustrine paleotemperature calibrations								53.3017	39.2759	7.42245	0.291283
Kyerbwato	0.433	30.317	39.2929	11.6952	2.18097	9.22464	18.9445	5.24987	4.58807	0.81828	0.224058	2.26489	5.01707	0.200923	0.29861	0	0	Distributions of 5- and 37-methyl branched glycerol dialkyl glycerol tetraethers (brGDGTs) in East African lake sediment: Effects of temperature, pH, and new lacustrine paleotemperature calibrations								53.1691	39.0494	7.78149	0.302001
Kyogo	-0.333	30.017	53.2592	9.25075	1.09439	13.7924	13.0346	1.83109	3.68901	0.300899	0.132129	1.8642	1.57195	0.0511633	0.128337	0	0	Distributions of 5- and 38-methyl branched glycerol dialkyl glycerol tetraethers (brGDGTs) in East African lake sediment: Effects of temperature, pH, and new lacustrine paleotemperature calibrations								63.6043	32.78	3.61565	0.179854
Lake Ellis	-0.124	37.401	22.2765	8.36634	2.27764	23.4656	7.38387	12.3007	3.19515	1.63256	0.294236	14.4727	3.42065	0.644755	0.269257	0	0	Distributions of 5- and 39-methyl branched glycerol dialkyl glycerol tetraethers (brGDGTs) in East African lake sediment: Effects of temperature, pH, and new lacustrine paleotemperature calibrations								32.9205	48.2721	18.8073	0.39251
Large Hall Tarn	-0.143	37.346	23.0361	2.49331	0.746269	29.4278	11.387	3.00665	0.202251	0.821433	0	23.3091	5.57004	0	0	0	0	Distributions of 5- and 40-methyl branched glycerol dialkyl glycerol tetraethers (brGDGTs) in East African lake sediment: Effects of temperature, pH, and new lacustrine paleotemperature calibrations								26.2757	44.8452	28.8791	0.151693
Lewis Tarn	-0.162	37.311	15.9508	2.66452	0.337198	29.988	5.3835	3.38603	0.177648	0.480142	0	33.6821	7.46878	0.231146	0.250162	0	0	Distributions of 5- and 41-methyl branched glycerol dialkyl glycerol tetraethers (brGDGTs) in East African lake sediment: Effects of temperature, pH, and new lacustrine paleotemperature calibrations								18.9525	39.4153	41.6322	0.176173
Lower Simba	-0.145	37.319	15.2659	1.90749	0.425921	32.4514	4.14681	10.5442	0.430782	0	0	27.2618	7.56568	0	0	0	0	Distributions of 5- and 42-methyl branched glycerol dialkyl glycerol tetraethers (brGDGTs) in East African lake sediment: Effects of temperature, pH, and new lacustrine paleotemperature calibrations								17.5993	47.5732	34.8275	0.156787
Mahoma	0.346	29.968	33.8363	0.829201	0.365658	37.2038	3.28041	0.827109	0.0785371	0.322866	0	22.3446	0.911524	0	0	0	0	Distributions of 5- and 43-methyl branched glycerol dialkyl glycerol tetraethers (brGDGTs) in East African lake sediment: Effects of temperature, pH, and new lacustrine paleotemperature calibrations								35.0311	41.7127	23.2561	0.0445466
Mahuhura	0.433	30.267	15.3594	9.01741	0.608251	27.4221	11.7104	6.62438	0.196607	0.223334	0	18.6188	9.91096	0.308441	0	0	0	Distributions of 5- and 44-methyl branched glycerol dialkyl glycerol tetraethers (brGDGTs) in East African lake sediment: Effects of temperature, pH, and new lacustrine paleotemperature calibrations								24.9851	46.1768	28.8382	0.409601
Mbajo	0.45	30.267	30.3163	11.7533	2.25872	9.03577	20.8331	4.49789	9.86645	0.457778	0.857687	2.25043	6.9249	0.170942	0.620015	0	0.156753	Distributions of 5- and 45-methyl branched glycerol dialkyl glycerol tetraethers (brGDGTs) in East African lake sediment: Effects of temperature, pH, and new lacustrine paleotemperature calibrations								44.3283	45.5486	10.123	0.367052
Mbugo	-0.167	30.15	36.5591	8.56562	0.87837	17.2661	16.6513	2.90896	5.89197	0	0	5.46759	5.81097	0	0	0	0	Distributions of 5- and 46-methyl branched glycerol dialkyl glycerol tetraethers (brGDGTs) in East African lake sediment: Effects of temperature, pH, and new lacustrine paleotemperature calibrations								46.0031	42.7184	11.2786	0.224384
Middle Kachope	0.333	29.867	12.9301	1.45216	0.280304	24.0797	5.03548	1.78725	0.265807	0.3193	0	43.9735	9.71236	0.164096	0	0	0	Distributions of 5- and 47-methyl branched glycerol dialkyl glycerol tetraethers (brGDGTs) in East African lake sediment: Effects of temperature, pH, and new lacustrine paleotemperature calibrations								14.6625	31.4876	53.8499	0.137273
Mirambi	-0.217	30.1	38.4324	14.7671	1.23971	13.1992	15.1036	5.87896	4.16072	0	0	3.87419	3.34403	0	0	0	0	Distributions of 5- and 48-methyl branched glycerol dialkyl glycerol tetraethers (brGDGTs) in East African lake sediment: Effects of temperature, pH, and new lacustrine paleotemperature calibrations								54.4393	38.3425	7.21823	0.316803
Murabio	-0.35	30.033	44.2127	10.5873	2.24361	7.11758	19.508	2.96292	5.76593	0.424431	0.194721	1.93385	4.64584	0.105249	0.297907	0	0	Distributions of 5- and 49-methyl branched glycerol dialkyl glycerol tetraethers (brGDGTs) in East African lake sediment: Effects of temperature, pH, and new lacustrine paleotemperature calibrations								57.0436	35.9735	6.98284	0.264263
Murusi	0.433	30.283	40.5697	12.0556	1.7377	13.162	16.1999	5.09121	3.96397	0.443884	0.226853	2.91008	3.31379	0.143439	0.181803	0	0	Distributions of 5- and 50-methyl branched glycerol dialkyl glycerol tetraethers (brGDGTs) in East African lake sediment: Effects of temperature, pH, and new lacustrine paleotemperature calibrations								54.363	39.0879	6.54912	0.28569
Mwengenyi	0.483	30.267	30.2456	11.1293	2.80944	13.2061	19.1703	5.74627	5.34505	0.896318	0.42765	3.89074	6.42138	0.306134	0.336154	0	0.06955	Distributions of 5- and 51-methyl branched glycerol dialkyl glycerol tetraethers (brGDGTs) in East African lake sediment: Effects of temperature, pH, and new lacustrine paleotemperature calibrations								44.1844	44.7917	11.024	0.379053
Nanyuki Tarn	-0.155	37.297	13.6243	5.25861	2.83265	27.704	4.10361	12.3738	0.851963	2.6372	0	23.917	5.64477	1.05216	0	0	0	Distributions of 5- and 52-methyl branched glycerol dialkyl glycerol tetraethers (brGDGTs) in East African lake sediment: Effects of temperature, pH, and new lacustrine paleotemperature calibrations								21.7155	47.6706	30.6139	0.503047
Njarayabana	0.433	30.25	30.352	10.0275	1.0289	11.4096	25.677	3.92296	6.07349	0.158809	0.291917	3.67845	6.8516	0.181795	0.346094	0	0	Distributions of 5- and 53-methyl branched glycerol dialkyl glycerol tetraethers (brGDGTs) in East African lake sediment: Effects of temperature, pH, and new lacustrine paleotemperature calibrations								41.4083	47.5337	11.0579	0.291856
Nkugute	-0.317	30.1	41.53	8.61629	0.990194	14.5724	18.2735	2.4517	4.31527	0	0	4.24422	5.00644	0	0	0	0	Distributions of 5- and 54-methyl branched glycerol dialkyl glycerol tetraethers (brGDGTs) in East African lake sediment: Effects of temperature, pH, and new lacustrine paleotemperature calibrations								51.1365	39.6128	9.25066	0.207223
Nkuruba	0.517	30.3	34.5702	8.74887	1.58814	10.6739	22.7794	3.75068	5.6802	0.278405	0.449613	2.8257	7.94424	0.197059	0.412546	0	0.100963	Distributions of 5- and 55-methyl branched glycerol dialkyl glycerol tetraethers (brGDGTs) in East African lake sediment: Effects of temperature, pH, and new lacustrine paleotemperature calibrations								44.9072	43.6123	11.4805	0.265551
Nyamswiga	0.517	30.283	33.0207	9.78723	1.78769	13.098	21.1392	4.32349	5.07217	0	0	3.9403	7.83133	0	0	0	0	Distributions of 5- and 56-methyl branched glycerol dialkyl glycerol tetraethers (brGDGTs) in East African lake sediment: Effects of temperature, pH, and new lacustrine paleotemperature calibrations								44.5956	43.6328	11.7716	0.29964
Nyamugosani	0.417	30.233	30.496	11.3608	1.72193	11.2043	21.7929	4.59504	7.24753	0.263113	0.384857	3.39507	6.7791	0.318336	0.440969	0	0	Distributions of 5- and 57-methyl branched glycerol dialkyl glycerol tetraethers (brGDGTs) in East African lake sediment: Effects of temperature, pH, and new lacustrine paleotemperature calibrations								43.5788	45.4878	10.9335	0.339722
Nyamusingere	-0.283	30.033	34.653	13.5792	1.24431	5.47926	22.5792	2.71629	10.9933	0.430786	0.363966	1.46303	5.9458	0	0.551806	0	0	Distributions of 5- and 58-methyl branched glycerol dialkyl glycerol tetraethers (brGDGTs) in East African lake sediment: Effects of temperature, pH, and new lacustrine paleotemperature calibrations								49.4766	42.5628	7.96063	0.324756
Nyantonde	0.483	30.283	32.6598	9.48943	1.2238	10.2197	24.183	4.27285	7.05514	0.295212	0.477322	2.54733	6.90376	0.199352	0.37614	0	0.0971965	Distributions of 5- and 59-methyl branched glycerol dialkyl glycerol tetraethers (brGDGTs) in East African lake sediment: Effects of temperature, pH, and new lacustrine paleotemperature calibrations								43.373	46.5032	10.1238	0.275218
Oblong Tarn	-0.144	37.301	14.6149	2.08399	0.870248	33.6501	2.9946	6.33774	0.413428	0	0	33.909	5.12598	0	0	0	0	Distributions of 5- and 60-methyl branched glycerol dialkyl glycerol tetraethers (brGDGTs) in East African lake sediment: Effects of temperature, pH, and new lacustrine paleotemperature calibrations								17.5691	43.3959	39.035	0.217682
Ruhandika	0.383	29.883	11.9395	0.38512	0.0375533	21.4134	8.63325	0.379189	0.350107	0	0	48.0636	8.79829	0	0	0	0	Distributions of 5- and 61-methyl branched glycerol dialkyl glycerol tetraethers (brGDGTs) in East African lake sediment: Effects of temperature, pH, and new lacustrine paleotemperature calibrations								12.3622	30.7759	56.8619	0.0372285
Rutundu	-0.042	37.464	25.8276	9.28893	3.88617	25.2644	5.77991	10.9263	0.857461	2.68142	0	13.7858	1.70208	0	0	0	0	Distributions of 5- and 62-methyl branched glycerol dialkyl glycerol tetraethers (brGDGTs) in East African lake sediment: Effects of temperature, pH, and new lacustrine paleotemperature calibrations								39.0027	45.5095	15.4878	0.437439
Small Hall Tarn	-0.144	37.345	19.317	1.55341	0.426152	26.1621	11.7606	2.09474	0.598997	0.44534	0	30.5967	6.74322	0.136322	0.165374	0	0	Distributions of 5- and 63-methyl branched glycerol dialkyl glycerol tetraethers (brGDGTs) in East African lake sediment: Effects of temperature, pH, and new lacustrine paleotemperature calibrations								21.2966	41.0618	37.6416	0.112963
Square Tarn	-0.154	37.323	16.9359	0.328747	0.106972	28.4166	15.0019	0.398412	0.300731	0	0	22.8355	15.6752	0	0	0	0	Distributions of 5- and 64-methyl branched glycerol dialkyl glycerol tetraethers (brGDGTs) in East African lake sediment: Effects of temperature, pH, and new lacustrine paleotemperature calibrations								17.3716	44.1177	38.5107	0.0312402
Tanganyika	-4.872	29.617	31.8785	8.64137	3.50629	4.85311	27.5331	2.9503	5.31547	0.769792	1.18314	2.01879	10.7654	0.201342	0.247174	0	0.136169	Distributions of 5- and 65-methyl branched glycerol dialkyl glycerol tetraethers (brGDGTs) in East African lake sediment: Effects of temperature, pH, and new lacustrine paleotemperature calibrations								44.0262	42.6049	13.3689	0.35556
Teleki Tarn	-0.169	37.306	16.9544	6.13879	1.63917	22.3786	4.96312	20.8529	0.649276	2.23463	0	17.191	6.99812	0	0	0	0	Distributions of 5- and 66-methyl branched glycerol dialkyl glycerol tetraethers (brGDGTs) in East African lake sediment: Effects of temperature, pH, and new lacustrine paleotemperature calibrations								24.7324	51.0785	24.1891	0.380761
Thompson Lake	-0.168	37.32	13.1621	2.02016	0.649072	23.1319	6.8716	5.45408	0.433873	0	0	37.7398	10.5374	0	0	0	0	Distributions of 5- and 67-methyl branched glycerol dialkyl glycerol tetraethers (brGDGTs) in East African lake sediment: Effects of temperature, pH, and new lacustrine paleotemperature calibrations								15.8313	35.8915	48.2772	0.209604
Veggi Tarn	-0.144	37.344	11.5863	1.36124	0.344294	22.9111	9.95121	2.11999	0.292523	0.250357	0	44.2788	6.72227	0.181961	0	0	0	Distributions of 5- and 68-methyl branched glycerol dialkyl glycerol tetraethers (brGDGTs) in East African lake sediment: Effects of temperature, pH, and new lacustrine paleotemperature calibrations								13.2918	35.5252	51.183	0.154217
Wandakara	0.417	30.267	35.9208	8.82986	0.908315	7.53108	25.2013	2.91817	8.04141	0	0.405206	2.09833	7.66043	0	0.485096	0	0	Distributions of 5- and 69-methyl branched glycerol dialkyl glycerol tetraethers (brGDGTs) in East African lake sediment: Effects of temperature, pH, and new lacustrine paleotemperature calibrations								45.659	44.0972	10.2438	0.233174
Wankenzi	0.425	30.267	36.1182	8.93645	0.910924	7.34909	25.2436	2.86412	8.13269	0.171258	0.360369	2.0187	7.17524	0.181222	0.468747	0	0.0693953	Distributions of 5- and 70-methyl branched glycerol dialkyl glycerol tetraethers (brGDGTs) in East African lake sediment: Effects of temperature, pH, and new lacustrine paleotemperature calibrations								45.9656	44.1211	9.9133	0.234051
HH-1	29.8833	113.417	21	13	2	14	16	11	6	1	0	5	8	1	1	0	0	Environmental impacts on the distribution of microbial tetraether lipids in Chinese lakes with contrasting pH: Implications for lacustrine paleoenvironmental reconstructions								36	48	15	0.472222
LZH-1	30.2167	114.617	22	16	3	18	12	11	5	1	0	6	4	1	1	0	0	Environmental impacts on the distribution of microbial tetraether lipids in Chinese lakes with contrasting pH: Implications for lacustrine paleoenvironmental reconstructions								41	47	12	0.536585
LGH-1	29.9	116.1	26	16	3	17	11	9	6	1	1	4	4	1	1	0	0	Environmental impacts on the distribution of microbial tetraether lipids in Chinese lakes with contrasting pH: Implications for lacustrine paleoenvironmental reconstructions								45	45	10	0.488889
WCH-1	30.2667	116.683	25	18	3	18	10	11	5	1	0	4	3	1	0	0	0	Environmental impacts on the distribution of microbial tetraether lipids in Chinese lakes with contrasting pH: Implications for lacustrine paleoenvironmental reconstructions								46	45	8	0.521739
CZH-2			26	15	2	19	13	9	4	1	0	5	4	1	0	0	0	Environmental impacts on the distribution of microbial tetraether lipids in Chinese lakes with contrasting pH: Implications for lacustrine paleoenvironmental reconstructions								43	46	10	0.44186
CH-1	31.5833	117.733	22	16	3	19	10	11	6	1	1	5	4	1	1	0	0	Environmental impacts on the distribution of microbial tetraether lipids in Chinese lakes with contrasting pH: Implications for lacustrine paleoenvironmental reconstructions								41	48	11	0.536585
SJH-1	31.4833	118.933	21	15	3	17	14	11	5	1	0	5	7	1	1	0	0	Environmental impacts on the distribution of microbial tetraether lipids in Chinese lakes with contrasting pH: Implications for lacustrine paleoenvironmental reconstructions								39	48	14	0.538462
CDH-1	31.6167	119.567	21	15	3	19	12	12	4	1	0	5	5	1	1	0	0	Environmental impacts on the distribution of microbial tetraether lipids in Chinese lakes with contrasting pH: Implications for lacustrine paleoenvironmental reconstructions								39	48	12	0.538462
YCH-1	31.4333	120.783	21	14	2	19	12	12	5	1	0	6	6	1	1	0	0	Environmental impacts on the distribution of microbial tetraether lipids in Chinese lakes with contrasting pH: Implications for lacustrine paleoenvironmental reconstructions								37	49	14	0.486486
GYH-3	32.8	119.333	19	15	3	15	12	10	10	1	1	5	6	1	1	0	0	Environmental impacts on the distribution of microbial tetraether lipids in Chinese lakes with contrasting pH: Implications for lacustrine paleoenvironmental reconstructions								37	49	13	0.567568
HZH-2	33.3	118.75	17	16	4	13	11	10	12	1	2	5	6	1	2	0	0	Environmental impacts on the distribution of microbial tetraether lipids in Chinese lakes with contrasting pH: Implications for lacustrine paleoenvironmental reconstructions								37	49	14	0.648649
LMH-2	34.0667	118.15	20	10	1	13	23	8	8	1	0	5	10	1	1	0	0	Environmental impacts on the distribution of microbial tetraether lipids in Chinese lakes with contrasting pH: Implications for lacustrine paleoenvironmental reconstructions								31	53	17	0.387097
WSH-2	34.6333	117.267	20	12	2	18	15	11	5	1	0	6	7	1	1	0	0	Environmental impacts on the distribution of microbial tetraether lipids in Chinese lakes with contrasting pH: Implications for lacustrine paleoenvironmental reconstructions								34	50	15	0.470588
DSH-3	35.0667	116.733	20	11	2	15	19	9	6	1	0	6	9	1	1	0	0	Environmental impacts on the distribution of microbial tetraether lipids in Chinese lakes with contrasting pH: Implications for lacustrine paleoenvironmental reconstructions								33	50	17	0.454545
DPH-2	35.95	116.183	18	13	2	17	16	12	5	1	0	6	7	1	1	0	0	Environmental impacts on the distribution of microbial tetraether lipids in Chinese lakes with contrasting pH: Implications for lacustrine paleoenvironmental reconstructions								33	51	15	0.515152
HSH-2	37.6333	115.617	20	10	1	15	19	7	7	0	0	7	10	1	2	0	0	Environmental impacts on the distribution of microbial tetraether lipids in Chinese lakes with contrasting pH: Implications for lacustrine paleoenvironmental reconstructions								31	48	20	0.387097
BYD-3	38.9167	115.983	22	12	2	16	18	8	6	1	0	5	8	1	1	0	0	Environmental impacts on the distribution of microbial tetraether lipids in Chinese lakes with contrasting pH: Implications for lacustrine paleoenvironmental reconstructions								36	49	15	0.444444
tc-1	25.1167	98.5667	50	5	1	25	8	2	1	0	0	5	2	0	0	0	0	Environmental impacts on the distribution of microbial tetraether lipids in Chinese lakes with contrasting pH: Implications for lacustrine paleoenvironmental reconstructions								56	36	7	0.125
tc-2	25.1167	98.5667	48	6	2	25	9	2	1	1	0	5	2	0	0	0	0	Environmental impacts on the distribution of microbial tetraether lipids in Chinese lakes with contrasting pH: Implications for lacustrine paleoenvironmental reconstructions								56	38	7	0.178571
tc-3	25.1167	98.5667	51	6	2	23	9	2	1	1	0	5	2	0	0	0	0	Environmental impacts on the distribution of microbial tetraether lipids in Chinese lakes with contrasting pH: Implications for lacustrine paleoenvironmental reconstructions								59	36	7	0.169492
tc-4	25.1167	98.5667	48	6	2	25	8	2	1	1	0	5	2	0	0	0	0	Environmental impacts on the distribution of microbial tetraether lipids in Chinese lakes with contrasting pH: Implications for lacustrine paleoenvironmental reconstructions								56	37	7	0.178571
tc-5	25.1167	98.5667	50	6	2	24	8	2	1	1	0	5	2	0	0	0	0	Environmental impacts on the distribution of microbial tetraether lipids in Chinese lakes with contrasting pH: Implications for lacustrine paleoenvironmental reconstructions								58	36	7	0.172414
tc-6	25.1167	98.5667	49	6	2	25	8	2	1	1	0	5	2	0	0	0	0	Environmental impacts on the distribution of microbial tetraether lipids in Chinese lakes with contrasting pH: Implications for lacustrine paleoenvironmental reconstructions								57	37	7	0.175439
tc-7	25.1167	98.5667	49	6	2	25	8	2	1	1	0	5	2	0	0	0	0	Environmental impacts on the distribution of microbial tetraether lipids in Chinese lakes with contrasting pH: Implications for lacustrine paleoenvironmental reconstructions								57	37	7	0.175439
tc-8	25.1167	98.5667	46	7	2	25	9	3	1	1	0	5	2	0	0	0	0	Environmental impacts on the distribution of microbial tetraether lipids in Chinese lakes with contrasting pH: Implications for lacustrine paleoenvironmental reconstructions								55	39	7	0.2
DH-6 CL	30.8667	114.6	20.84	14.72	2.52	17.24	12.16	11.7	5.63	1.52	0.32	6.19	5.25	0.96	0.71	0.15	0.06	Rapid response of fossil tetraether lipids in lake sediments to seasonal environmental variables in a shallow lake in central China: Implications for the use of tetraether-based proxies								38.08	48.57	13.32	0.518908
DH-7 CL	30.8667	114.6	21.39	15.04	2.55	17.65	11.52	11.97	5.2	1.48	0.35	6	5.01	0.92	0.65	0.16	0.07	Rapid response of fossil tetraether lipids in lake sediments to seasonal environmental variables in a shallow lake in central China: Implications for the use of tetraether-based proxies								38.98	48.17	12.81	0.516675
DH-9 CL	30.8667	114.6	21.48	15.03	2.48	17.12	12.17	11.59	5.73	1.42	0.33	5.71	5.07	0.91	0.71	0.16	0.06	Rapid response of fossil tetraether lipids in lake sediments to seasonal environmental variables in a shallow lake in central China: Implications for the use of tetraether-based proxies								38.99	48.36	12.62	0.512696
DH-10 CL	30.8667	114.6	21.92	15.84	2.46	17.38	12.12	11.14	6.11	1.33	0.3	5.34	4.37	0.74	0.63	0.12	0.05	Rapid response of fossil tetraether lipids in lake sediments to seasonal environmental variables in a shallow lake in central China: Implications for the use of tetraether-based proxies								40.22	48.38	11.25	0.516161
DH-11 CL	30.8667	114.6	21.5808	15.0609	2.53974	16.4017	12.9444	11.0494	6.24414	1.4341	0.331904	5.46306	5.11516	0.897848	0.670924	0.154112	0.0615222	Rapid response of fossil tetraether lipids in lake sediments to seasonal environmental variables in a shallow lake in central China: Implications for the use of tetraether-based proxies								39.1815	48.4056	12.3626	0.514029
DH-12 CL	30.8667	114.6	20.78	14.43	2.44	16.59	13.01	11.33	6.26	1.48	0.36	5.97	5.35	0.92	0.82	0.18	0.08	Rapid response of fossil tetraether lipids in lake sediments to seasonal environmental variables in a shallow lake in central China: Implications for the use of tetraether-based proxies								37.65	49.03	13.32	0.512882
DH-1 CL	30.8667	114.6	20.34	14.29	2.43	16.97	12.69	11.76	5.86	1.45	0.34	6.3	5.58	1	0.76	0.17	0.07	Rapid response of fossil tetraether lipids in lake sediments to seasonal environmental variables in a shallow lake in central China: Implications for the use of tetraether-based proxies								37.06	49.07	13.88	0.51673
DH-2 CL	30.8667	114.6	20.56	14.67	2.59	16.61	13.11	11.54	5.99	1.52	0.38	5.73	5.34	0.95	0.76	0.17	0.07	Rapid response of fossil tetraether lipids in lake sediments to seasonal environmental variables in a shallow lake in central China: Implications for the use of tetraether-based proxies								37.82	49.15	13.02	0.524855
DH-3 CL	30.8667	114.6	20.53	14.49	2.5	17.26	12.53	11.67	5.97	1.51	0.35	5.93	5.3	0.97	0.7	0.17	0.07	Rapid response of fossil tetraether lipids in lake sediments to seasonal environmental variables in a shallow lake in central China: Implications for the use of tetraether-based proxies								37.52	49.29	13.14	0.519456
DH-4 CL	30.8667	114.6	20.15	14.8	2.52	16.99	12.52	11.6	5.91	1.47	0.35	6.31	5.43	0.99	0.73	0.17	0.07	Rapid response of fossil tetraether lipids in lake sediments to seasonal environmental variables in a shallow lake in central China: Implications for the use of tetraether-based proxies								37.47	48.84	13.7	0.52949
DH-5 CL	30.8667	114.6	21.1106	15.4616	2.73474	16.8431	13.0574	11.449	6.12286	1.44985	0.327096	5.4141	4.41066	0.787539	0.831448	0.131186	0.0548189	Rapid response of fossil tetraether lipids in lake sediments to seasonal environmental variables in a shallow lake in central China: Implications for the use of tetraether-based proxies								39.3069	49.2494	11.6298	0.532503
2DH-6 CL	30.8667	114.6	20.7461	15.2116	2.69082	16.628	12.2048	11.4973	6.02765	1.53718	0.349318	6.04223	4.9932	0.969234	0.851141	0.165961	0.085364	Rapid response of fossil tetraether lipids in lake sediments to seasonal environmental variables in a shallow lake in central China: Implications for the use of tetraether-based proxies								38.6486	48.2443	13.1071	0.532834
2DH-7 CL	30.8667	114.6	22.1066	15.3944	2.75556	15.7286	12.473	11.2436	5.98868	1.57216	0.336189	5.33582	5.12376	0.895233	0.789507	0.163956	0.0930182	Rapid response of fossil tetraether lipids in lake sediments to seasonal environmental variables in a shallow lake in central China: Implications for the use of tetraether-based proxies								40.2565	47.3422	12.4013	0.519307
2DH-8 CL	30.8667	114.6	21.9088	15.4894	2.7156	16.1203	11.9545	11.4525	5.79586	1.50736	0.380459	5.64353	5.01983	0.960317	0.82351	0.171123	0.0902043	Rapid response of fossil tetraether lipids in lake sediments to seasonal environmental variables in a shallow lake in central China: Implications for the use of tetraether-based proxies								40.1137	47.211	12.7085	0.521532
2DH-12 CL	30.8667	114.6	20.5562	14.9436	2.56459	17.0637	12.1963	11.4973	5.81347	1.4492	0.353963	6.20015	5.25627	1.01157	0.831735	0.175862	0.0860985	Rapid response of fossil tetraether lipids in lake sediments to seasonal environmental variables in a shallow lake in central China: Implications for the use of tetraether-based proxies								38.0644	48.3739	13.5617	0.527337
2DH-1 CL	30.8667	114.6	20.5791	14.8274	2.57184	17.0051	12.2408	11.5346	5.91778	1.47456	0.35448	6.15839	5.28512	0.964387	0.842023	0.158842	0.0856322	Rapid response of fossil tetraether lipids in lake sediments to seasonal environmental variables in a shallow lake in central China: Implications for the use of tetraether-based proxies								37.9783	48.5273	13.4944	0.525855
2DH-2 CL	30.8667	114.6	20.7961	14.6226	2.54262	16.7827	12.5555	11.2061	6.00679	1.47347	0.346598	6.18882	5.34713	0.981113	0.895716	0.170874	0.0837412	Rapid response of fossil tetraether lipids in lake sediments to seasonal environmental variables in a shallow lake in central China: Implications for the use of tetraether-based proxies								37.9614	48.3713	13.6674	0.519156
DH-S-6 CL	30.8667	114.6	25.8222	13.4354	2.20559	16.8373	13.7456	9.487	5.38106	1.29972	0.393856	5.02166	5.18905	0.728633	0.452934	0	0	Rapid response of fossil tetraether lipids in lake sediments to seasonal environmental variables in a shallow lake in central China: Implications for the use of tetraether-based proxies								41.4632	47.1445	11.3923	0.43042
DH-S-7 CL	30.8667	114.6	23.6658	12.5794	2.38247	14.7078	15.4807	9.75222	7.18975	1.33418	0.825921	5.51673	4.56374	0.92122	0.412961	0.360017	0.307073	Rapid response of fossil tetraether lipids in lake sediments to seasonal environmental variables in a shallow lake in central China: Implications for the use of tetraether-based proxies								38.6277	49.2906	12.0817	0.449013
DH-S-9 CL	30.8667	114.6	21.8748	17.0741	0.876792	16.4369	14.492	19.1006	1.52034	0.911285	0.459664	1.47093	4.64606	0.124224	0.737761	0.278097	0	Rapid response of fossil tetraether lipids in lake sediments to seasonal environmental variables in a shallow lake in central China: Implications for the use of tetraether-based proxies								39.8257	52.9207	7.25707	0.472752
DH-S-10 CL	30.8667	114.6	20.6554	10.3415	1.23428	6.44768	31.0744	4.21036	11.5998	0.594015	0.282292	2.05833	10.0592	0.360974	0.840271	0.110514	0.130936	Rapid response of fossil tetraether lipids in lake sediments to seasonal environmental variables in a shallow lake in central China: Implications for the use of tetraether-based proxies								32.2312	54.2086	13.5602	0.397443
DH-S-11 CL	30.8667	114.6	21.9992	13.0738	2.16524	12.9201	18.8539	7.99198	7.88766	1.0936	0.37521	3.93513	8.05147	0.729373	0.798924	0.12446	0	Rapid response of fossil tetraether lipids in lake sediments to seasonal environmental variables in a shallow lake in central China: Implications for the use of tetraether-based proxies								37.2383	49.1224	13.6394	0.467376
DH-S-12 CL	30.8667	114.6	23.3357	14.166	2.67745	14.4724	15.7409	8.96778	7.38127	1.24298	0.353976	4.44965	5.76343	0.658047	0.66385	0.126503	0	Rapid response of fossil tetraether lipids in lake sediments to seasonal environmental variables in a shallow lake in central China: Implications for the use of tetraether-based proxies								40.1792	48.1593	11.6615	0.485846
DH-S-1 CL	30.8667	114.6	21.4477	14.1986	2.45485	16.6971	13.1541	10.5758	7.05429	1.50824	0.315348	5.46283	5.32412	0.839608	0.709393	0.170413	0.0877541	Rapid response of fossil tetraether lipids in lake sediments to seasonal environmental variables in a shallow lake in central China: Implications for the use of tetraether-based proxies								38.1011	49.3048	12.5941	0.501516
DH-S-2 CL	30.8667	114.6	23.7571	14.7661	2.57126	14.831	13.893	10.2369	6.76368	1.23632	0.500301	4.7745	4.81539	0.815394	0.78172	0.257366	0	Rapid response of fossil tetraether lipids in lake sediments to seasonal environmental variables in a shallow lake in central China: Implications for the use of tetraether-based proxies								41.0944	47.4612	11.4444	0.48446
DH-S-3 CL	30.8667	114.6	22.9957	14.8822	2.57038	14.5961	14.87	9.74908	6.75643	1.42748	0.359547	4.8317	5.07344	0.820073	0.729804	0.234088	0.104039	Rapid response of fossil tetraether lipids in lake sediments to seasonal environmental variables in a shallow lake in central China: Implications for the use of tetraether-based proxies								40.4483	47.7586	11.7931	0.495026
DH-S-4 CL	30.8667	114.6	20.9008	12.6159	2.7983	14.3845	16.554	8.615	7.09008	2.13017	0.723157	4.7634	6.97217	0.951108	1.50134	0	0	Rapid response of fossil tetraether lipids in lake sediments to seasonal environmental variables in a shallow lake in central China: Implications for the use of tetraether-based proxies								36.315	49.4969	14.188	0.501515
DH-S-5 CL	30.8667	114.6	23.7516	14.5807	2.54193	15.024	14.0876	6.73037	1.54463	0.412184	0.607697	5.5573	14.4358	0.820137	2.65423	0.269147	0	Rapid response of fossil tetraether lipids in lake sediments to seasonal environmental variables in a shallow lake in central China: Implications for the use of tetraether-based proxies								40.8742	38.4065	23.7366	0.481099
SPM10	46.0108	9.02027	12.697	4.17081	0.88839	9.60115	15.1191	2.86491	6.27637	0.359303	0.570167	8.56299	36.7857	0.468542	1.30471	0.0703426	0.260433	Redox-dependent niche differentiation provides evidence for multiple bacterial sources of glycerol tetraether lipids in lakes								17.7562	34.791	47.4528	0.334958
SPM30	46.0108	9.02027	5.18733	1.81883	0.426641	4.12134	7.89749	1.59702	2.92636	0.15215	0.367111	5.66346	68.0611	0.812371	0.735091	0.0517155	0.181944	Redox-dependent niche differentiation provides evidence for multiple bacterial sources of glycerol tetraether lipids in lakes								7.43281	17.0615	75.5057	0.359503
SPM40	46.0108	9.02027	2.29682	0.765675	0.183389	1.65435	4.73405	0.619778	1.19165	0.0660768	0.1637	2.96771	84.4466	0.524588	0.30403	0.020464	0.0610852	Redox-dependent niche differentiation provides evidence for multiple bacterial sources of glycerol tetraether lipids in lakes								3.24589	8.42961	88.3245	0.348889
SPM50	46.0108	9.02027	1.17461	0.32973	0.0701943	0.907492	3.43085	0.37817	0.533105	0.0298354	0.102083	3.90386	88.5286	0.431187	0.139976	0.00936812	0.0309271	Redox-dependent niche differentiation provides evidence for multiple bacterial sources of glycerol tetraether lipids in lakes								1.57453	5.38153	93.0439	0.298577
SPM60	46.0108	9.02027	0.840278	0.194536	0.0416002	0.574934	2.65422	0.294302	0.271767	0.0161614	0.0625547	4.12991	90.4174	0.404939	0.0718803	0.00546986	0.0200135	Redox-dependent niche differentiation provides evidence for multiple bacterial sources of glycerol tetraether lipids in lakes								1.07641	3.87394	95.0496	0.25802
SPM70	46.0108	9.02027	0.68135	0.170206	0.0358268	0.543284	2.47223	0.321359	0.245081	0.0148907	0.05927	5.10317	89.8518	0.415706	0.0655586	0.00553582	0.0146952	Redox-dependent niche differentiation provides evidence for multiple bacterial sources of glycerol tetraether lipids in lakes								0.887382	3.65611	95.4565	0.272554
SPM80	46.0108	9.02027	0.796046	0.212948	0.0446093	0.635305	2.32939	0.425174	0.281056	0.0173392	0.0863774	6.48729	88.1366	0.445965	0.0736361	0.00703704	0.021246	Redox-dependent niche differentiation provides evidence for multiple bacterial sources of glycerol tetraether lipids in lakes								1.0536	3.77464	95.1718	0.286794
SPM90	46.0108	9.02027	0.74134	0.202848	0.0350871	0.661905	2.32813	0.537852	0.229141	0.013285	0.0503243	7.45366	87.1282	0.536895	0.0619172	0.00597975	0.0134665	Redox-dependent niche differentiation provides evidence for multiple bacterial sources of glycerol tetraether lipids in lakes								0.979275	3.82064	95.2001	0.2788
SPM110	46.0108	9.02027	0.791627	0.293142	0.0409165	1.62006	2.28822	1.12053	0.329349	0.0252969	0.0470298	18.0306	74.3475	0.92916	0.103277	0.019154	0.0141415	Redox-dependent niche differentiation provides evidence for multiple bacterial sources of glycerol tetraether lipids in lakes								1.12569	5.43049	93.4438	0.333108
SPM120	46.0108	9.02027	1.24275	0.476119	0.0821902	2.47258	2.72275	1.52075	0.573801	0.0497232	0.0498093	23.5906	65.9022	1.06803	0.191992	0.0279701	0.0287188	Redox-dependent niche differentiation provides evidence for multiple bacterial sources of glycerol tetraether lipids in lakes								1.80106	7.38942	90.8095	0.355623
SPM140	46.0108	9.02027	0.875162	0.359359	0.0513938	3.23569	2.38558	1.89247	0.385976	0.0417482	0.0480121	28.7169	60.4653	1.3653	0.131749	0.0268773	0.01848	Redox-dependent niche differentiation provides evidence for multiple bacterial sources of glycerol tetraether lipids in lakes								1.28592	7.98947	90.7246	0.359391
SPM185	46.0108	9.02027	1.33835	0.667174	0.0889368	4.69112	3.0383	3.17866	0.753024	0.0677304	0.0760136	39.6783	44.2231	1.88277	0.234644	0.0482837	0.0335851	Redox-dependent niche differentiation provides evidence for multiple bacterial sources of glycerol tetraether lipids in lakes								2.09446	11.8048	86.1007	0.403467
SPM230	46.0108	9.02027	1.80894	1.03949	0.138575	5.46157	4.2099	3.91401	1.43352	0.0873738	0.119605	41.6931	37.5871	1.9746	0.427779	0.0520027	0.0524211	Redox-dependent niche differentiation provides evidence for multiple bacterial sources of glycerol tetraether lipids in lakes								2.98701	15.226	81.787	0.440791
SPM275	46.0108	9.02027	2.66562	1.56177	0.229335	5.20763	6.14924	4.10413	2.56043	0.131481	0.160394	36.0605	38.5813	1.69562	0.741378	0.0567461	0.0944088	Redox-dependent niche differentiation provides evidence for multiple bacterial sources of glycerol tetraether lipids in lakes								4.45673	18.3133	77.23	0.453347
AZ			13.4933	1.31673	0.298456	26.1585	10.802	1.52877	3.43187	0.287383	0.0305522	29.9807	10.7683	0.383538	1.36862	0.0727418	0.0785512	Redox-dependent niche differentiation provides evidence for multiple bacterial sources of glycerol tetraether lipids in lakes								15.1084	42.2391	42.6525	0.126661
BA			10.6712	6.00193	1.14147	14.9169	12.4378	9.92544	4.76192	0.478267	0.432311	26.2978	10.5503	1.25383	0.840752	0.115605	0.174512	Redox-dependent niche differentiation provides evidence for multiple bacterial sources of glycerol tetraether lipids in lakes								17.8146	42.9526	39.2328	0.465061
CD			9.8784	3.86917	0.964209	9.36035	14.7942	6.00155	5.95954	0.568201	0.463688	15.3657	29.3745	1.12982	1.75064	0.213779	0.30624	Redox-dependent niche differentiation provides evidence for multiple bacterial sources of glycerol tetraether lipids in lakes								14.7118	37.1475	48.1407	0.394078
CM			25.3767	2.98153	0.522432	32.3148	5.36645	2.29174	0.619637	0.433222	0.0314362	25.66	3.93999	0.232822	0.103323	0.0864162	0.0395717	Redox-dependent niche differentiation provides evidence for multiple bacterial sources of glycerol tetraether lipids in lakes								28.8807	41.0572	30.0621	0.139415
CN			14.3399	7.31647	1.06573	15.399	17.5277	9.91914	6.74893	0.575585	0.326042	11.9649	11.63	1.59713	1.41803	0.0688557	0.102716	Redox-dependent niche differentiation provides evidence for multiple bacterial sources of glycerol tetraether lipids in lakes								22.7221	50.4964	26.7816	0.415804
DS			21.9564	5.20114	1.39852	25.1851	8.24297	6.40614	2.43355	0.597662	0.126706	18.7803	8.11804	0.874292	0.545142	0.0821746	0.0517869	Redox-dependent niche differentiation provides evidence for multiple bacterial sources of glycerol tetraether lipids in lakes								28.5561	42.9922	28.4518	0.280087
ED			16.6348	9.2797	2.46077	15.9015	15.6547	11.0627	5.19823	1.39421	0.229478	9.54855	10.2866	1.06424	0.963692	0.223413	0.0973764	Redox-dependent niche differentiation provides evidence for multiple bacterial sources of glycerol tetraether lipids in lakes								28.3753	49.4408	22.1839	0.500479
EN			10.3638	3.57338	0.784955	10.0631	10.9105	4.54607	5.34427	0.490361	0.567433	25.5338	22.7561	1.70383	2.01595	0.409797	0.936568	Redox-dependent niche differentiation provides evidence for multiple bacterial sources of glycerol tetraether lipids in lakes								14.7222	31.9218	53.3561	0.349357
FA			7.03459	1.81304	0.297565	17.6713	7.96454	4.53855	3.28255	0.238221	0.141148	38.8549	15.3699	1.55604	0.991318	0.112024	0.134293	Redox-dependent niche differentiation provides evidence for multiple bacterial sources of glycerol tetraether lipids in lakes								9.1452	33.8363	57.0185	0.263326
GA			11.3228	5.47083	1.08456	16.2348	18.2637	8.64823	7.43057	0.696458	0.601838	13.7782	13.4614	1.24314	1.4868	0.112815	0.163848	Redox-dependent niche differentiation provides evidence for multiple bacterial sources of glycerol tetraether lipids in lakes								17.8782	51.8756	30.2462	0.427335
GE			15.2689	5.38872	1.55388	19.2559	19.4236	7.64319	3.76493	0.718169	0.173143	12.7373	12.1606	0.97561	0.759742	0.110162	0.0661911	Redox-dependent niche differentiation provides evidence for multiple bacterial sources of glycerol tetraether lipids in lakes								22.2115	50.9789	26.8096	0.382527
GF			11.7923	5.02884	1.21983	12.9031	16.3159	6.59914	6.67704	0.498802	0.379962	16.5532	19.2994	0.810184	1.67606	0.104955	0.14138	Redox-dependent niche differentiation provides evidence for multiple bacterial sources of glycerol tetraether lipids in lakes								18.0409	43.3739	38.5852	0.413976
GH			18.8688	5.46737	1.34421	21.2802	13.0935	5.60644	4.9977	0.71597	0.262761	16.611	9.86016	0.678191	0.99629	0.110798	0.106769	Redox-dependent niche differentiation provides evidence for multiple bacterial sources of glycerol tetraether lipids in lakes								25.6803	45.9565	28.3632	0.317589
GL			8.11118	8.11118	1.2205	9.43765	11.5541	7.12835	7.10415	0.360058	0.506847	28.8954	15.172	0.971131	0.827119	0.214761	0.385573	Redox-dependent niche differentiation provides evidence for multiple bacterial sources of glycerol tetraether lipids in lakes								17.4429	36.0912	46.466	0.604957
GS			36.0588	1.97298	0.791238	32.4505	5.13488	1.29962	0.339868	0.491382	0	16.4687	3.53269	0.432704	0.704018	0.322626	0	Redox-dependent niche differentiation provides evidence for multiple bacterial sources of glycerol tetraether lipids in lakes								38.8231	39.7162	21.4607	0.091581
HB			11.0649	2.55458	0.356045	14.9355	14.6202	4.95915	5.64937	0.385255	0.185066	25.6699	16.4152	0.984833	1.84265	0.156663	0.220731	Redox-dependent niche differentiation provides evidence for multiple bacterial sources of glycerol tetraether lipids in lakes								13.9755	40.7345	45.29	0.233743
HS			15.3042	2.70051	0.496254	24.5508	12.7316	4.13386	4.31877	0.30727	0.173901	19.6661	13.477	0.581311	1.35794	0.0558975	0.144602	Redox-dependent niche differentiation provides evidence for multiple bacterial sources of glycerol tetraether lipids in lakes								18.501	46.2162	35.2828	0.199612
IF			6.70891	2.16751	0.590293	8.71597	10.6143	3.42799	5.03643	0.28456	0.404902	32.9021	24.4499	2.0397	1.68815	0.265454	0.703808	Redox-dependent niche differentiation provides evidence for multiple bacterial sources of glycerol tetraether lipids in lakes								9.46671	28.4841	62.0492	0.35367
KT			11.4829	5.82656	1.4001	13.8015	12.1113	7.34322	6.03624	0.729399	0.645421	15.9328	19.9787	1.62865	2.09946	0.418628	0.565148	Redox-dependent niche differentiation provides evidence for multiple bacterial sources of glycerol tetraether lipids in lakes								18.7095	40.6671	40.6233	0.461089
LD			8.60389	3.83505	0.687054	10.593	17.7913	6.03996	6.83258	0.372734	0.472884	20.0632	21.5224	0.995523	1.75996	0.140859	0.289636	Redox-dependent niche differentiation provides evidence for multiple bacterial sources of glycerol tetraether lipids in lakes								13.126	42.1025	44.7715	0.396858
LN			11.2442	6.47091	1.60928	14.158	12.4066	8.4369	6.75842	0.729153	0.702633	16.1677	16.7795	1.39785	2.24383	0.401626	0.4933	Redox-dependent niche differentiation provides evidence for multiple bacterial sources of glycerol tetraether lipids in lakes								19.3244	43.1917	37.4839	0.501411
LU			7.50949	2.80324	0.59903	8.33506	11.2914	4.33093	4.52672	0.311716	0.36123	17.7636	39.6797	1.11782	1.03935	0.111845	0.218924	Redox-dependent niche differentiation provides evidence for multiple bacterial sources of glycerol tetraether lipids in lakes								10.9118	29.157	59.9312	0.366696
LZ			14.3052	6.78237	0	17.2833	14.1232	8.39546	4.88582	0	0	18.0908	14.095	1.10451	0.934285	0	0	Redox-dependent niche differentiation provides evidence for multiple bacterial sources of glycerol tetraether lipids in lakes								21.0876	44.6878	34.2246	0.321628
MG			9.39285	1.99011	0.934384	18.8491	7.74312	4.66336	0.527615	1.04712	0	46.6442	7.00916	0.813893	0.185481	0.199656	0	Redox-dependent niche differentiation provides evidence for multiple bacterial sources of glycerol tetraether lipids in lakes								12.3173	32.8303	54.8524	0.313288
NB			8.49866	3.35759	0.829178	9.88065	13.2319	6.77735	4.59293	0.636203	0.37792	20.2532	28.1003	1.50687	1.34824	0.260039	0.348955	Redox-dependent niche differentiation provides evidence for multiple bacterial sources of glycerol tetraether lipids in lakes								12.6854	35.4969	51.8176	0.39541
OE			7.49901	5.63532	1.19644	8.7799	14.1836	7.80189	9.81941	0.500057	0.979684	17.0068	21.1893	1.53007	2.61221	0.409164	0.857111	Redox-dependent niche differentiation provides evidence for multiple bacterial sources of glycerol tetraether lipids in lakes								14.3308	42.0645	43.6047	0.560208
PS			15.4292	2.6751	0.710326	19.7347	8.03058	3.52799	2.48212	0.445523	0.122547	30.0244	14.7263	0.91337	0.897536	0.130492	0.149769	Redox-dependent niche differentiation provides evidence for multiple bacterial sources of glycerol tetraether lipids in lakes								18.8146	34.3435	46.8419	0.21769
RI			26.7589	3.54431	0.997499	28.0791	8.14312	2.75807	1.81776	0.547609	0.153491	15.7426	9.6484	0.588683	0.694702	0.258126	0.267593	Redox-dependent niche differentiation provides evidence for multiple bacterial sources of glycerol tetraether lipids in lakes								31.3007	41.4991	27.2002	0.176971
RO			14.66	4.92241	1.12734	17.2468	19.1427	5.73467	4.53269	0.52289	0.222733	16.3174	13.8241	0.804117	0.781648	0.0754536	0.0849934	Redox-dependent niche differentiation provides evidence for multiple bacterial sources of glycerol tetraether lipids in lakes								20.7098	47.4025	31.8877	0.346556
SI			9.51583	2.05592	1.05259	11.4319	9.15365	3.44108	1.64183	1.06568	0.150042	40.6487	17.1347	0.877346	1.3466	0.311108	0.173057	Redox-dependent niche differentiation provides evidence for multiple bacterial sources of glycerol tetraether lipids in lakes								12.6243	26.8842	60.4915	0.329609
SO			15.9829	5.13464	1.11647	18.4531	13.7377	7.77195	4.05101	0.593821	0.162154	18.9424	11.9107	1.01823	0.946927	0.108895	0.0690173	Redox-dependent niche differentiation provides evidence for multiple bacterial sources of glycerol tetraether lipids in lakes								22.234	44.7698	32.9962	0.331365
SV			13.7275	2.8803	0.797817	18.3334	10.2196	3.77563	2.54976	0.537758	0.190951	29.4214	15.3717	1.02427	0.787874	0.175624	0.206272	Redox-dependent niche differentiation provides evidence for multiple bacterial sources of glycerol tetraether lipids in lakes								17.4057	35.6072	46.9872	0.257154
TH			11.7023	7.425	1.7521	13.1261	12.8705	9.52493	7.83323	0.80764	0.774755	13.2512	16.1584	1.35239	2.43666	0.440616	0.544153	Redox-dependent niche differentiation provides evidence for multiple bacterial sources of glycerol tetraether lipids in lakes								20.8794	44.9372	34.1834	0.523445
TR			13.597	2.39421	1.07374	13.1583	10.8898	3.21127	4.69919	0.485467	0.542328	22.3773	22.0971	2.24371	1.91255	0.715555	0.602465	Redox-dependent niche differentiation provides evidence for multiple bacterial sources of glycerol tetraether lipids in lakes								17.0649	32.9864	49.9487	0.266142
VW			7.6738	2.48575	0.584299	8.59628	11.1638	3.84805	3.18709	0.325977	0.227465	26.2514	32.4679	1.55849	1.15496	0.250236	0.224431	Redox-dependent niche differentiation provides evidence for multiple bacterial sources of glycerol tetraether lipids in lakes								10.7439	27.3487	61.9075	0.340134
ZH			10.1614	3.43999	0.68237	10.5032	16.6217	4.22652	8.17299	0.318989	0.314254	19.7087	21.9884	0.800817	2.73237	0.138053	0.190256	Redox-dependent niche differentiation provides evidence for multiple bacterial sources of glycerol tetraether lipids in lakes								14.2837	40.1576	45.5587	0.336378
L1	46.0108	9.02027	8.04397	2.2085	0.629974	3.8017	12.4969	1.83372	3.72989	0.15848	0.3927	3.03187	61.9171	0.673327	0.817612	0.0480815	0.216129	Redox-dependent niche differentiation provides evidence for multiple bacterial sources of glycerol tetraether lipids in lakes								10.8824	22.4134	66.7042	0.31872
L2	46.0108	9.02027	2.66096	0.57008	0.138748	1.44871	6.05845	0.777144	0.882562	0.0480596	0.0807845	3.33456	82.9211	0.835151	0.175417	0.0259631	0.0423015	Redox-dependent niche differentiation provides evidence for multiple bacterial sources of glycerol tetraether lipids in lakes								3.36978	9.2957	87.3345	0.251522
L3	46.0108	9.02027	1.69138	0.363462	0.0857082	1.28338	4.10253	0.717739	0.605642	0.0463875	0.0724106	5.92083	84.1022	0.799831	0.155136	0.0218267	0.0315067	Redox-dependent niche differentiation provides evidence for multiple bacterial sources of glycerol tetraether lipids in lakes								2.14055	6.82809	91.0314	0.249879
L1	46.0108	9.02027	10.0676	2.54608	0.718432	3.71876	12.3614	1.5332	3.31022	0.239517	0.415775	2.78953	61.0477	0.642296	0.609436	5.45708e-10	5.45708e-10	Redox-dependent niche differentiation provides evidence for multiple bacterial sources of glycerol tetraether lipids in lakes								13.3321	21.5789	65.089	0.298748
L2	46.0108	9.02027	4.49854	1.03856	0.253751	2.02389	7.56876	1.04459	1.3978	0.0818812	0.141174	3.40345	77.3444	0.807063	0.288432	0.0290258	0.0786593	Redox-dependent niche differentiation provides evidence for multiple bacterial sources of glycerol tetraether lipids in lakes								5.79085	12.2581	81.9511	0.266983
L3	46.0108	9.02027	4.8185	1.26542	0.30352	4.90856	7.34033	2.05799	1.98594	0.150859	0.138701	22.6965	52.6882	0.891647	0.540392	0.0891647	0.12429	Redox-dependent niche differentiation provides evidence for multiple bacterial sources of glycerol tetraether lipids in lakes								6.38743	16.5824	77.0302	0.293147
L1	46.0108	9.02027	13.824	5.04825	1.46419	7.11474	13.124	3.38588	4.43002	0.483193	0.548564	4.10537	44.8403	0.718671	0.91277	6.28253e-10	6.28253e-10	Redox-dependent niche differentiation provides evidence for multiple bacterial sources of glycerol tetraether lipids in lakes								20.3364	29.0864	50.5771	0.392233
L2	46.0108	9.02027	6.22251	1.99515	0.461895	3.4041	8.91915	1.73193	2.20507	0.106098	0.202729	4.32129	69.008	0.795457	0.480609	0.0376997	0.108352	Redox-dependent niche differentiation provides evidence for multiple bacterial sources of glycerol tetraether lipids in lakes								8.67955	16.5691	74.7514	0.336301
L3	46.0108	9.02027	2.32658	0.59877	0.155528	1.79124	4.16095	1.00979	0.829652	0.0608919	0.0893081	8.90544	78.9058	0.877858	0.189019	0.0395797	0.0596233	Redox-dependent niche differentiation provides evidence for multiple bacterial sources of glycerol tetraether lipids in lakes								3.08088	7.94183	88.9773	0.295314
L1	46.0108	9.02027	13.2753	5.5079	1.50325	7.24187	13.3945	3.5448	4.93646	0.455042	0.582294	4.67843	43.033	0.63833	0.855219	0.112782	0.240869	Redox-dependent niche differentiation provides evidence for multiple bacterial sources of glycerol tetraether lipids in lakes								20.2865	30.1549	49.5586	0.419709
L2	46.0108	9.02027	6.69894	2.40029	0.602731	3.66859	9.0714	1.99041	2.38969	0.212109	0.303744	4.22054	67.026	0.799832	0.440589	0.0539554	0.121154	Redox-dependent niche differentiation provides evidence for multiple bacterial sources of glycerol tetraether lipids in lakes								9.70197	17.6359	72.6621	0.371652
L3	46.0108	9.02027	3.60942	1.12934	0.310708	2.80939	5.60018	1.574	1.28562	0.112934	0.14047	9.26541	72.7465	1.01957	0.258613	0.0502341	0.0876307	Redox-dependent niche differentiation provides evidence for multiple bacterial sources of glycerol tetraether lipids in lakes								5.04946	11.5226	83.4279	0.346721
L1	46.0108	9.02027	12.9088	4.94625	2.37878	6.17662	14.0044	2.89327	4.71581	0.388676	0.613468	3.75393	45.9524	0.558624	0.708979	1.04965e-09	1.04965e-09	Redox-dependent niche differentiation provides evidence for multiple bacterial sources of glycerol tetraether lipids in lakes								20.2339	28.7922	50.9739	0.479582
L2	46.0108	9.02027	5.87692	1.86039	0.510412	2.91495	8.71856	1.55052	1.9447	0.116665	0.169784	3.99055	71.1451	0.853198	0.348276	5.09487e-10	5.09487e-10	Redox-dependent niche differentiation provides evidence for multiple bacterial sources of glycerol tetraether lipids in lakes								8.24772	15.4152	76.3371	0.349334
L3	46.0108	9.02027	3.52312	1.17024	0.360169	2.77053	5.49971	1.56308	1.39354	0.114129	0.144729	11.2062	70.7105	1.09581	0.318404	0.0483809	0.0814618	Redox-dependent niche differentiation provides evidence for multiple bacterial sources of glycerol tetraether lipids in lakes								5.05353	11.4857	83.4608	0.37411
L1	46.0108	9.02027	13.6052	4.49885	2.03276	6.60182	14.929	2.45905	5.10924	0.143327	0.428009	4.53309	44.241	0.456299	0.96228	9.53563e-10	9.53563e-10	Redox-dependent niche differentiation provides evidence for multiple bacterial sources of glycerol tetraether lipids in lakes								20.1368	29.6705	50.1927	0.425308
L2	46.0108	9.02027	4.4821	1.19504	0.302225	2.19126	7.7302	1.26562	1.49988	0.0979116	0.15635	3.54787	76.16	0.879771	0.366834	0.0450466	0.0798897	Redox-dependent niche differentiation provides evidence for multiple bacterial sources of glycerol tetraether lipids in lakes								5.97937	12.9412	81.0794	0.30095
L3	46.0108	9.02027	3.67645	1.01206	0.359383	2.56112	5.96218	1.54218	1.28745	0.1063	0.155595	8.31676	73.3913	1.21722	0.290536	0.0415838	0.079863	Redox-dependent niche differentiation provides evidence for multiple bacterial sources of glycerol tetraether lipids in lakes								5.04789	11.6148	83.3373	0.342881
L1	46.0108	9.02027	17.2453	4.87588	1.14399	11.5368	16.0218	3.02703	5.39392	0.393356	0.433029	5.91275	32.0021	0.510807	1.09485	0.120283	0.288054	Redox-dependent niche differentiation provides evidence for multiple bacterial sources of glycerol tetraether lipids in lakes								23.2652	36.806	39.9289	0.307922
L2	46.0108	9.02027	9.20969	2.53787	0.575421	5.44332	10.8661	1.97956	2.8831	0.234505	0.288843	4.21028	60.2073	0.742706	0.610935	0.0696295	0.140731	Redox-dependent niche differentiation provides evidence for multiple bacterial sources of glycerol tetraether lipids in lakes								12.323	21.6955	65.9816	0.299336
L3	46.0108	9.02027	4.70873	1.24268	0.334568	3.36338	6.31961	1.6516	1.50998	0.1271	0.142147	8.95721	70.0999	1.05858	0.3505	0.0543451	0.079659	Redox-dependent niche differentiation provides evidence for multiple bacterial sources of glycerol tetraether lipids in lakes								6.28598	13.1138	80.6002	0.30414
L1	46.0108	9.02027	17.7207	4.93874	1.31509	9.55894	16.3808	2.45175	5.73675	0.374157	0.554172	4.77132	34.5254	0.476962	1.19519	1.63515e-09	1.63515e-09	Redox-dependent niche differentiation provides evidence for multiple bacterial sources of glycerol tetraether lipids in lakes								23.9746	35.0565	40.9689	0.315706
L2	46.0108	9.02027	7.52197	1.93036	0.438072	3.94783	9.56601	1.59049	2.24172	0.169027	0.228459	3.87723	67.0536	0.78758	0.469719	0.0637023	0.114227	Redox-dependent niche differentiation provides evidence for multiple bacterial sources of glycerol tetraether lipids in lakes								9.8904	17.7435	72.3661	0.28376
L3	46.0108	9.02027	3.61008	0.977638	0.289255	2.44409	4.91061	1.28707	1.08975	2.24312e-09	2.24312e-09	10.9199	73.0986	1.07181	0.300467	0.000224231	0.00044846	Redox-dependent niche differentiation provides evidence for multiple bacterial sources of glycerol tetraether lipids in lakes								4.87698	9.73153	85.3915	0.31908
L1	46.0108	9.02027	16.7314	5.45253	1.26577	7.17199	18.8934	2.79025	8.47987	0.310237	0.920566	3.58396	32.4014	0.448586	1.55009	5.49964e-10	5.49964e-10	Redox-dependent niche differentiation provides evidence for multiple bacterial sources of glycerol tetraether lipids in lakes								23.4497	38.5663	37.984	0.340476
L2	46.0108	9.02027	7.24053	2.11479	0.494825	3.61642	10.1705	1.51487	3.20155	0.159211	0.321961	3.86115	65.7624	0.757934	0.617537	0.0483402	0.117996	Redox-dependent niche differentiation provides evidence for multiple bacterial sources of glycerol tetraether lipids in lakes								9.85014	18.9845	71.1654	0.315167
L3	46.0108	9.02027	4.20857	1.12967	0.258052	3.33363	6.24641	1.82741	1.6059	0.0969079	0.135117	11.4074	67.7802	1.45085	0.388739	0.0572587	0.0738715	Redox-dependent niche differentiation provides evidence for multiple bacterial sources of glycerol tetraether lipids in lakes								5.59629	13.2454	81.1583	0.294083
L1	46.0108	9.02027	14.8856	5.26332	1.18558	7.14881	19.1647	2.70655	9.19581	0.264592	1.54646	3.9808	32.5526	0.419041	1.68608	8.97439e-10	8.97439e-10	Redox-dependent niche differentiation provides evidence for multiple bacterial sources of glycerol tetraether lipids in lakes								21.3345	40.027	38.6386	0.357847
L2	46.0108	9.02027	7.35399	2.20588	0.551293	3.55275	10.9144	1.68676	3.77612	0.131888	0.463482	4.01717	63.6621	0.753324	0.724414	0.0316689	0.174706	Redox-dependent niche differentiation provides evidence for multiple bacterial sources of glycerol tetraether lipids in lakes								10.1112	20.5255	69.3634	0.327209
L3	46.0108	9.02027	3.67331	1.04738	0.252867	2.90274	5.61096	1.69077	1.67955	0.117082	0.178054	13.5411	67.3315	1.41022	0.392767	0.0677056	0.10399	Redox-dependent niche differentiation provides evidence for multiple bacterial sources of glycerol tetraether lipids in lakes								4.97355	12.1791	82.8473	0.312274
L1	46.0108	9.02027	17.1083	5.76424	1.28249	7.06724	18.6549	2.58144	8.632	0.326759	0.932229	3.76798	31.8885	0.398068	1.59586	7.27301e-10	7.27301e-10	Redox-dependent niche differentiation provides evidence for multiple bacterial sources of glycerol tetraether lipids in lakes								24.155	38.1946	37.6505	0.344824
L2	46.0108	9.02027	7.67808	2.45619	0.572584	3.51523	10.9879	1.64241	3.94866	0.1635	0.491524	3.89333	62.9001	0.749686	0.765426	0.041719	0.19367	Redox-dependent niche differentiation provides evidence for multiple bacterial sources of glycerol tetraether lipids in lakes								10.7069	20.7492	68.5439	0.33636
L3	46.0108	9.02027	3.25858	1.02115	0.252361	2.90085	5.39194	1.63254	1.69758	0.106018	0.154799	15.2197	66.3423	1.4049	0.444233	0.068944	0.104066	Redox-dependent niche differentiation provides evidence for multiple bacterial sources of glycerol tetraether lipids in lakes								4.53209	11.8837	83.5842	0.336682
L1	46.0108	9.02027	16.2234	5.89263	1.46794	6.70419	18.1793	2.68993	8.93567	0.307174	0.928565	3.74345	33.0382	0.349777	1.53978	6.06505e-10	6.06505e-10	Redox-dependent niche differentiation provides evidence for multiple bacterial sources of glycerol tetraether lipids in lakes								23.5839	37.7448	38.6712	0.374344
L2	46.0108	9.02027	7.2395	2.33226	0.515471	3.16407	10.8755	1.62147	3.92352	0.151627	0.419793	3.77938	64.2208	0.767835	0.737491	0.0532403	0.198026	Redox-dependent niche differentiation provides evidence for multiple bacterial sources of glycerol tetraether lipids in lakes								10.0872	20.156	69.7568	0.333411
L3	46.0108	9.02027	4.30506	1.35895	0.303429	3.26769	6.87253	1.90097	2.29776	0.139785	0.250005	13.8488	63.2792	1.4575	0.529055	0.0648352	0.124484	Redox-dependent niche differentiation provides evidence for multiple bacterial sources of glycerol tetraether lipids in lakes								5.96743	14.7287	79.3038	0.329422
L1	46.0108	9.02027	9.15908	2.95445	0.725901	3.84381	11.943	1.49756	4.82153	0.1682	0.474328	2.99922	59.8835	0.553374	0.976009	1.0927e-09	1.0927e-09	Redox-dependent niche differentiation provides evidence for multiple bacterial sources of glycerol tetraether lipids in lakes								12.8394	22.7485	64.4121	0.343181
L2	46.0108	9.02027	6.29109	2.04066	0.493392	3.01511	9.6161	1.59298	3.32341	0.124616	0.36055	4.78862	66.6051	0.908055	0.624501	0.0373068	0.178501	Redox-dependent niche differentiation provides evidence for multiple bacterial sources of glycerol tetraether lipids in lakes								8.82514	18.0328	73.1421	0.343047
L3	46.0108	9.02027	6.29408	1.56577	0.353441	6.31145	10.506	2.71982	2.5599	0.18181	0.183312	15.9214	51.25	1.30017	0.632496	0.0911757	0.129227	Redox-dependent niche differentiation provides evidence for multiple bacterial sources of glycerol tetraether lipids in lakes								8.21329	22.4623	69.3244	0.276704
L1	46.0108	9.02027	18.304	6.84005	1.47688	7.60683	19.5078	2.75447	9.90634	0.368485	0.918749	3.91863	26.1847	0.453885	1.75918	6.90087e-10	6.90087e-10	Redox-dependent niche differentiation provides evidence for multiple bacterial sources of glycerol tetraether lipids in lakes								26.6209	41.0626	32.3164	0.367899
L2	46.0108	9.02027	5.4414	1.7241	0.397287	2.32611	8.623	1.24472	2.78908	0.104074	0.270815	2.8122	72.8631	0.707998	0.506462	0.0382026	0.151487	Redox-dependent niche differentiation provides evidence for multiple bacterial sources of glycerol tetraether lipids in lakes								7.56279	15.3578	77.0794	0.333035
L3	46.0108	9.02027	5.55301	1.75416	0.358532	4.26489	8.97751	2.37091	3.10449	0.117722	0.252007	10.4928	60.1934	1.81288	0.554901	0.0643369	0.128406	Redox-dependent niche differentiation provides evidence for multiple bacterial sources of glycerol tetraether lipids in lakes								7.6657	19.0875	73.2468	0.322374
L1	46.0108	9.02027	18.3327	6.53168	1.42704	9.29249	18.7592	2.7734	8.16514	0.397444	0.7525	4.50575	27.0862	0.361548	1.61486	5.00006e-10	5.00006e-10	Redox-dependent niche differentiation provides evidence for multiple bacterial sources of glycerol tetraether lipids in lakes								26.2914	40.1402	33.5684	0.35699
L2	46.0108	9.02027	7.1788	2.13812	0.495285	3.21623	9.08863	1.29649	2.83561	0.0994017	0.254181	3.32217	68.7288	0.667364	0.518281	0.0245498	0.136069	Redox-dependent niche differentiation provides evidence for multiple bacterial sources of glycerol tetraether lipids in lakes								9.8122	16.7905	73.3973	0.318857
L3	46.0108	9.02027	5.22949	1.6502	0.353745	4.23201	8.46051	2.33084	2.61004	0.130128	0.226018	10.7395	61.4791	1.82112	0.510532	0.0833574	0.14342	Redox-dependent niche differentiation provides evidence for multiple bacterial sources of glycerol tetraether lipids in lakes								7.23344	17.9895	74.777	0.325944
L1	46.0108	9.02027	17.7967	6.32642	1.35298	8.36808	18.5383	2.81386	8.81278	0.432846	0.854255	4.43829	27.5713	0.461755	1.71073	0.0845391	0.437096	Redox-dependent niche differentiation provides evidence for multiple bacterial sources of glycerol tetraether lipids in lakes								25.4761	39.8201	34.7037	0.354543
L2	46.0108	9.02027	5.76208	1.81041	0.434141	2.78701	8.63279	1.27538	2.60389	0.105217	0.248416	3.62849	71.3055	0.767961	0.492238	0.0226695	0.12381	Redox-dependent niche differentiation provides evidence for multiple bacterial sources of glycerol tetraether lipids in lakes								8.00664	15.6527	76.3407	0.334559
L3	46.0108	9.02027	4.9626	1.61657	0.338048	4.10028	8.41246	2.36078	2.4719	0.117755	0.205379	10.8472	62.0545	1.79435	0.48968	0.0916772	0.136817	Redox-dependent niche differentiation provides evidence for multiple bacterial sources of glycerol tetraether lipids in lakes								6.91722	17.6685	75.4142	0.331443
L1	46.0108	9.02027	18.1303	6.24481	1.50067	8.37328	18.6367	2.76619	9.05841	0.498448	0.934105	4.61103	27.1887	0.3597	1.6977	9.70332e-10	9.70332e-10	Redox-dependent niche differentiation provides evidence for multiple bacterial sources of glycerol tetraether lipids in lakes								25.8757	40.2671	33.8571	0.357329
L2	46.0108	9.02027	5.50511	1.56668	0.36225	3.75419	7.88452	1.3618	2.31265	0.118431	0.20692	5.35136	70.1246	0.805893	0.488568	0.0414028	0.115629	Redox-dependent niche differentiation provides evidence for multiple bacterial sources of glycerol tetraether lipids in lakes								7.43404	15.6385	76.9274	0.308201
L3	46.0108	9.02027	5.10491	1.65054	0.352243	4.37604	8.17502	2.52797	2.40145	0.140093	0.218291	11.9665	60.5744	1.85034	0.462605	0.0678623	0.131763	Redox-dependent niche differentiation provides evidence for multiple bacterial sources of glycerol tetraether lipids in lakes								7.10769	17.8389	75.0534	0.331335
L1	46.0108	9.02027	15.9798	6.03232	1.37003	7.3825	18.2366	3.25725	8.961	0.376048	0.935859	4.68652	30.1009	0.487812	1.65476	0.106967	0.431682	Redox-dependent niche differentiation provides evidence for multiple bacterial sources of glycerol tetraether lipids in lakes								23.3821	39.1493	37.4686	0.375175
L2	46.0108	9.02027	5.11153	1.53789	0.351429	2.82059	8.26934	1.2448	2.45056	0.109548	0.249135	3.64464	72.7546	0.773947	0.51172	0.0406387	0.129642	Redox-dependent niche differentiation provides evidence for multiple bacterial sources of glycerol tetraether lipids in lakes								7.00084	15.144	77.8552	0.320068
L3	46.0108	9.02027	4.98603	1.6031	0.345588	4.42835	8.3086	2.60587	2.449	0.126697	0.209713	11.5799	60.6592	1.95242	0.532385	0.0699631	0.143229	Redox-dependent niche differentiation provides evidence for multiple bacterial sources of glycerol tetraether lipids in lakes								6.93472	18.1282	74.937	0.330839
L1	46.0108	9.02027	11.4788	3.90512	0.873116	5.25618	13.9276	2.35009	5.67751	0.278979	0.622244	4.37703	49.7944	0.445143	1.01382	1.20784e-09	1.20784e-09	Redox-dependent niche differentiation provides evidence for multiple bacterial sources of glycerol tetraether lipids in lakes								16.257	28.1126	55.6304	0.347625
L2	46.0108	9.02027	4.65789	1.40349	0.31173	2.6724	7.74203	1.37883	2.16374	0.103193	0.204888	4.18797	73.5749	0.941677	0.496198	0.04499	0.116111	Redox-dependent niche differentiation provides evidence for multiple bacterial sources of glycerol tetraether lipids in lakes								6.37312	14.2651	79.3618	0.318048
L3	46.0108	9.02027	4.51265	1.41574	0.299504	3.89828	7.87331	2.29528	2.11668	0.11503	0.168462	9.52774	65.342	1.79296	0.458056	0.0645886	0.119671	Redox-dependent niche differentiation provides evidence for multiple bacterial sources of glycerol tetraether lipids in lakes								6.22789	16.467	77.3051	0.323504
L1	46.0108	9.02027	6.38697	1.95699	0.420911	3.26523	9.95414	1.62967	3.06183	0.160911	0.351757	4.02078	67.3134	0.613589	0.647918	0.0515126	0.164341	Redox-dependent niche differentiation provides evidence for multiple bacterial sources of glycerol tetraether lipids in lakes								8.76487	18.4235	72.8116	0.319321
L2	46.0108	9.02027	4.52764	1.33097	0.302488	2.86131	7.84168	1.63493	2.10028	0.128012	0.218138	5.8626	71.5433	1.05332	0.429226	0.0458267	0.120304	Redox-dependent niche differentiation provides evidence for multiple bacterial sources of glycerol tetraether lipids in lakes								6.16109	14.7843	79.0546	0.314221
L3	46.0108	9.02027	4.32266	1.27496	0.271872	3.5325	7.56807	2.22791	1.88498	0.119073	0.186232	9.08198	67.3014	1.66208	0.397195	0.0651558	0.103891	Redox-dependent niche differentiation provides evidence for multiple bacterial sources of glycerol tetraether lipids in lakes								5.8695	15.5188	78.6118	0.309857
L1	46.0108	9.02027	5.20899	1.23308	0.247626	1.85778	8.78841	0.842578	1.7216	0.0800784	0.207866	2.26141	76.5381	0.655566	0.356881	3.09175e-10	3.09175e-10	Redox-dependent niche differentiation provides evidence for multiple bacterial sources of glycerol tetraether lipids in lakes								6.68969	13.4983	79.812	0.258357
L2	46.0108	9.02027	3.42061	0.792781	0.163906	2.33231	6.44958	1.51454	1.13396	0.0785348	0.115804	7.086	75.2274	1.34598	0.23601	0.0419436	0.0606337	Redox-dependent niche differentiation provides evidence for multiple bacterial sources of glycerol tetraether lipids in lakes								4.37729	11.6247	83.998	0.256001
L3	46.0108	9.02027	3.4796	0.908741	0.200329	3.25318	6.63003	2.29464	1.30683	0.0948016	0.118419	10.0724	69.2179	1.97311	0.304765	0.0677945	0.0774457	Redox-dependent niche differentiation provides evidence for multiple bacterial sources of glycerol tetraether lipids in lakes								4.58867	13.6979	81.7134	0.285355
SF16-1A-0	44.9815	4.17058	14.6055	4.58422	1.0661	21.9616	13.2196	7.78252	3.3049	0.746269	0.319829	19.5096	10.9808	0.959488	0.746269	0.10661	0.10661	Impact of human activities and vegetation changes on the tetraether sources in Lake St Front (Massif Central, France) sources in Lake St Front (Massif Central, France)t of human activities and vegetation changes on the tetraether								20.2559	47.3348	32.4094	0.331579
SF16-1A-4	44.9815	4.17058	14.6211	4.69584	1.06724	21.7716	13.3404	7.89755	3.30843	0.747065	0.213447	19.5304	10.8858	0.960512	0.747065	0.106724	0.106724	Impact of human activities and vegetation changes on the tetraether sources in Lake St Front (Massif Central, France) sources in Lake St Front (Massif Central, France)t of human activities and vegetation changes on the tetraether								20.3842	47.2785	32.3372	0.335079
SF16-1A-8	44.9815	4.17058	14.8504	4.70085	1.17521	22.1154	13.2479	7.90598	3.31197	0.747863	0.320513	18.8034	10.8974	0.961538	0.747863	0.106838	0.106838	Impact of human activities and vegetation changes on the tetraether sources in Lake St Front (Massif Central, France) sources in Lake St Front (Massif Central, France)t of human activities and vegetation changes on the tetraether								20.7265	47.6496	31.6239	0.340206
SF16-1A-15	44.9815	4.17058	14.5766	4.93033	1.17899	22.0793	12.9689	8.03859	3.32262	0.750268	0.321543	18.8639	10.9325	1.07181	0.750268	0.107181	0.107181	Impact of human activities and vegetation changes on the tetraether sources in Lake St Front (Massif Central, France) sources in Lake St Front (Massif Central, France)t of human activities and vegetation changes on the tetraether								20.686	47.4812	31.8328	0.352332
SF16-1A-25	44.9815	4.17058	16.3462	5.23504	1.17521	23.2906	12.2863	7.79915	3.20513	0.747863	0.42735	17.735	9.9359	0.961538	0.641026	0.106838	0.106838	Impact of human activities and vegetation changes on the tetraether sources in Lake St Front (Massif Central, France) sources in Lake St Front (Massif Central, France)t of human activities and vegetation changes on the tetraether								22.7564	47.7564	29.4872	0.333333
SF16-1A-35	44.9815	4.17058	17.8038	5.33049	1.27932	23.3475	12.7932	7.67591	2.66525	0.852878	0.319829	16.7377	9.48827	0.959488	0.533049	0.10661	0.10661	Impact of human activities and vegetation changes on the tetraether sources in Lake St Front (Massif Central, France) sources in Lake St Front (Massif Central, France)t of human activities and vegetation changes on the tetraether								24.4136	47.6546	27.9318	0.323144
SF16-1A-45	44.9815	4.17058	17.8723	5.21277	1.38298	22.8723	13.2979	7.65957	2.34043	0.851064	0.212766	16.7021	9.89362	0.957447	0.531915	0.106383	0.106383	Impact of human activities and vegetation changes on the tetraether sources in Lake St Front (Massif Central, France) sources in Lake St Front (Massif Central, France)t of human activities and vegetation changes on the tetraether								24.4681	47.234	28.2979	0.326087
SF16-1A-55	44.9815	4.17058	23.6097	5.56139	1.46905	26.9675	11.1228	5.35152	1.67891	0.734523	0.104932	14.7954	7.34523	0.629591	0.419727	0.104932	0.104932	Impact of human activities and vegetation changes on the tetraether sources in Lake St Front (Massif Central, France) sources in Lake St Front (Massif Central, France)t of human activities and vegetation changes on the tetraether								30.6401	45.9601	23.3998	0.277397
SFB2-5	44.9815	4.17058	23.9244	5.56139	1.46905	27.702	10.3882	5.98111	1.67891	0.839454	0.104932	14.4806	6.9255	0.524659	0.314795	0.104932	0	Impact of human activities and vegetation changes on the tetraether sources in Lake St Front (Massif Central, France) sources in Lake St Front (Massif Central, France)t of human activities and vegetation changes on the tetraether								30.9549	46.6946	22.3505	0.274576
SFB2-15	44.9815	4.17058	24.3469	5.74713	1.4629	27.7952	10.3448	5.64263	1.67189	0.835946	0.104493	14.2111	6.89655	0.522466	0.31348	0.104493	0	Impact of human activities and vegetation changes on the tetraether sources in Lake St Front (Massif Central, France) sources in Lake St Front (Massif Central, France)t of human activities and vegetation changes on the tetraether								31.5569	46.395	22.0481	0.274834
SFB2-25	44.9815	4.17058	24.2932	5.75916	1.57068	28.0628	10.5759	5.54974	1.57068	0.837696	0.104712	13.7173	7.01571	0.418848	0.314136	0.104712	0.104712	Impact of human activities and vegetation changes on the tetraether sources in Lake St Front (Massif Central, France) sources in Lake St Front (Massif Central, France)t of human activities and vegetation changes on the tetraether								31.623	46.7016	21.6754	0.281457
SFB2-35	44.9815	4.17058	23.7448	5.54393	1.35983	27.4059	11.0879	5.23013	1.46444	0.732218	0.104603	14.8536	7.53138	0.523013	0.313808	0.104603	0	Impact of human activities and vegetation changes on the tetraether sources in Lake St Front (Massif Central, France) sources in Lake St Front (Massif Central, France)t of human activities and vegetation changes on the tetraether								30.6485	46.0251	23.3264	0.269625
SFB2-55	44.9815	4.17058	23.6705	5.63087	1.45985	28.78	10.219	5.63087	1.45985	0.834202	0.104275	14.4943	6.77789	0.521376	0.312826	0.104275	0	Impact of human activities and vegetation changes on the tetraether sources in Lake St Front (Massif Central, France) sources in Lake St Front (Massif Central, France)t of human activities and vegetation changes on the tetraether								30.7612	47.0282	22.2106	0.277966
SFB2-65	44.9815	4.17058	22.9885	5.74713	1.67189	28.1087	10.3448	5.64263	1.4629	0.835946	0.104493	14.838	7.31452	0.522466	0.31348	0.104493	0	Impact of human activities and vegetation changes on the tetraether sources in Lake St Front (Massif Central, France) sources in Lake St Front (Massif Central, France)t of human activities and vegetation changes on the tetraether								30.4075	46.4995	23.093	0.298969
SFB2-75	44.9815	4.17058	22.5235	5.52659	1.56413	28.3629	10.1147	5.94369	1.45985	0.938478	0	15.2242	7.40355	0.521376	0.312826	0.104275	0	Impact of human activities and vegetation changes on the tetraether sources in Lake St Front (Massif Central, France) sources in Lake St Front (Massif Central, France)t of human activities and vegetation changes on the tetraether								29.6142	46.8196	23.5662	0.292254
SFB2-85	44.9815	4.17058	22.2917	5.3125	1.45833	27.0833	11.0417	5.83333	1.5625	0.833333	0.104167	15.2083	8.33333	0.520833	0.3125	0.104167	0	Impact of human activities and vegetation changes on the tetraether sources in Lake St Front (Massif Central, France) sources in Lake St Front (Massif Central, France)t of human activities and vegetation changes on the tetraether								29.0625	46.4583	24.4792	0.283154
SFB2-90	44.9815	4.17058	22.2106	5.00521	1.45985	27.4244	11.0532	5.83942	1.77268	0.729927	0.104275	15.2242	8.13347	0.521376	0.312826	0.104275	0.104275	Impact of human activities and vegetation changes on the tetraether sources in Lake St Front (Massif Central, France) sources in Lake St Front (Massif Central, France)t of human activities and vegetation changes on the tetraether								28.6757	46.9239	24.4004	0.276364
SF16-2B-1-14	44.9815	4.17058	23.0608	4.50734	1.15304	26.1006	11.5304	5.24109	1.99161	0.733753	0.104822	15.304	9.01468	0.628931	0.419287	0.104822	0.104822	Impact of human activities and vegetation changes on the tetraether sources in Lake St Front (Massif Central, France) sources in Lake St Front (Massif Central, France)t of human activities and vegetation changes on the tetraether								28.7212	45.7023	25.5765	0.237226
SF16-2B-1-20	44.9815	4.17058	22.0106	4.02116	0.952381	26.7725	11.5344	5.07937	1.90476	0.634921	0.10582	16.1905	9.62963	0.529101	0.42328	0.10582	0.10582	Impact of human activities and vegetation changes on the tetraether sources in Lake St Front (Massif Central, France) sources in Lake St Front (Massif Central, France)t of human activities and vegetation changes on the tetraether								26.9841	46.0317	26.9841	0.219608
SF16-2B-1-25	44.9815	4.17058	23.5908	4.48852	1.14823	26.5136	11.2735	5.21921	1.9833	0.730689	0.104384	15.3445	8.24635	0.730689	0.417537	0.104384	0.104384	Impact of human activities and vegetation changes on the tetraether sources in Lake St Front (Massif Central, France) sources in Lake St Front (Massif Central, France)t of human activities and vegetation changes on the tetraether								29.2276	45.8246	24.9478	0.232143
SF16-2B-1-29	44.9815	4.17058	23.9833	4.58811	1.2513	26.6945	11.1575	5.21376	1.87696	0.729927	0.104275	15.1199	8.0292	0.625652	0.417101	0.104275	0.104275	Impact of human activities and vegetation changes on the tetraether sources in Lake St Front (Massif Central, France) sources in Lake St Front (Massif Central, France)t of human activities and vegetation changes on the tetraether								29.8227	45.7769	24.4004	0.237762
SF16-2B-1-35	44.9815	4.17058	24.3469	4.70219	1.25392	27.2727	10.8673	5.01567	1.88088	0.731452	0.104493	14.838	7.83699	0.626959	0.417973	0.104493	0	Impact of human activities and vegetation changes on the tetraether sources in Lake St Front (Massif Central, France) sources in Lake St Front (Massif Central, France)t of human activities and vegetation changes on the tetraether								30.303	45.8725	23.8245	0.237931
SF16-2B-1-40	44.9815	4.17058	24.2424	4.70219	1.25392	26.8548	10.9718	5.01567	1.77638	0.626959	0.104493	15.1515	8.04598	0.522466	0.522466	0.104493	0.104493	Impact of human activities and vegetation changes on the tetraether sources in Lake St Front (Massif Central, France) sources in Lake St Front (Massif Central, France)t of human activities and vegetation changes on the tetraether								30.1985	45.3501	24.4514	0.238754
SF16-2B-1-45	44.9815	4.17058	23.9583	4.6875	1.35417	26.6667	10.9375	5.10417	1.875	0.729167	0.104167	15.1042	8.125	0.729167	0.416667	0.104167	0.104167	Impact of human activities and vegetation changes on the tetraether sources in Lake St Front (Massif Central, France) sources in Lake St Front (Massif Central, France)t of human activities and vegetation changes on the tetraether								30	45.4167	24.5833	0.246528
SF16-2B-1-50	44.9815	4.17058	25	4.6875	1.35417	27.6042	10.625	4.79167	1.77083	0.729167	0.104167	14.5833	7.60417	0.520833	0.416667	0.104167	0.104167	Impact of human activities and vegetation changes on the tetraether sources in Lake St Front (Massif Central, France) sources in Lake St Front (Massif Central, France)t of human activities and vegetation changes on the tetraether								31.0417	45.625	23.3333	0.238255
SF16-2B-1-55	44.9815	4.17058	24.8434	4.80167	1.35699	27.2443	10.8559	4.69729	1.77453	0.626305	0.104384	14.6138	7.82881	0.626305	0.417537	0.104384	0.104384	Impact of human activities and vegetation changes on the tetraether sources in Lake St Front (Massif Central, France) sources in Lake St Front (Massif Central, France)t of human activities and vegetation changes on the tetraether								31.0021	45.3027	23.6952	0.242424
SF16-2B-1-60	44.9815	4.17058	24.8175	4.69239	1.35558	27.4244	10.7404	4.79666	1.87696	0.625652	0.104275	14.5985	7.82065	0.625652	0.417101	0.104275	0	Impact of human activities and vegetation changes on the tetraether sources in Lake St Front (Massif Central, France) sources in Lake St Front (Massif Central, France)t of human activities and vegetation changes on the tetraether								30.8655	45.5683	23.5662	0.239865
SF16-2B-1-65	44.9815	4.17058	24.6347	4.69729	1.25261	26.7223	11.0647	4.90605	1.87891	0.626305	0.104384	14.9269	7.93319	0.626305	0.417537	0.104384	0.104384	Impact of human activities and vegetation changes on the tetraether sources in Lake St Front (Massif Central, France) sources in Lake St Front (Massif Central, France)t of human activities and vegetation changes on the tetraether								30.5846	45.3027	24.1127	0.235495
SF16-2B-1-70	44.9815	4.17058	24.7917	4.58333	1.25	26.9792	11.0417	4.79167	1.77083	0.625	0.104167	15	7.91667	0.520833	0.416667	0.104167	0.104167	Impact of human activities and vegetation changes on the tetraether sources in Lake St Front (Massif Central, France) sources in Lake St Front (Massif Central, France)t of human activities and vegetation changes on the tetraether								30.625	45.3125	24.0625	0.231293
SF16-2B-1-79	44.9815	4.17058	25.523	4.70711	1.25523	26.1506	11.5063	4.2887	1.98745	0.627615	0	13.2845	9.62343	0.523013	0.41841	0.104603	0	Impact of human activities and vegetation changes on the tetraether sources in Lake St Front (Massif Central, France) sources in Lake St Front (Massif Central, France)t of human activities and vegetation changes on the tetraether								31.4854	44.5607	23.954	0.229236
SF16-2B-2-54	44.9815	4.17058	28.7785	5.59006	1.5528	28.5714	9.31677	3.62319	1.5528	0.621118	0.10352	13.7681	5.69358	0.414079	0.310559	0.10352	0	Impact of human activities and vegetation changes on the tetraether sources in Lake St Front (Massif Central, France) sources in Lake St Front (Massif Central, France)t of human activities and vegetation changes on the tetraether								35.9213	43.7888	20.2899	0.242075
SF16-2B-2-60	44.9815	4.17058	27.3105	5.50363	1.55763	28.2451	9.65732	3.63448	1.66147	0.623053	0.103842	14.2264	6.33437	0.519211	0.415369	0.103842	0.103842	Impact of human activities and vegetation changes on the tetraether sources in Lake St Front (Massif Central, France) sources in Lake St Front (Massif Central, France)t of human activities and vegetation changes on the tetraether								34.3718	43.9252	21.703	0.250755
SF16-2B-2-69	44.9815	4.17058	23.0448	4.79666	1.2513	24.2961	12.7216	4.37956	2.29406	0.625652	0.208551	15.3285	9.80188	0.521376	0.521376	0.104275	0.104275	Impact of human activities and vegetation changes on the tetraether sources in Lake St Front (Massif Central, France) sources in Lake St Front (Massif Central, France)t of human activities and vegetation changes on the tetraether								29.0928	44.5255	26.3816	0.250896
SF16-2B-2-81.5	44.9815	4.17058	24.3697	4.93697	1.15546	26.9958	11.2395	4.41176	1.68067	0.630252	0.105042	15.5462	7.77311	0.630252	0.420168	0.105042	0	Impact of human activities and vegetation changes on the tetraether sources in Lake St Front (Massif Central, France) sources in Lake St Front (Massif Central, France)t of human activities and vegetation changes on the tetraether								30.4622	45.063	24.4748	0.237931
SF16-2B-2-90	44.9815	4.17058	25.1046	4.91632	1.15063	26.9874	10.7741	4.1841	1.56904	0.627615	0.104603	15.8996	7.53138	0.627615	0.41841	0.104603	0	Impact of human activities and vegetation changes on the tetraether sources in Lake St Front (Massif Central, France) sources in Lake St Front (Massif Central, France)t of human activities and vegetation changes on the tetraether								31.1715	44.2469	24.5816	0.231544
SF16-2C-8	44.9815	4.17058	21.5873	4.2328	0.952381	25.6085	10.4762	5.82011	1.90476	0.634921	0.10582	19.6825	7.51323	0.740741	0.529101	0.10582	0.10582	Impact of human activities and vegetation changes on the tetraether sources in Lake St Front (Massif Central, France) sources in Lake St Front (Massif Central, France)t of human activities and vegetation changes on the tetraether								26.7725	44.5503	28.6772	0.229249
SF16-2C-15	44.9815	4.17058	20.1699	3.50318	0.7431	26.327	10.828	4.88323	1.59236	0.530786	0.106157	20.913	9.23567	0.636943	0.424628	0.106157	0	Impact of human activities and vegetation changes on the tetraether sources in Lake St Front (Massif Central, France) sources in Lake St Front (Massif Central, France)t of human activities and vegetation changes on the tetraether								24.4161	44.2675	31.3163	0.204348
SF16-2C-25	44.9815	4.17058	19.7183	3.03359	0.541712	24.5937	12.351	4.98375	2.27519	0.541712	0.108342	18.9599	11.4843	0.758397	0.541712	0.108342	0	Impact of human activities and vegetation changes on the tetraether sources in Lake St Front (Massif Central, France) sources in Lake St Front (Massif Central, France)t of human activities and vegetation changes on the tetraether								23.2936	44.8537	31.8527	0.176744
SF16-2C-35	44.9815	4.17058	22.7033	4.11827	0.844773	24.9208	12.4604	4.75185	1.90074	0.527983	0.105597	16.8955	9.5037	0.739176	0.422386	0.105597	0	Impact of human activities and vegetation changes on the tetraether sources in Lake St Front (Massif Central, France) sources in Lake St Front (Massif Central, France)t of human activities and vegetation changes on the tetraether								27.6663	44.6674	27.6663	0.209924
SF16-2C-45	44.9815	4.17058	23.2558	4.65116	1.16279	26.4271	9.30233	6.23679	1.90275	0.739958	0.105708	18.3932	6.4482	0.845666	0.422833	0.105708	0	Impact of human activities and vegetation changes on the tetraether sources in Lake St Front (Massif Central, France) sources in Lake St Front (Massif Central, France)t of human activities and vegetation changes on the tetraether								29.0698	44.7146	26.2156	0.24
SFB4-15	44.9786	4.17317	23.548	4.85744	1.16156	26.188	9.3981	6.44139	1.68955	0.739176	0.105597	17.7402	6.65259	0.739176	0.527983	0.105597	0.105597	Impact of human activities and vegetation changes on the tetraether sources in Lake St Front (Massif Central, France) sources in Lake St Front (Massif Central, France)t of human activities and vegetation changes on the tetraether								29.5671	44.5618	25.8712	0.242857
SFB4-25	44.9786	4.17317	22.4576	4.55508	1.16525	25.9534	9.74576	6.67373	2.01271	0.635593	0.211864	18.5381	6.67373	0.741525	0.423729	0.105932	0.105932	Impact of human activities and vegetation changes on the tetraether sources in Lake St Front (Massif Central, France) sources in Lake St Front (Massif Central, France)t of human activities and vegetation changes on the tetraether								28.178	45.2331	26.589	0.244361
SF16-2C-54	44.9815	4.17058	22.234	4.14894	0.957447	25.6383	9.89362	7.12766	1.59574	0.638298	0.106383	19.2553	7.02128	0.851064	0.425532	0.106383	0	Impact of human activities and vegetation changes on the tetraether sources in Lake St Front (Massif Central, France) sources in Lake St Front (Massif Central, France)t of human activities and vegetation changes on the tetraether								27.3404	45	27.6596	0.22179
SFB4-35	44.9786	4.17317	28.6019	4.69584	0.960512	25.8271	10.6724	5.01601	1.8143	0.640342	0.106724	14.301	6.40342	0.533618	0.320171	0.106724	0	Impact of human activities and vegetation changes on the tetraether sources in Lake St Front (Massif Central, France) sources in Lake St Front (Massif Central, France)t of human activities and vegetation changes on the tetraether								34.2583	44.0768	21.6649	0.193146
SF16-2C-65	44.9815	4.17058	30.6962	3.79747	0.738397	28.1646	10.1266	4.00844	1.37131	0.421941	0.105485	13.3966	6.32911	0.421941	0.316456	0.105485	0	Impact of human activities and vegetation changes on the tetraether sources in Lake St Front (Massif Central, France) sources in Lake St Front (Massif Central, France)t of human activities and vegetation changes on the tetraether								35.2321	44.1983	20.5696	0.149701
SFB4-45 40	44.9786	4.17317	33.0517	4.32946	0.844773	27.5607	9.82049	4.22386	1.47835	0.527983	0.105597	11.2988	5.91341	0.422386	0.31679	0.105597	0	Impact of human activities and vegetation changes on the tetraether sources in Lake St Front (Massif Central, France) sources in Lake St Front (Massif Central, France)t of human activities and vegetation changes on the tetraether								38.226	43.717	18.057	0.157459
SF16-2C-74	44.9815	4.17058	25.6684	4.17112	0.855615	24.1711	13.369	5.34759	1.39037	0.641711	0.106952	13.7968	9.19786	0.748663	0.427807	0.106952	0	Impact of human activities and vegetation changes on the tetraether sources in Lake St Front (Massif Central, France) sources in Lake St Front (Massif Central, France)t of human activities and vegetation changes on the tetraether								30.6952	45.0267	24.2781	0.191638
SFB4-55	44.9786	4.17317	25.4797	4.58422	0.959488	24.0938	13.0064	6.28998	1.59915	0.746269	0	13.6461	8.31557	0.746269	0.426439	0.10661	0	Impact of human activities and vegetation changes on the tetraether sources in Lake St Front (Massif Central, France) sources in Lake St Front (Massif Central, France)t of human activities and vegetation changes on the tetraether								31.0235	45.7356	23.2409	0.209622
SFB4-65	44.9786	4.17317	23.0193	4.71092	1.39186	24.197	12.955	6.20985	1.71306	0.856531	0.107066	14.2398	9.10064	0.856531	0.535332	0.107066	0	Impact of human activities and vegetation changes on the tetraether sources in Lake St Front (Massif Central, France) sources in Lake St Front (Massif Central, France)t of human activities and vegetation changes on the tetraether								29.1221	46.0385	24.8394	0.257353
SF16-2C-85	44.9815	4.17058	22.7519	4.55038	1.30011	25.3521	13.1094	5.85049	1.73348	0.758397	0.108342	13.7595	9.31744	0.866739	0.433369	0.108342	0	Impact of human activities and vegetation changes on the tetraether sources in Lake St Front (Massif Central, France) sources in Lake St Front (Massif Central, France)t of human activities and vegetation changes on the tetraether								28.6024	46.9122	24.4854	0.25
SFB4-75	44.9786	4.17317	24.0899	4.92505	1.49893	23.0193	13.0621	6.20985	1.92719	0.856531	0.107066	13.3833	9.52891	0.749465	0.428266	0.107066	0.107066	Impact of human activities and vegetation changes on the tetraether sources in Lake St Front (Massif Central, France) sources in Lake St Front (Massif Central, France)t of human activities and vegetation changes on the tetraether								30.5139	45.182	24.3041	0.259649
SF16-2C-95	44.9815	4.17058	22.1983	4.63362	1.40086	25.1078	12.3922	6.57328	1.8319	0.75431	0.107759	14.7629	8.83621	0.862069	0.431034	0.107759	0	Impact of human activities and vegetation changes on the tetraether sources in Lake St Front (Massif Central, France) sources in Lake St Front (Massif Central, France)t of human activities and vegetation changes on the tetraether								28.2328	46.7672	25	0.263359
SFB5-7	44.9786	4.17317	21.7438	4.84392	1.507	25.6189	11.6254	6.99677	2.2605	0.861141	0.215285	14.747	7.96555	0.861141	0.538213	0.107643	0.107643	Impact of human activities and vegetation changes on the tetraether sources in Lake St Front (Massif Central, France) sources in Lake St Front (Massif Central, France)t of human activities and vegetation changes on the tetraether								28.0947	47.578	24.3272	0.279693
SFB5-10	44.9786	4.17317	21.7716	4.80256	1.49413	25.4002	11.7396	7.15048	2.13447	0.960512	0.213447	15.048	7.79082	0.853789	0.426894	0.106724	0.106724	Impact of human activities and vegetation changes on the tetraether sources in Lake St Front (Massif Central, France) sources in Lake St Front (Massif Central, France)t of human activities and vegetation changes on the tetraether								28.0683	47.5987	24.333	0.277567
SFB5-20	44.9786	4.17317	23.0852	4.96224	1.51025	23.7325	12.945	6.79612	2.26537	0.862999	0.21575	13.4844	8.62999	0.755124	0.539374	0.107875	0.107875	Impact of human activities and vegetation changes on the tetraether sources in Lake St Front (Massif Central, France) sources in Lake St Front (Massif Central, France)t of human activities and vegetation changes on the tetraether								29.5577	46.8177	23.6246	0.270073
SFB5-30	44.9786	4.17317	22.6782	4.9676	1.61987	23.8661	12.419	7.12743	2.37581	0.863931	0.215983	14.2549	7.99136	0.863931	0.539957	0.107991	0.107991	Impact of human activities and vegetation changes on the tetraether sources in Lake St Front (Massif Central, France) sources in Lake St Front (Massif Central, France)t of human activities and vegetation changes on the tetraether								29.2657	46.8683	23.8661	0.280443
SFB5-60	44.9786	4.17317	22.8296	4.82315	1.28617	24.2229	12.6474	7.07395	1.82208	0.857449	0.107181	15.0054	7.82422	0.857449	0.428725	0.107181	0.107181	Impact of human activities and vegetation changes on the tetraether sources in Lake St Front (Massif Central, France) sources in Lake St Front (Massif Central, France)t of human activities and vegetation changes on the tetraether								28.9389	46.731	24.3301	0.255556
SFB5-70	44.9786	4.17317	21.7438	4.73628	1.18407	24.7578	13.0248	6.78149	2.04521	0.861141	0.107643	14.9623	8.18084	0.861141	0.538213	0.107643	0.107643	Impact of human activities and vegetation changes on the tetraether sources in Lake St Front (Massif Central, France) sources in Lake St Front (Massif Central, France)t of human activities and vegetation changes on the tetraether								27.6642	47.578	24.7578	0.256809
SFB5-80	44.9786	4.17317	22.8541	5.4721	1.50215	24.1416	12.6609	6.97425	2.03863	0.965665	0	14.2704	7.72532	0.751073	0.536481	0.107296	0	Impact of human activities and vegetation changes on the tetraether sources in Lake St Front (Massif Central, France) sources in Lake St Front (Massif Central, France)t of human activities and vegetation changes on the tetraether								29.8283	46.7811	23.3906	0.284173
SFB5-90	44.9786	4.17317	22.1744	5.0592	1.29171	24.0043	12.4865	7.3197	1.93757	0.968784	0.107643	15.2853	7.64263	0.968784	0.538213	0.107643	0.107643	Impact of human activities and vegetation changes on the tetraether sources in Lake St Front (Massif Central, France) sources in Lake St Front (Massif Central, France)t of human activities and vegetation changes on the tetraether								28.5253	46.8245	24.6502	0.267925
SFB5-97	44.9786	4.17317	23.1931	5.50162	1.2945	23.8403	12.4056	7.11974	2.04962	0.862999	0.107875	14.5631	7.44337	0.862999	0.539374	0.107875	0.107875	Impact of human activities and vegetation changes on the tetraether sources in Lake St Front (Massif Central, France) sources in Lake St Front (Massif Central, France)t of human activities and vegetation changes on the tetraether								29.9892	46.3862	23.6246	0.269784
SFB6-5	44.9786	4.17317	20.7931	4.93033	1.50054	23.2583	12.5402	7.3955	2.2508	1.17899	0.107181	16.0772	8.25295	0.857449	0.535906	0.214362	0.107181	Impact of human activities and vegetation changes on the tetraether sources in Lake St Front (Massif Central, France) sources in Lake St Front (Massif Central, France)t of human activities and vegetation changes on the tetraether								27.224	46.731	26.045	0.291339
SFB6-15	44.9786	4.17317	21.9721	4.39443	1.17899	20.9003	14.4695	6.43087	3.21543	0.857449	0.107181	16.0772	8.78885	0.857449	0.643087	0.107181	0	Impact of human activities and vegetation changes on the tetraether sources in Lake St Front (Massif Central, France) sources in Lake St Front (Massif Central, France)t of human activities and vegetation changes on the tetraether								27.5456	45.9807	26.4737	0.245136
SFB6-25	44.9786	4.17317	21.3904	4.91979	1.17647	22.3529	13.4759	6.31016	3.20856	0.855615	0.106952	15.615	8.98396	0.748663	0.641711	0.106952	0.106952	Impact of human activities and vegetation changes on the tetraether sources in Lake St Front (Massif Central, France) sources in Lake St Front (Massif Central, France)t of human activities and vegetation changes on the tetraether								27.4866	46.3102	26.2032	0.264591
SFB6-35	44.9786	4.17317	21.6331	5.19618	1.16649	22.2694	14.8462	5.40827	3.28738	0.742312	0.106045	14.9523	8.90774	0.636267	0.636267	0.106045	0.106045	Impact of human activities and vegetation changes on the tetraether sources in Lake St Front (Massif Central, France) sources in Lake St Front (Massif Central, France)t of human activities and vegetation changes on the tetraether								27.9958	46.6596	25.3446	0.268939
SFB6-45	44.9786	4.17317	20.9574	4.89362	1.06383	21.383	15.3191	5.42553	4.14894	0.638298	0.106383	14.2553	9.89362	0.744681	0.957447	0.106383	0.106383	Impact of human activities and vegetation changes on the tetraether sources in Lake St Front (Massif Central, France) sources in Lake St Front (Massif Central, France)t of human activities and vegetation changes on the tetraether								26.9149	47.0213	26.0638	0.26087
SFB6-55	44.9786	4.17317	18.9968	4.58911	0.960512	22.3052	13.4472	6.61686	3.20171	0.747065	0.106724	17.8228	9.39168	0.853789	0.747065	0.106724	0.106724	Impact of human activities and vegetation changes on the tetraether sources in Lake St Front (Massif Central, France) sources in Lake St Front (Massif Central, France)t of human activities and vegetation changes on the tetraether								24.5464	46.4248	29.0288	0.265217
SFB6-65	44.9786	4.17317	19.0832	4.79744	1.0661	21.6418	13.9659	6.71642	3.3049	0.852878	0.10661	17.0576	9.59488	0.852878	0.746269	0.10661	0.10661	Impact of human activities and vegetation changes on the tetraether sources in Lake St Front (Massif Central, France) sources in Lake St Front (Massif Central, France)t of human activities and vegetation changes on the tetraether								24.9467	46.5885	28.4648	0.277778
SFB6-85	44.9786	4.17317	20.4691	5.54371	1.17271	20.1493	15.8849	5.75693	4.69083	0.746269	0.10661	13.4328	10.1279	0.746269	0.959488	0.10661	0.10661	Impact of human activities and vegetation changes on the tetraether sources in Lake St Front (Massif Central, France) sources in Lake St Front (Massif Central, France)t of human activities and vegetation changes on the tetraether								27.1855	47.3348	25.4797	0.290196
SFB6-95	44.9786	4.17317	19.936	5.65032	1.27932	21.1087	15.1386	6.07676	3.94456	0.746269	0.10661	13.9659	10.1279	0.852878	0.852878	0.10661	0.10661	Impact of human activities and vegetation changes on the tetraether sources in Lake St Front (Massif Central, France) sources in Lake St Front (Massif Central, France)t of human activities and vegetation changes on the tetraether								26.8657	47.1215	26.0128	0.305556
SFB7-5	44.9786	4.17317	20.0214	5.03212	0.856531	21.7345	14.8822	6.31692	3.64026	0.749465	0.107066	14.9893	9.95717	0.749465	0.749465	0.107066	0.107066	Impact of human activities and vegetation changes on the tetraether sources in Lake St Front (Massif Central, France) sources in Lake St Front (Massif Central, France)t of human activities and vegetation changes on the tetraether								25.9101	47.4304	26.6595	0.260331
SFB7-15	44.9786	4.17317	20.8955	5.22388	0.959488	22.0682	15.6716	5.54371	3.94456	0.639659	0.10661	13.2196	10.0213	0.746269	0.746269	0.10661	0.10661	Impact of human activities and vegetation changes on the tetraether sources in Lake St Front (Massif Central, France) sources in Lake St Front (Massif Central, France)t of human activities and vegetation changes on the tetraether								27.0789	47.9744	24.9467	0.26378
SFB7-25	44.9786	4.17317	19.7466	4.85744	0.95037	20.8025	15.5227	5.49102	4.75185	0.63358	0.422386	14.4667	10.1373	0.739176	1.16156	0.105597	0.211193	Impact of human activities and vegetation changes on the tetraether sources in Lake St Front (Massif Central, France) sources in Lake St Front (Massif Central, France)t of human activities and vegetation changes on the tetraether								25.5544	47.6241	26.8215	0.264463
SFB7-35	44.9786	4.17317	20.5479	4.84721	0.948367	20.5479	16.8599	5.2687	4.74183	0.632244	0.105374	13.0664	10.6428	0.632244	0.948367	0.105374	0.105374	Impact of human activities and vegetation changes on the tetraether sources in Lake St Front (Massif Central, France) sources in Lake St Front (Massif Central, France)t of human activities and vegetation changes on the tetraether								26.3435	48.156	25.5005	0.256
SFB7-45	44.9786	4.17317	20.1058	5.07937	0.952381	21.4815	15.5556	5.92593	3.91534	0.634921	0.10582	14.4974	9.94709	0.740741	0.846561	0.10582	0.10582	Impact of human activities and vegetation changes on the tetraether sources in Lake St Front (Massif Central, France) sources in Lake St Front (Massif Central, France)t of human activities and vegetation changes on the tetraether								26.1376	47.619	26.2434	0.267206
SFB7-55	44.9786	4.17317	21.421	5.19618	0.954401	23.1177	14.8462	5.83245	3.07529	0.636267	0.106045	13.5737	9.54401	0.742312	0.742312	0.106045	0.106045	Impact of human activities and vegetation changes on the tetraether sources in Lake St Front (Massif Central, France) sources in Lake St Front (Massif Central, France)t of human activities and vegetation changes on the tetraether								27.5716	47.614	24.8144	0.257692
SFB7-65	44.9786	4.17317	21.9409	4.85232	0.949367	22.5738	15.6118	5.48523	3.27004	0.632911	0.105485	12.4473	10.443	0.632911	0.843882	0.105485	0.105485	Impact of human activities and vegetation changes on the tetraether sources in Lake St Front (Massif Central, France) sources in Lake St Front (Massif Central, France)t of human activities and vegetation changes on the tetraether								27.7426	47.6793	24.5781	0.243346
SFB7-85	44.9786	4.17317	20.5726	4.87805	0.954401	22.7996	14.6341	5.93849	3.49947	0.742312	0.106045	14.7402	9.43796	0.742312	0.742312	0.106045	0.106045	Impact of human activities and vegetation changes on the tetraether sources in Lake St Front (Massif Central, France) sources in Lake St Front (Massif Central, France)t of human activities and vegetation changes on the tetraether								26.4051	47.72	25.8749	0.257028
SFB7-95	44.9786	4.17317	22.3517	4.66102	1.05932	24.8941	14.6186	5.9322	2.54237	0.635593	0.105932	12.6059	9.00424	0.741525	0.635593	0.105932	0.105932	Impact of human activities and vegetation changes on the tetraether sources in Lake St Front (Massif Central, France) sources in Lake St Front (Massif Central, France)t of human activities and vegetation changes on the tetraether								28.072	48.7288	23.1992	0.241509
SFB8-1	44.9786	4.17317	27.521	3.46639	0.735294	21.4286	17.9622	3.78151	3.57143	0.52521	0.105042	10.7143	8.61345	0.420168	0.945378	0.105042	0.105042	Impact of human activities and vegetation changes on the tetraether sources in Lake St Front (Massif Central, France) sources in Lake St Front (Massif Central, France)t of human activities and vegetation changes on the tetraether								31.7227	47.3739	20.9034	0.155629
SFB8-10	44.9786	4.17317	23.1501	4.01691	0.951374	17.4419	18.8161	4.86258	3.38266	0.739958	0.105708	13.9535	10.7822	0.634249	0.951374	0.105708	0.105708	Impact of human activities and vegetation changes on the tetraether sources in Lake St Front (Massif Central, France) sources in Lake St Front (Massif Central, France)t of human activities and vegetation changes on the tetraether								28.1184	45.3488	26.5328	0.210526
SFB8-20	44.9786	4.17317	21.2025	5.37975	1.16034	19.3038	15.8228	5.6962	3.90295	1.05485	0.105485	14.135	10.5485	0.632911	0.843882	0.105485	0.105485	Impact of human activities and vegetation changes on the tetraether sources in Lake St Front (Massif Central, France) sources in Lake St Front (Massif Central, France)t of human activities and vegetation changes on the tetraether								27.7426	45.8861	26.3713	0.277567
SFB8-50	44.9786	4.17317	23.3684	5.36842	1.47368	22.4211	12.8421	5.47368	2.21053	0.947368	0.105263	16.2105	8.42105	0.526316	0.526316	0.105263	0	Impact of human activities and vegetation changes on the tetraether sources in Lake St Front (Massif Central, France) sources in Lake St Front (Massif Central, France)t of human activities and vegetation changes on the tetraether								30.2105	44	25.7895	0.275261
SFB8-60	44.9786	4.17317	23.6842	4.73684	1.26316	22.7368	12.5263	5.05263	2	0.842105	0.105263	17.5789	8.31579	0.526316	0.526316	0.105263	0	Impact of human activities and vegetation changes on the tetraether sources in Lake St Front (Massif Central, France) sources in Lake St Front (Massif Central, France)t of human activities and vegetation changes on the tetraether								29.6842	43.2632	27.0526	0.244681
SFB8-70	44.9786	4.17317	23.8648	4.54065	1.16156	23.2313	12.1436	4.96304	2.11193	0.739176	0.105597	17.6346	8.23654	0.527983	0.527983	0.105597	0.105597	Impact of human activities and vegetation changes on the tetraether sources in Lake St Front (Massif Central, France) sources in Lake St Front (Massif Central, France)t of human activities and vegetation changes on the tetraether								29.5671	43.2946	27.1383	0.232143
SFB8-80	44.9786	4.17317	24.0253	4.42571	1.15911	21.6017	14.2255	4.42571	2.95047	0.632244	0.105374	16.2276	8.9568	0.52687	0.632244	0.105374	0	Impact of human activities and vegetation changes on the tetraether sources in Lake St Front (Massif Central, France) sources in Lake St Front (Massif Central, France)t of human activities and vegetation changes on the tetraether								29.6101	43.941	26.4489	0.227758
SFB8-90	44.9786	4.17317	21.4963	3.79347	0.842993	19.0727	16.5437	4.63646	3.58272	0.632244	0.105374	16.8599	10.8535	0.632244	0.737619	0.105374	0.105374	Impact of human activities and vegetation changes on the tetraether sources in Lake St Front (Massif Central, France) sources in Lake St Front (Massif Central, France)t of human activities and vegetation changes on the tetraether								26.1328	44.5732	29.294	0.209677
SFB9-1	44.9786	4.17317	20.8686	4.02542	0.847458	20.9746	13.9831	5.82627	2.33051	0.847458	0.105932	18.5381	10.1695	0.741525	0.529661	0.105932	0.105932	Impact of human activities and vegetation changes on the tetraether sources in Lake St Front (Massif Central, France) sources in Lake St Front (Massif Central, France)t of human activities and vegetation changes on the tetraether								25.7415	44.0678	30.1907	0.222222
SFB9-10	44.9786	4.17317	20.8686	4.02542	0.95339	21.0805	13.4534	6.14407	2.01271	0.741525	0.105932	19.2797	9.85169	0.847458	0.529661	0.105932	0	Impact of human activities and vegetation changes on the tetraether sources in Lake St Front (Massif Central, France) sources in Lake St Front (Massif Central, France)t of human activities and vegetation changes on the tetraether								25.8475	43.5381	30.6144	0.229508
SFC1-5	44.9786	4.17317	20.8686	4.02542	0.95339	21.0805	13.4534	6.14407	2.01271	0.741525	0.105932	19.2797	9.85169	0.847458	0.529661	0.105932	0	Impact of human activities and vegetation changes on the tetraether sources in Lake St Front (Massif Central, France) sources in Lake St Front (Massif Central, France)t of human activities and vegetation changes on the tetraether								25.8475	43.5381	30.6144	0.229508
SFB9-20	44.9786	4.17317	20.4909	4.26894	1.06724	21.0245	13.4472	6.40342	2.45464	0.960512	0.106724	18.4632	9.81857	0.853789	0.533618	0.106724	0	Impact of human activities and vegetation changes on the tetraether sources in Lake St Front (Massif Central, France) sources in Lake St Front (Massif Central, France)t of human activities and vegetation changes on the tetraether								25.8271	44.397	29.7759	0.247934
SFC1-15	44.9786	4.17317	20.1493	4.15778	1.0661	21.322	13.2196	6.39659	2.34542	0.959488	0.10661	18.9765	9.70149	0.852878	0.533049	0.10661	0.10661	Impact of human activities and vegetation changes on the tetraether sources in Lake St Front (Massif Central, France) sources in Lake St Front (Massif Central, France)t of human activities and vegetation changes on the tetraether								25.3731	44.3497	30.2772	0.247899
SFB9-30	44.9786	4.17317	20.1933	4.29646	0.966702	20.8378	14.0709	5.90763	2.90011	0.859291	0.107411	18.1525	9.98926	0.859291	0.75188	0.107411	0	Impact of human activities and vegetation changes on the tetraether sources in Lake St Front (Massif Central, France) sources in Lake St Front (Massif Central, France)t of human activities and vegetation changes on the tetraether								25.4565	44.6831	29.8604	0.244726
SFB9-40	44.9786	4.17317	21.3362	4.20259	0.969828	17.1336	17.5647	5.06466	4.52586	0.862069	0.215517	15.3017	10.8836	0.646552	1.07759	0.107759	0.107759	Impact of human activities and vegetation changes on the tetraether sources in Lake St Front (Massif Central, France) sources in Lake St Front (Massif Central, France)t of human activities and vegetation changes on the tetraether								26.5086	45.3664	28.125	0.231707
SFC1-25	44.9786	4.17317	20.9677	4.4086	1.07527	20.5376	14.086	5.69892	3.22581	0.860215	0.107527	17.4194	9.78495	0.752688	0.860215	0.107527	0.107527	Impact of human activities and vegetation changes on the tetraether sources in Lake St Front (Massif Central, France) sources in Lake St Front (Massif Central, France)t of human activities and vegetation changes on the tetraether								26.4516	44.5161	29.0323	0.247967
SFB9-50	44.9786	4.17317	22.0213	4.46809	1.06383	15.7447	18.2979	5.10638	3.40426	1.06383	0.106383	15.5319	11.4894	0.638298	0.851064	0.106383	0.106383	Impact of human activities and vegetation changes on the tetraether sources in Lake St Front (Massif Central, France) sources in Lake St Front (Massif Central, France)t of human activities and vegetation changes on the tetraether								27.5532	43.7234	28.7234	0.239382
SFC1-35	44.9786	4.17317	20.2151	4.08602	0.967742	18.0645	16.6667	5.16129	3.54839	0.752688	0.107527	17.5269	11.1828	0.752688	0.860215	0.107527	0	Impact of human activities and vegetation changes on the tetraether sources in Lake St Front (Massif Central, France) sources in Lake St Front (Massif Central, France)t of human activities and vegetation changes on the tetraether								25.2688	44.3011	30.4301	0.238298
SFB9-60	44.9786	4.17317	19.1693	4.04686	0.85197	19.0628	14.9095	5.6443	2.9819	0.745474	0.106496	19.9148	10.9691	0.85197	0.638978	0.106496	0	Impact of human activities and vegetation changes on the tetraether sources in Lake St Front (Massif Central, France) sources in Lake St Front (Massif Central, France)t of human activities and vegetation changes on the tetraether								24.0682	43.4505	32.4814	0.238938
SFC1-45	44.9786	4.17317	21.0526	3.65199	0.859291	15.3598	19.334	4.40387	3.32975	0.75188	0.107411	17.0784	12.5671	0.644468	0.75188	0.107411	0	Impact of human activities and vegetation changes on the tetraether sources in Lake St Front (Massif Central, France) sources in Lake St Front (Massif Central, France)t of human activities and vegetation changes on the tetraether								25.5639	43.2868	31.1493	0.210084
SFB9-70	44.9786	4.17317	19.5304	5.12273	1.17396	17.5027	15.048	6.72359	3.52188	1.28068	0.106724	16.9691	11.0993	0.747065	0.853789	0.213447	0.106724	Impact of human activities and vegetation changes on the tetraether sources in Lake St Front (Massif Central, France) sources in Lake St Front (Massif Central, France)t of human activities and vegetation changes on the tetraether								25.8271	44.1836	29.9893	0.289256
SFC1-55	44.9786	4.17317	19.5122	3.92365	0.848356	19.7243	14.316	5.62036	2.65111	0.636267	0.106045	20.7847	10.3924	0.742312	0.636267	0.106045	0	Impact of human activities and vegetation changes on the tetraether sources in Lake St Front (Massif Central, France) sources in Lake St Front (Massif Central, France)t of human activities and vegetation changes on the tetraether								24.2842	43.0541	32.6617	0.231441
SFB9-80	44.9786	4.17317	20.4082	4.40387	0.966702	20.8378	14.1783	6.76692	2.36305	0.75188	0	18.1525	9.55961	0.859291	0.537057	0.107411	0.107411	Impact of human activities and vegetation changes on the tetraether sources in Lake St Front (Massif Central, France) sources in Lake St Front (Massif Central, France)t of human activities and vegetation changes on the tetraether								25.7787	44.898	29.3233	0.245833
SFC1-65	44.9786	4.17317	20.1708	4.37567	0.960512	17.7161	16.222	5.76307	3.84205	0.960512	0.213447	16.7556	11.206	0.747065	0.853789	0.106724	0.106724	Impact of human activities and vegetation changes on the tetraether sources in Lake St Front (Massif Central, France) sources in Lake St Front (Massif Central, France)t of human activities and vegetation changes on the tetraether								25.5069	44.7172	29.7759	0.246862
SFC1-75	44.9786	4.17317	19.5279	4.50644	0.965665	21.2446	14.2704	6.65236	2.46781	0.751073	0.107296	18.5622	9.44206	0.858369	0.536481	0.107296	0	Impact of human activities and vegetation changes on the tetraether sources in Lake St Front (Massif Central, France) sources in Lake St Front (Massif Central, France)t of human activities and vegetation changes on the tetraether								25	45.4936	29.5064	0.257511
SFC1-85	44.9786	4.17317	19.3376	4.48718	1.06838	20.0855	13.9957	6.73077	2.99145	0.961538	0.106838	18.6966	9.9359	0.854701	0.641026	0.106838	0	Impact of human activities and vegetation changes on the tetraether sources in Lake St Front (Massif Central, France) sources in Lake St Front (Massif Central, France)t of human activities and vegetation changes on the tetraether								24.8932	44.8718	30.235	0.266094
SFC1-95	44.9786	4.17317	19.8718	4.16667	0.854701	21.047	13.8889	6.62393	2.24359	0.747863	0	19.4444	9.72222	0.854701	0.42735	0.106838	0	Impact of human activities and vegetation changes on the tetraether sources in Lake St Front (Massif Central, France) sources in Lake St Front (Massif Central, France)t of human activities and vegetation changes on the tetraether								24.8932	44.5513	30.5556	0.236052
SFC2-1	44.9786	4.17317	19.0021	3.92781	0.849257	20.1699	13.8004	6.6879	2.33546	0.849257	0	20.4883	10.4034	0.849257	0.530786	0.106157	0	Impact of human activities and vegetation changes on the tetraether sources in Lake St Front (Massif Central, France) sources in Lake St Front (Massif Central, France)t of human activities and vegetation changes on the tetraether								23.7792	43.8429	32.3779	0.236607
SFC2-10	44.9786	4.17317	19.1489	4.04255	0.851064	20.2128	14.4681	6.2766	2.97872	0.744681	0.106383	18.617	10.7447	0.851064	0.744681	0.106383	0.106383	Impact of human activities and vegetation changes on the tetraether sources in Lake St Front (Massif Central, France) sources in Lake St Front (Massif Central, France)t of human activities and vegetation changes on the tetraether								24.0426	44.7872	31.1702	0.238938
SFC2-20	44.9786	4.17317	18.6837	3.92781	0.849257	21.3376	13.6943	6.47558	2.76008	0.7431	0	19.2144	10.7219	0.7431	0.7431	0.106157	0	Impact of human activities and vegetation changes on the tetraether sources in Lake St Front (Massif Central, France) sources in Lake St Front (Massif Central, France)t of human activities and vegetation changes on the tetraether								23.4607	45.0106	31.5287	0.239819
SFC2-30	44.9786	4.17317	17.0213	3.7234	0.851064	17.8723	14.7872	6.91489	4.14894	0.851064	0	18.7234	12.5532	1.38298	1.06383	0.106383	0	Impact of human activities and vegetation changes on the tetraether sources in Lake St Front (Massif Central, France) sources in Lake St Front (Massif Central, France)t of human activities and vegetation changes on the tetraether								21.5957	44.5745	33.8298	0.251232
SFC2-40	44.9786	4.17317	17.766	3.82979	0.851064	20.2128	13.2979	7.12766	2.02128	0.957447	0	21.2766	11.2766	0.851064	0.425532	0.106383	0	Impact of human activities and vegetation changes on the tetraether sources in Lake St Front (Massif Central, France) sources in Lake St Front (Massif Central, France)t of human activities and vegetation changes on the tetraether								22.4468	43.617	33.9362	0.246445
SFC2-50	44.9786	4.17317	17.8533	3.82572	0.956429	20.8289	12.8587	7.33262	2.01913	0.956429	0.10627	20.9352	10.8395	0.956429	0.42508	0.10627	0	Impact of human activities and vegetation changes on the tetraether sources in Lake St Front (Massif Central, France) sources in Lake St Front (Massif Central, France)t of human activities and vegetation changes on the tetraether								22.6355	44.102	33.2625	0.253521
SFC2-60	44.9786	4.17317	17.5345	3.71945	0.850159	20.7226	12.6461	7.54516	1.91286	0.956429	0	21.7853	10.9458	0.850159	0.42508	0.10627	0	Impact of human activities and vegetation changes on the tetraether sources in Lake St Front (Massif Central, France) sources in Lake St Front (Massif Central, France)t of human activities and vegetation changes on the tetraether								22.1041	43.7832	34.1126	0.245192
SFC2-70	44.9786	4.17317	17.0032	3.40064	0.850159	19.9787	13.39	7.22635	1.91286	0.956429	0	21.6791	12.0085	0.956429	0.53135	0.10627	0	Impact of human activities and vegetation changes on the tetraether sources in Lake St Front (Massif Central, France) sources in Lake St Front (Massif Central, France)t of human activities and vegetation changes on the tetraether								21.254	43.4644	35.2816	0.24
SF16-3E-1-13	44.9815	4.17058	14.6838	3.00107	0.643087	20.1501	12.9689	7.18114	1.82208	0.750268	0.107181	23.687	13.3976	0.96463	0.535906	0.107181	0	Impact of human activities and vegetation changes on the tetraether sources in Lake St Front (Massif Central, France) sources in Lake St Front (Massif Central, France)t of human activities and vegetation changes on the tetraether								18.328	42.9796	38.6924	0.233918
SFC2-80	44.9786	4.17317	17.1642	3.73134	0.852878	19.936	13.3262	7.24947	2.02559	0.959488	0	21.322	11.8337	0.959488	0.533049	0.10661	0	Impact of human activities and vegetation changes on the tetraether sources in Lake St Front (Massif Central, France) sources in Lake St Front (Massif Central, France)t of human activities and vegetation changes on the tetraether								21.7484	43.4968	34.7548	0.25
SF16-3E-1-25	44.9815	4.17058	15.9529	3.21199	0.749465	20.1285	13.2762	7.17345	2.03426	0.856531	0.107066	22.2698	12.6338	0.963597	0.535332	0.107066	0	Impact of human activities and vegetation changes on the tetraether sources in Lake St Front (Massif Central, France) sources in Lake St Front (Massif Central, France)t of human activities and vegetation changes on the tetraether								19.9143	43.576	36.5096	0.236559
SFC2-88	44.9786	4.17317	15.9529	3.21199	0.749465	20.1285	13.2762	7.17345	2.03426	0.856531	0.107066	22.2698	12.6338	0.963597	0.535332	0.107066	0	Impact of human activities and vegetation changes on the tetraether sources in Lake St Front (Massif Central, France) sources in Lake St Front (Massif Central, France)t of human activities and vegetation changes on the tetraether								19.9143	43.576	36.5096	0.236559
SF16-3E-1-40	44.9815	4.17058	15.9744	3.30138	0.745474	20.3408	13.738	6.81576	2.02343	0.745474	0	21.7252	12.886	1.06496	0.532481	0.106496	0	Impact of human activities and vegetation changes on the tetraether sources in Lake St Front (Massif Central, France) sources in Lake St Front (Massif Central, France)t of human activities and vegetation changes on the tetraether								20.0213	43.6635	36.3152	0.239362
SFC3-5	44.9786	4.17317	16.5429	3.07529	0.742312	20.3606	13.6797	6.15058	1.9088	0.742312	0	23.1177	12.3012	0.848356	0.424178	0.106045	0	Impact of human activities and vegetation changes on the tetraether sources in Lake St Front (Massif Central, France) sources in Lake St Front (Massif Central, France)t of human activities and vegetation changes on the tetraether								20.3606	42.842	36.7975	0.223958
SFC3-15	44.9786	4.17317	15.7279	3.08183	0.743889	19.9787	13.6026	6.48247	1.80659	0.743889	0	24.2295	12.221	0.850159	0.42508	0.10627	0	Impact of human activities and vegetation changes on the tetraether sources in Lake St Front (Massif Central, France) sources in Lake St Front (Massif Central, France)t of human activities and vegetation changes on the tetraether								19.5537	42.6142	37.8321	0.233696
SF16-3E-1-55	44.9815	4.17058	14.5435	3.07856	0.7431	19.0021	14.3312	5.9448	2.44161	0.636943	0.106157	23.8854	13.5881	1.06157	0.530786	0.106157	0	Impact of human activities and vegetation changes on the tetraether sources in Lake St Front (Massif Central, France) sources in Lake St Front (Massif Central, France)t of human activities and vegetation changes on the tetraether								18.3652	42.4628	39.172	0.248555
SFC3-25	44.9786	4.17317	15.8342	3.1881	0.743889	19.5537	14.0276	6.58874	1.91286	0.743889	0	22.7418	13.0712	0.956429	0.53135	0.10627	0	Impact of human activities and vegetation changes on the tetraether sources in Lake St Front (Massif Central, France) sources in Lake St Front (Massif Central, France)t of human activities and vegetation changes on the tetraether								19.7662	42.8268	37.407	0.236559
[truncated: 514 more rows]
